# Supplementary material for: NHPI-catalyzed electrochemical C–H alkylation of indoles with alcohols to access di(indolyl)methanes via radical coupling
Source: Royal Society of Chemistry journal article supplement (doi:10.1039/d2qo01498j), 2022-01-01

## NHPI-catalyzed electrochemical C–H alkylation of indoles with alcohols to access di(indolyl)methanes via radical coupling

Bingwen Li,<sup>a,†</sup> Hongyun Qin,<sup>b,†</sup> Kelu Yan,<sup>b</sup> Jing Ma,<sup>b</sup> Jianjing Yang,<sup>\* b</sup> and Jiangwei Wen<sup>\* b</sup>

<sup>[a]</sup> Shandong Key Laboratory of Biophysics, Institute of Biophysics, Dezhou University, Dezhou 253023, China.

<sup>[b]</sup> Key Laboratory of Green Natural Products and Pharmaceutical Intermediates in Colleges and Universities of Shandong Province, School of Chemistry and Chemical Engineering, Qufu Normal University, China.

<sup>†</sup> These authors contributed equally to this work.

Email: [wenjy@qfnu.edu.cn](mailto:wenjy@qfnu.edu.cn), [jjyang@whu.edu.cn](mailto:jjyang@whu.edu.cn)

### Contents

|                                                      |     |
|------------------------------------------------------|-----|
| 1. General information                               | S2  |
| 2. Large-scale experiments                           | S2  |
| 3. Preliminary mechanistic studies                   | S2  |
| (1) Radical trapping experiments                     | S2  |
| (2) KIE experiments                                  | S3  |
| 4. Cartesian Coordinates of DFT Optimized Structures | S6  |
| 5. References                                        | S53 |
| 6. Detail descriptions for products                  | S54 |
| 7. Copies of product NMR spectra                     | S67 |

## 1. General information

All glassware was oven dried at 100 °C for hours and cooled down under vacuum. Indoles was prepared according to reported procedures.<sup>1</sup> Unless otherwise noted, materials were obtained from commercial suppliers and used without further purification. The instrument for electrolysis is dual display potentiostat (DJS-292B) (made in China), the carbon rods ( $\phi = 6$  mm), Ni plates (1.0 x 1.0 cm<sup>2</sup>), and Pt plates (1.0 x 1.0 cm<sup>2</sup>) was purchased from Xuzhou Xinke Instrument and Meter Co. LTD. The thin layer chromatography (TLC) employed glass 0.25 mm silica gel plates. Flash chromatography columns were packed with 200-300 mesh silica gel in petroleum (b. p. 60-90 °C). <sup>1</sup>H, <sup>13</sup>C NMR, and <sup>19</sup>F NMR data were recorded with Bruker Advance III (500 MHz) spectrometers with tetramethylsilane as an internal standard. All chemical shifts ( $\delta$ ) are reported in ppm and coupling constants ( $J$ ) in Hz. All chemical shifts are reported relative to tetramethylsilane and *d*-solvent peaks (77.00 ppm, chloroform; 40.00 ppm, DMSO-*d*<sub>6</sub>), respectively.

## 2. Large-scale synthesis of 11c.

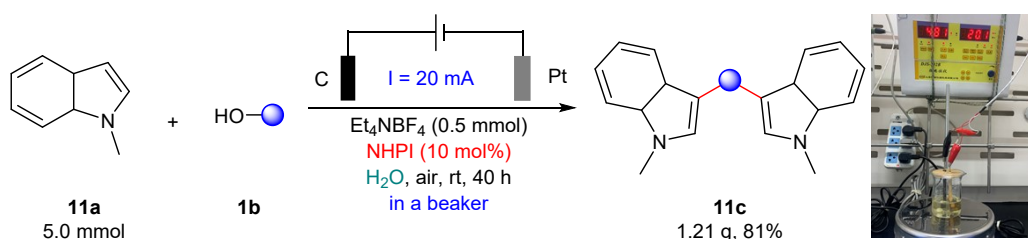

In an oven-dried beaker (100 mL) equipped with a stir bar, **11a** (5.0 mmol, 0.665 g), **1b** (50.0 mmol, 1.6 g), and Et<sub>4</sub>NBF<sub>4</sub> (5.0 mmol, 1.085 g) were combined. The beaker was equipped with a carbon rods ( $\phi = 6.0$  mm) as the anode and Pt plates (1.0 × 1.0 cm<sup>2</sup>) as the cathode. Under the air, H<sub>2</sub>O (30.0 mL) was slowly injected into the reaction system. The reaction mixture was stirred and electrolyzed at a constant current of 20 mA under room temperature for 40 h. When the reaction was finished, the reaction mixture was concentrated, and then extracted with CH<sub>2</sub>Cl<sub>2</sub> (10 mL × 3). The organic layers were combined, dried over Na<sub>2</sub>SO<sub>4</sub>, and concentrated again. The pure product **11c** was obtained in a yield of 81% by flash column chromatography on silica gel (EtOAc/petroleum ether = 1/100).

## 3. Preliminary mechanistic studies

### (1) Radical trapping experiments

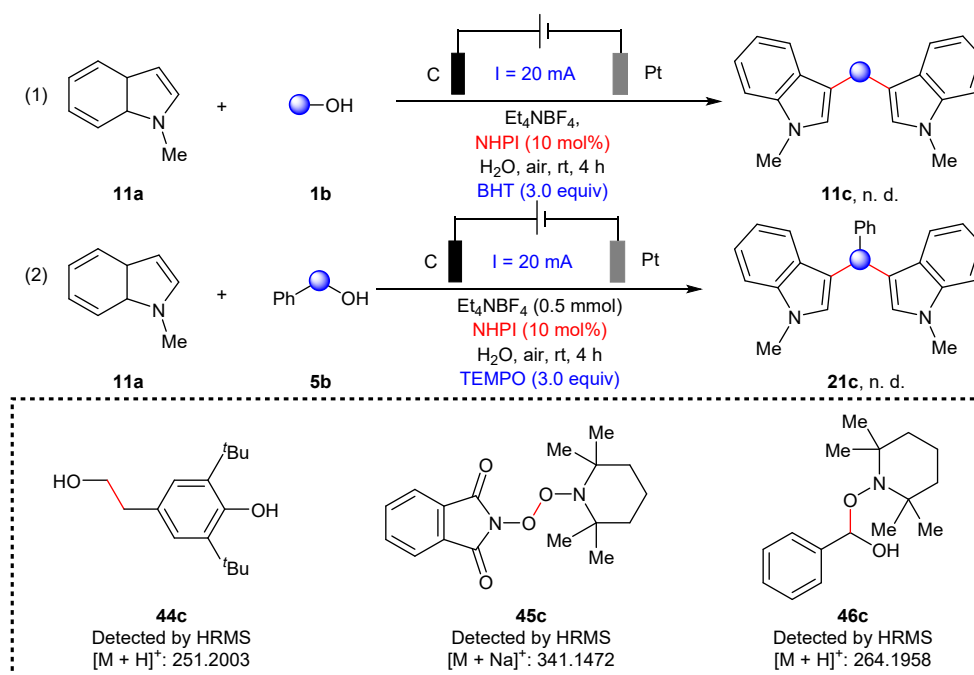

In an oven-dried beaker (25 mL) equipped with a stir bar, **11a** (0.5 mmol, 66.5 mg), **1b** (5.0 mmol, 160.0 mg) or **5b** (5.0 mmol, 540.0 mg), NHPI (10.0 mol%, 4.1 mg), TEMPO or BHT (3.0 equiv), and Et<sub>4</sub>NBF<sub>4</sub> (0.5 mmol, 108.5 mg) were combined. The beaker was equipped with a carbon rods ( $\phi = 6$  mm) as the anode and Pt plates (1.0 × 1.0 cm<sup>2</sup>) as the cathode. Under the air, H<sub>2</sub>O (8.0 mL) was slowly injected into the reaction system. The reaction mixture was stirred and electrolyzed at a constant current of 20 mA under room temperature for 4 h. When the reaction was finished, the reaction mixture was washed with water and extracted with CH<sub>2</sub>Cl<sub>2</sub> (10 mL × 3). The organic layers were combined and concentrated in vacuum and not detected the desired product **11c** or **21c**. The compounds **44c-46c** can be detected by HRMS.

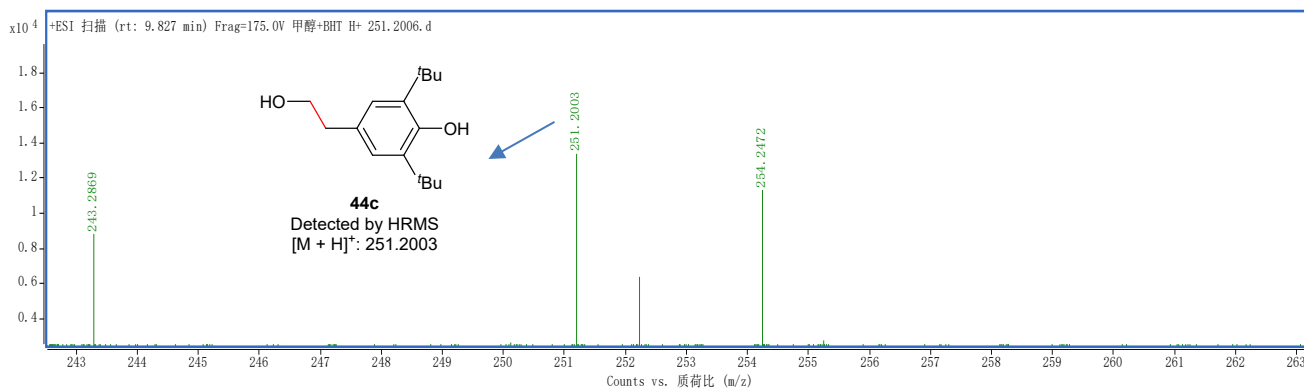

Fig. S1. The HRMS results of **44c**.

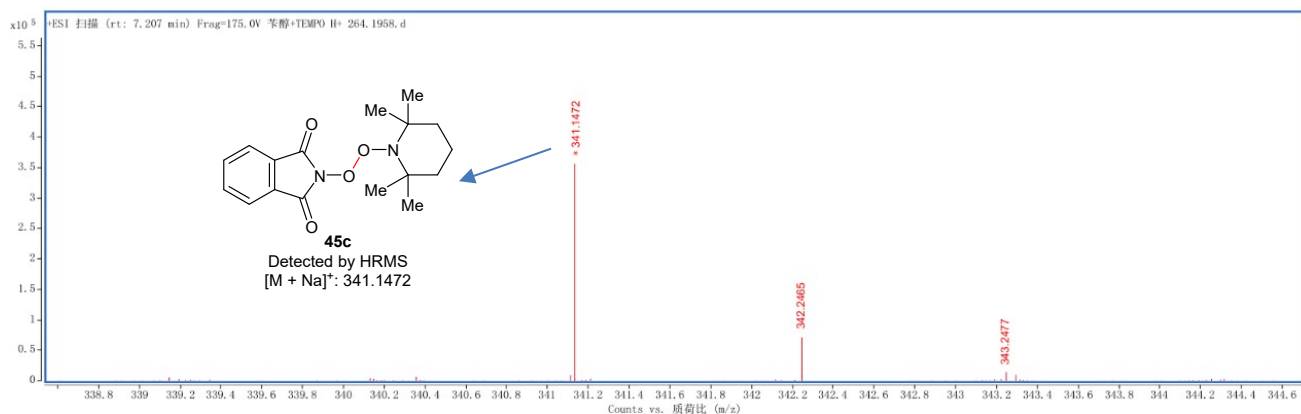

Fig. S2. The HRMS results of **45c**.

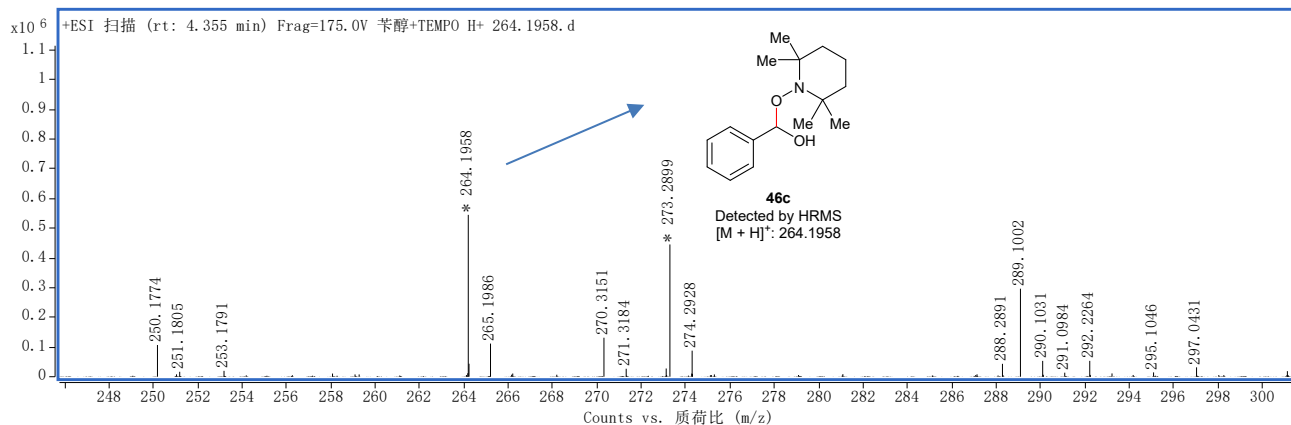

Fig. S3. The HRMS results of **46c**.

## (2) Intermolecular competitive kinetics experiments

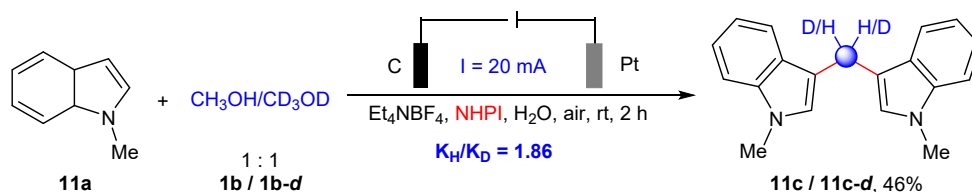

In an oven-dried beaker (25 mL) equipped with a stir bar, **11a** (0.5 mmol, 66.5 mg), **CH<sub>3</sub>OH** (2.5 mmol), **CD<sub>3</sub>OD** (2.5 mmol), NHPI (10.0 mol%, 4.1 mg), and Et<sub>4</sub>NBF<sub>4</sub> (0.5 mmol, 108.5 mg) were combined. The beaker was equipped with a carbon rods ( $\phi = 6$  mm) as the anode and Pt plates ( $1.0 \times 1.0$  cm<sup>2</sup>) as the cathode. Under the air, H<sub>2</sub>O (8.0 mL) was slowly injected into the reaction system. The reaction mixture was stirred and electrolyzed at a constant current of 20 mA under room temperature for 2 h. The pure product **11c** was obtained in a yield of 46% by flash column chromatography on silica gel (EtOAc/petroleum ether = 1/100), A KIE value of 1.86 was determined by <sup>1</sup>H NMR.

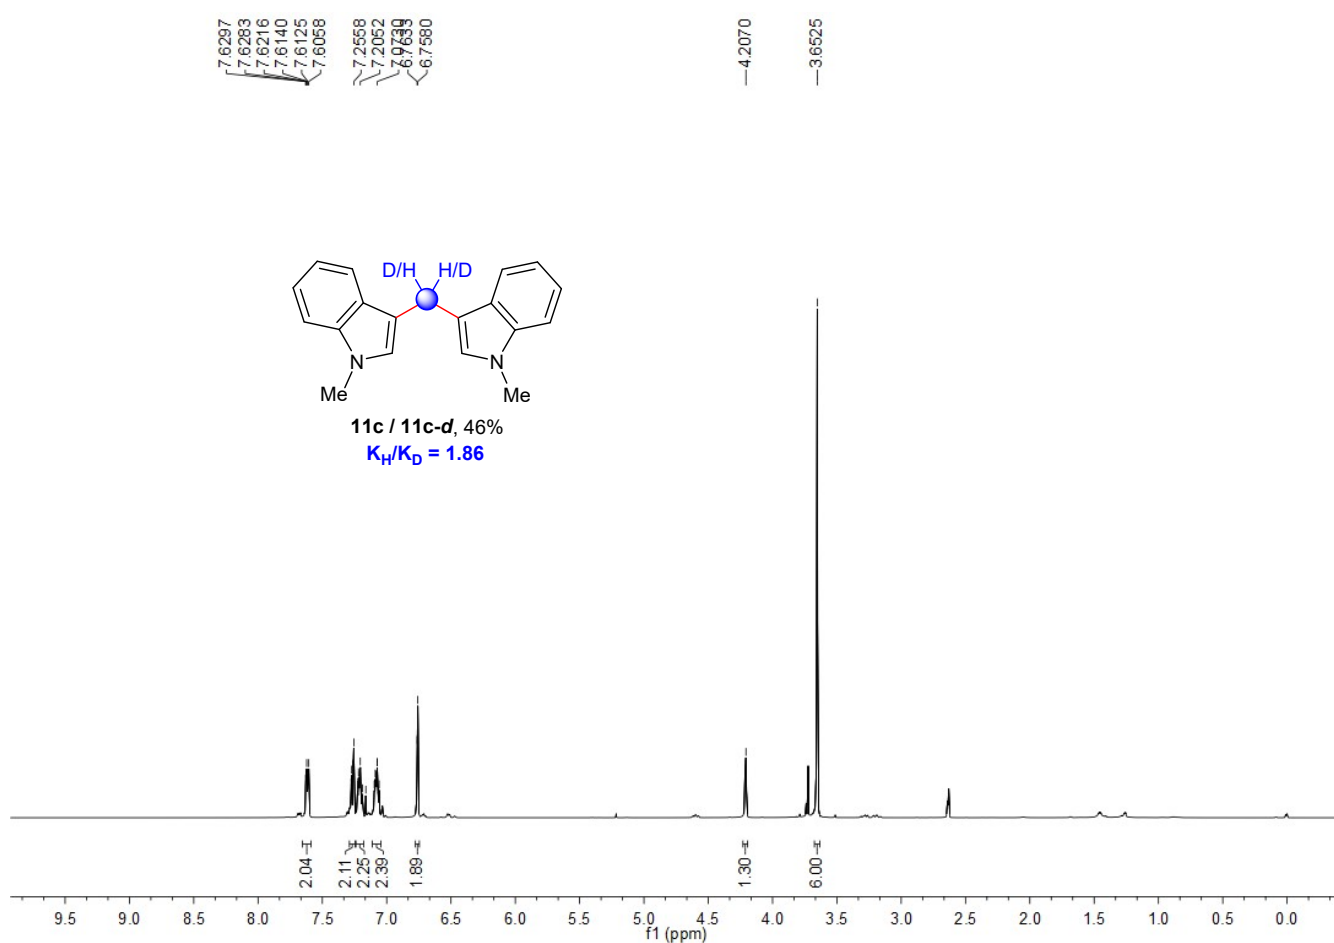

**Fig. S4.** <sup>1</sup>H NMR results of **11c / 11c-d**.

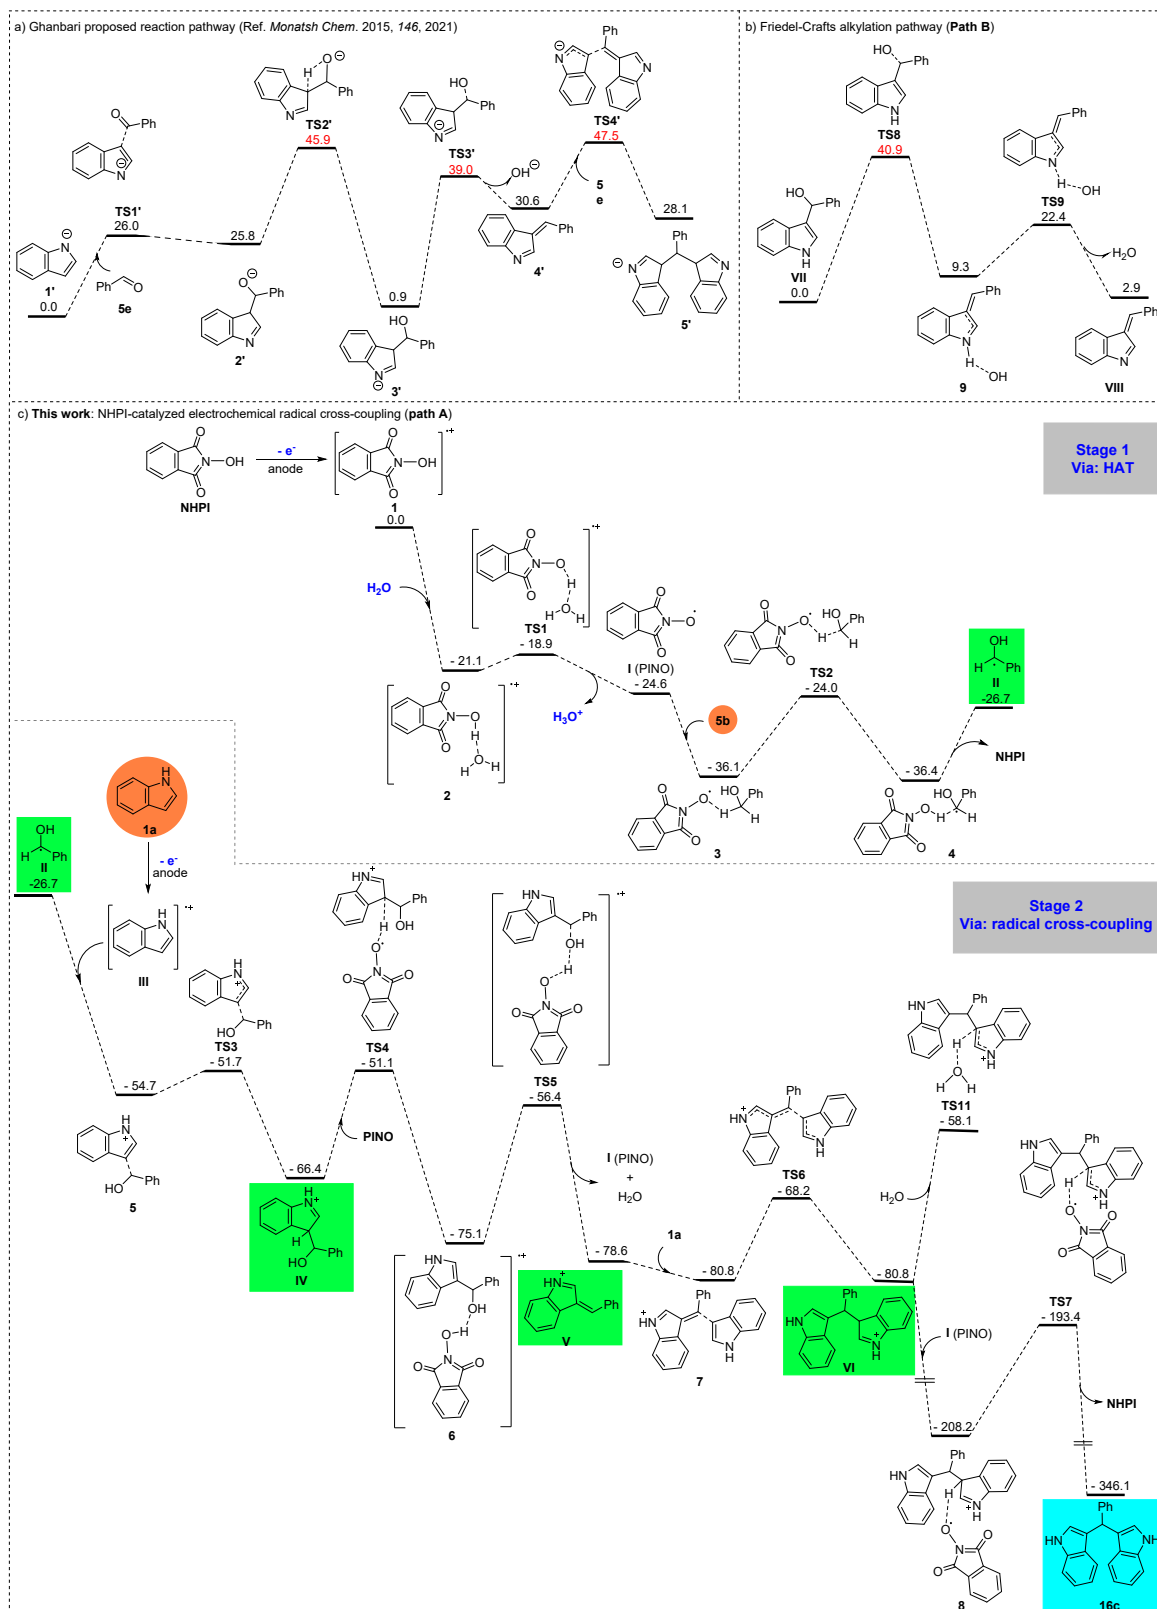

**Fig. S5.** Summary of DFT calculation results, the relative free energies are given in kcal/mol. [a] For Ghanbari proposed reaction pathway (Ref. *Monatsh Chem.* 2015, 146, 2021). [b] For Friedel-Crafts alkylation pathway. [c] Path A is the proposed reaction pathway based on experimental and DFT data (this work).

---

#### 4 Cartesian Coordinates of DFT Optimized Structures

Structure: NHPI

Charge = 0 Multiplicity = 1

Number of imaginary frequencies: 0

SCF Energy: -588.057577187 hartree

SCF Energy + ZPVE: -587.936943187 hartree

Free Energy: -587.971446 hartree

|   |              |              |              |
|---|--------------|--------------|--------------|
| C | -2.473978811 | 0.402395901  | -0.114242136 |
| C | -3.760110355 | 0.588730183  | 0.397770762  |
| C | -4.208729883 | 1.832636320  | 0.801885934  |
| C | -3.314078966 | 2.903540871  | 0.676620838  |
| C | -2.028587330 | 2.717776163  | 0.162284612  |
| C | -1.584762055 | 1.452970462  | -0.245959733 |
| C | -2.304385587 | -1.038630206 | -0.443345510 |
| H | -5.207814294 | 1.971584961  | 1.201849426  |
| H | -3.624148485 | 3.896129563  | 0.986311724  |
| H | -1.360509230 | 3.568889633  | 0.080355389  |
| H | -0.587388039 | 1.303298819  | -0.646393445 |
| N | -3.554187992 | -1.609446585 | -0.191121635 |
| O | -3.728077453 | -2.958588026 | -0.135589806 |
| H | -4.122615428 | -3.227775237 | -0.983336396 |
| O | -1.335443797 | -1.646922908 | -0.843973795 |
| O | -5.551564797 | -1.036242203 | 0.823618343  |
| C | -4.455072968 | -0.726615092 | 0.409914298  |

Structure: **1**

Charge = 1 Multiplicity = 2

Number of imaginary frequencies: 0

SCF Energy: -587.785529270 hartree

SCF Energy + ZPVE: -587.667580270 hartree

---

Free Energy: -587.703816 hartree

|   |              |              |              |
|---|--------------|--------------|--------------|
| C | -2.438583291 | 0.392284953  | -0.124152760 |
| C | -3.753290860 | 0.595333884  | 0.404848575  |
| C | -4.230579114 | 1.844342748  | 0.816126748  |
| C | -3.356338266 | 2.899347443  | 0.685497168  |
| C | -2.032102138 | 2.702335046  | 0.153357804  |
| C | -1.561291166 | 1.418900170  | -0.262049752 |
| C | -2.287001210 | -1.058354017 | -0.436722819 |
| H | -5.232468155 | 1.959872229  | 1.213620007  |
| H | -3.643734149 | 3.902309402  | 0.980616793  |
| H | -1.374459496 | 3.561177138  | 0.071651263  |
| H | -0.560240443 | 1.291298703  | -0.658273056 |
| N | -3.533079141 | -1.611760910 | -0.115437825 |
| O | -3.751966499 | -2.944365547 | -0.139082915 |
| H | -4.080071250 | -3.170515994 | -1.030361084 |
| O | -1.343545542 | -1.666757799 | -0.870030779 |
| O | -5.565538252 | -0.995137270 | 0.817578321  |
| C | -4.457166498 | -0.726577558 | 0.429463183  |

Structure: H<sub>2</sub>O

Charge = 0 Multiplicity = 1

Number of imaginary frequencies: 0

SCF Energy: -76.409061753 hartree

SCF Energy + ZPVE: -76.387722753 hartree

Free Energy: -76.406031 hartree

|   |              |              |              |
|---|--------------|--------------|--------------|
| O | -4.799433343 | -3.327955102 | -2.286346416 |
| H | -4.411956569 | -4.066800872 | -2.772170154 |
| H | -5.577351378 | -3.076248855 | -2.800139911 |

---

Structure: **2**

Charge = 1 Multiplicity = 2

Number of imaginary frequencies: 0

SCF Energy: -664.250722045 hartree

SCF Energy + ZPVE: -664.105104045 hartree

Free Energy: -664.143548 hartree

|   |              |              |              |
|---|--------------|--------------|--------------|
| C | -2.994165471 | 0.458465646  | -0.166320823 |
| C | -4.098041918 | 1.016183038  | 0.496947264  |
| C | -4.013469913 | 2.239482349  | 1.141786068  |
| C | -2.779882954 | 2.895662308  | 1.104022699  |
| C | -1.678810262 | 2.339197918  | 0.442133454  |
| C | -1.769150172 | 1.104944780  | -0.207023345 |
| C | -3.370618206 | -0.832511385 | -0.759992725 |
| H | -4.870552072 | 2.665530052  | 1.651945636  |
| H | -2.672131894 | 3.855818309  | 1.597045311  |
| H | -0.737682282 | 2.878273119  | 0.433347415  |
| H | -0.920737049 | 0.667746451  | -0.722189738 |
| N | -4.763475924 | -1.003261228 | -0.401259223 |
| O | -5.471058888 | -1.995680301 | -0.715962184 |
| H | -4.789302630 | -3.133298499 | -1.551709162 |
| O | -2.768602706 | -1.647222465 | -1.408365003 |
| O | -6.389709198 | 0.178423528  | 0.771902899  |
| C | -5.258508032 | 0.119008165  | 0.375463890  |
| O | -4.368645774 | -3.858570355 | -2.132272721 |
| H | -3.409935477 | -3.672906892 | -2.186629825 |
| H | -4.497685977 | -4.736260208 | -1.724580407 |

Structure: **TS1**

Charge = 1 Multiplicity = 2

Number of imaginary frequencies: 1



---

SCF Energy: -664.245666072 hartree

SCF Energy + ZPVE: -664.101660072 hartree

Free Energy: -664.139895 hartree

|   |              |              |              |
|---|--------------|--------------|--------------|
| C | -2.847862437 | 0.481073390  | -0.291919823 |
| C | -3.974315550 | 0.853366520  | 0.458439365  |
| C | -4.013717625 | 2.043243369  | 1.166894235  |
| C | -2.880647681 | 2.858900032  | 1.104682363  |
| C | -1.756238839 | 2.487214345  | 0.357888728  |
| C | -1.722380100 | 1.287022819  | -0.357317701 |
| C | -3.078627994 | -0.829133119 | -0.919458135 |
| H | -4.887378064 | 2.323238561  | 1.745622769  |
| H | -2.869302098 | 3.797120481  | 1.649031250  |
| H | -0.893006955 | 3.143798203  | 0.336885758  |
| H | -0.853300085 | 0.992303226  | -0.935613396 |
| N | -4.410936212 | -1.204315874 | -0.485766223 |
| O | -4.994422506 | -2.275598659 | -0.795788017 |
| H | -4.257369267 | -3.280581141 | -1.639917699 |
| O | -2.418568004 | -1.533043164 | -1.635051821 |
| O | -6.107230921 | -0.305126270 | 0.828994411  |
| C | -5.005984352 | -0.191404687 | 0.365534171  |
| O | -3.848929932 | -4.029764952 | -2.206376464 |
| H | -4.297964890 | -4.880728706 | -2.320108365 |
| H | -2.997395418 | -3.906196154 | -2.651999277 |

Structure: H<sub>3</sub>O<sup>+</sup>

Charge = 1 Multiplicity = 1

Number of imaginary frequencies: 0

SCF Energy: -76.824015049 hartree

SCF Energy + ZPVE: -76.788822049 hartree

Free Energy: -76.807950 hartree

---

|   |              |              |              |
|---|--------------|--------------|--------------|
| H | -3.965850055 | -3.520034539 | -1.157743076 |
| O | -4.246428843 | -3.394623107 | -2.087123661 |
| H | -4.189903997 | -4.251811063 | -2.556509899 |
| H | -5.174037225 | -3.082712351 | -2.098470283 |

Structure: **I** (PINO)

Charge = 0 Multiplicity = 2

Number of imaginary frequencies: 0

SCF Energy: -587.414877411 hartree

SCF Energy + ZPVE: -587.306355411 hartree

Free Energy: -587.341065 hartree

|   |              |              |              |
|---|--------------|--------------|--------------|
| C | -2.465275362 | 0.391921935  | -0.109193617 |
| C | -3.757524314 | 0.575109169  | 0.401615583  |
| C | -4.209561136 | 1.822637832  | 0.800179229  |
| C | -3.321172494 | 2.893984617  | 0.671202324  |
| C | -2.030533411 | 2.711105805  | 0.161260803  |
| C | -1.580214045 | 1.449806456  | -0.239188639 |
| C | -2.264974600 | -1.029412034 | -0.444635616 |
| H | -5.210441251 | 1.957809056  | 1.196199394  |
| H | -3.636121282 | 3.887277583  | 0.973127264  |
| H | -1.366970393 | 3.565411217  | 0.077800870  |
| H | -0.581318075 | 1.300867118  | -0.635379741 |
| N | -3.513088397 | -1.668582431 | -0.097160118 |
| O | -3.744100062 | -2.895438401 | -0.240730428 |
| O | -1.330453857 | -1.631918263 | -0.904187309 |
| O | -5.571341008 | -1.032382861 | 0.781056627  |
| C | -4.464725983 | -0.717902190 | 0.428782744  |

Structure: **5b**

Charge = 0 Multiplicity = 1

---

Number of imaginary frequencies: 0

SCF Energy: -346.648858859 hartree

SCF Energy + ZPVE: -346.514329859 hartree

Free Energy: -346.545857 hartree

|   |              |              |              |
|---|--------------|--------------|--------------|
| C | -6.234703006 | -3.599367418 | -5.649889147 |
| C | -5.574175084 | -3.170311434 | -4.497563109 |
| C | -5.872563938 | -3.739240072 | -3.257183235 |
| C | -6.841527001 | -4.745856231 | -3.182962467 |
| C | -7.501009216 | -5.179093533 | -4.331940750 |
| C | -7.198168153 | -4.604600020 | -5.568424345 |
| H | -5.998660838 | -3.148211709 | -6.609049932 |
| H | -4.822317125 | -2.387280963 | -4.559878326 |
| H | -7.078010754 | -5.187972508 | -2.217751475 |
| H | -8.253453858 | -5.959046343 | -4.263007276 |
| H | -7.714424541 | -4.937063029 | -6.464048828 |
| C | -5.134031650 | -3.313458777 | -2.017427626 |
| H | -4.680992482 | -2.327357464 | -2.168461116 |
| O | -4.115350915 | -4.284567868 | -1.749335507 |
| H | -3.669980796 | -4.032966529 | -0.928703244 |
| H | -5.822338853 | -3.257379431 | -1.166257136 |

Structure: **3**

Charge = 0 Multiplicity = 2

Number of imaginary frequencies: 0

SCF Energy: -934.081881295 hartree

SCF Energy + ZPVE: -933.837965295 hartree

Free Energy: -933.885151 hartree

|   |              |             |             |
|---|--------------|-------------|-------------|
| C | -5.985914341 | 2.650551463 | 0.628911087 |
| C | -6.417888220 | 2.260010653 | 1.902977199 |
| C | -5.517826959 | 1.934934354 | 2.906247431 |

---

|   |               |              |              |
|---|---------------|--------------|--------------|
| C | -4.158676005  | 2.014332543  | 2.593032300  |
| C | -3.727398746  | 2.406126235  | 1.319094499  |
| C | -4.639291850  | 2.731905966  | 0.311819994  |
| C | -7.155062927  | 2.881480424  | -0.238876729 |
| H | -5.859570576  | 1.622494564  | 3.887420510  |
| H | -3.421610372  | 1.764053103  | 3.348546260  |
| H | -2.663758751  | 2.452202547  | 1.110425728  |
| H | -4.312736007  | 3.025301589  | -0.680310812 |
| N | -8.297112706  | 2.634799913  | 0.611470781  |
| O | -9.491277928  | 2.661425865  | 0.221107414  |
| O | -7.260461041  | 3.198329533  | -1.394763034 |
| O | -8.681335170  | 1.910855912  | 2.786474747  |
| C | -7.889357569  | 2.217843427  | 1.930762367  |
| C | -6.234668903  | -0.328969628 | -0.820572548 |
| C | -7.625257191  | -0.221730776 | -0.796756795 |
| C | -8.348922185  | -0.583471108 | 0.345682610  |
| C | -7.656270768  | -1.038298652 | 1.471691648  |
| C | -6.263709093  | -1.139348864 | 1.451339834  |
| C | -5.549023595  | -0.788888298 | 0.305616472  |
| H | -5.685922695  | -0.034623225 | -1.710822572 |
| H | -8.156994342  | 0.156176257  | -1.667902130 |
| H | -8.207065138  | -1.304763796 | 2.369338054  |
| H | -5.736715898  | -1.484649732 | 2.336190365  |
| H | -4.465293950  | -0.859484999 | 0.294404194  |
| C | -9.860701373  | -0.498414283 | 0.327253383  |
| H | -10.170936503 | 0.288020451  | -0.372554659 |
| O | -10.438118507 | -0.288758719 | 1.608056782  |
| H | -10.129769593 | 0.563817192  | 1.952145857  |
| H | -10.275744598 | -1.444532090 | -0.035228239 |

---

Structure: **TS2**

Charge = 0 Multiplicity = 2

Number of imaginary frequencies: 0

SCF Energy: -934.055298477 hartree

SCF Energy + ZPVE: -933.816873477 hartree

Free Energy: -933.860938 hartree

Structure: **4**

Charge = 0 Multiplicity = 2

Number of imaginary frequencies: 0

SCF Energy: -934.080903980 hartree

SCF Energy + ZPVE: -933.838809980 hartree

Free Energy: -933.886360 hartree

|   |              |              |              |
|---|--------------|--------------|--------------|
| C | -6.029078920 | 2.574378334  | 0.608854259  |
| C | -6.544544868 | 2.296679113  | 1.875777335  |
| C | -5.720744370 | 2.023746185  | 2.952527699  |
| C | -4.340229095 | 2.036317329  | 2.716558582  |
| C | -3.823848294 | 2.313260082  | 1.447350324  |
| C | -4.667907445 | 2.590166602  | 0.364442595  |
| C | -7.167517784 | 2.790898222  | -0.324679812 |
| H | -6.127679920 | 1.799480516  | 3.933338256  |
| H | -3.657903978 | 1.823250178  | 3.532825441  |
| H | -2.749143243 | 2.310168521  | 1.298231020  |
| H | -4.273609490 | 2.797454477  | -0.625200783 |
| N | -8.304583653 | 2.685603555  | 0.476604906  |
| O | -9.566001847 | 2.782729032  | -0.020337625 |
| O | -7.179412151 | 3.015642400  | -1.516488191 |
| O | -8.871267954 | 2.079907999  | 2.635462874  |
| C | -8.030782850 | 2.319251178  | 1.794105967  |
| C | -6.318561648 | -0.502874660 | -0.968795970 |

---

|   |               |              |              |
|---|---------------|--------------|--------------|
| C | -7.686374887  | -0.386700973 | -0.794297731 |
| C | -8.282457906  | -0.611782477 | 0.479364820  |
| C | -7.429069728  | -0.957785127 | 1.560649874  |
| C | -6.057553212  | -1.076495721 | 1.364705248  |
| C | -5.488287663  | -0.851548526 | 0.108593930  |
| H | -5.886718267  | -0.315190623 | -1.947775138 |
| H | -8.324601854  | -0.108863562 | -1.630127660 |
| H | -7.833162111  | -1.142598933 | 2.552652247  |
| H | -5.423608765  | -1.341578437 | 2.206160551  |
| H | -4.415592968  | -0.937868451 | -0.031503873 |
| C | -9.684153884  | -0.464967043 | 0.599985428  |
| H | -9.831958844  | 1.882761492  | -0.291185115 |
| O | -10.384244533 | -0.588896931 | 1.755261276  |
| H | -9.801358510  | -0.591790457 | 2.529905262  |
| H | -10.321157286 | -0.329594684 | -0.267607236 |

Structure: **II**

Charge = 0 Multiplicity = 2

Number of imaginary frequencies: 0

SCF Energy: -346.007996069 hartree

SCF Energy + ZPVE: -345.887373069 hartree

Free Energy: -345.918805 hartree

|   |              |              |              |
|---|--------------|--------------|--------------|
| C | -6.994652733 | -4.616726906 | -6.218356748 |
| C | -6.288983294 | -3.888813474 | -5.274994880 |
| C | -6.145148117 | -4.371200767 | -3.944819540 |
| C | -6.744167552 | -5.617462990 | -3.615902480 |
| C | -7.447755175 | -6.332790367 | -4.575618511 |
| C | -7.581885308 | -5.845105718 | -5.880847594 |
| H | -7.094089287 | -4.229203752 | -7.228200819 |
| H | -5.836694195 | -2.936959349 | -5.541981987 |

---

|   |              |              |              |
|---|--------------|--------------|--------------|
| H | -6.647258111 | -6.007901328 | -2.607855167 |
| H | -7.899171331 | -7.283547290 | -4.305848417 |
| H | -8.134088008 | -6.411021352 | -6.624071837 |
| C | -5.426330816 | -3.610629555 | -3.002697948 |
| H | -4.967319642 | -2.657489884 | -3.240020545 |
| O | -5.297362949 | -4.075882065 | -1.731495883 |
| H | -4.788245631 | -3.447258503 | -1.200956714 |

Structure: **1a**

Charge = 0 Multiplicity = 1

Number of imaginary frequencies: 0

SCF Energy: -363.688270823 hartree

SCF Energy + ZPVE: -363.557591823 hartree

Free Energy: -363.587839 hartree

|   |              |              |              |
|---|--------------|--------------|--------------|
| C | -2.408575268 | 0.342355699  | -0.061585380 |
| C | -3.734200155 | 0.542303418  | 0.403093240  |
| C | -4.221776948 | 1.805242421  | 0.763119876  |
| C | -3.352636895 | 2.879616258  | 0.650613391  |
| C | -2.027463567 | 2.705916981  | 0.191246240  |
| C | -1.550181051 | 1.453726557  | -0.163977894 |
| C | -2.270670416 | -1.063100165 | -0.330084458 |
| C | -3.476174417 | -1.642062846 | -0.028605062 |
| H | -5.240511151 | 1.932631382  | 1.116587428  |
| H | -3.695470303 | 3.873560988  | 0.921532309  |
| H | -1.375207864 | 3.570968646  | 0.118529523  |
| H | -0.530250549 | 1.329054687  | -0.517040145 |
| H | -1.391684562 | -1.574686595 | -0.696355975 |
| N | -4.356849747 | -0.683013184 | 0.413328064  |
| H | -3.786553168 | -2.675689977 | -0.090710677 |
| H | -5.314301399 | -0.852545248 | 0.690294299  |

---

Structure: **III**

Charge = 1 Multiplicity = 2

Number of imaginary frequencies: 0

SCF Energy: -363.481281415 hartree

SCF Energy + ZPVE: -363.350800415 hartree

Free Energy: -363.381772 hartree

|   |              |              |              |
|---|--------------|--------------|--------------|
| C | -2.406414640 | 0.351194254  | -0.061741831 |
| C | -3.734010744 | 0.551808758  | 0.403504159  |
| C | -4.225958697 | 1.780709670  | 0.760780870  |
| C | -3.334089549 | 2.870682350  | 0.643417471  |
| C | -2.019905500 | 2.712300569  | 0.189254119  |
| C | -1.536044941 | 1.457486227  | -0.168981816 |
| C | -2.261860838 | -1.021310618 | -0.325341092 |
| C | -3.517395380 | -1.632433899 | -0.014385021 |
| H | -5.241749425 | 1.917117184  | 1.115201421  |
| H | -3.685829529 | 3.859948911  | 0.917069256  |
| H | -1.373287968 | 3.579696123  | 0.119418904  |
| H | -0.518868379 | 1.323644474  | -0.522043861 |
| H | -1.389719258 | -1.546127413 | -0.689940364 |
| N | -4.361556190 | -0.707960320 | 0.409662390  |
| H | -3.801453386 | -2.673694793 | -0.086285294 |
| H | -5.324362576 | -0.878782476 | 0.690394691  |

Structure: **5**

Charge = 1 Multiplicity = 1

Number of imaginary frequencies: 0

SCF Energy: -709.558665211 hartree

SCF Energy + ZPVE: -709.301688211 hartree

Free Energy: -709.345202 hartree



---

|   |              |              |              |
|---|--------------|--------------|--------------|
| C | -2.241272524 | 0.360408735  | 0.140873110  |
| C | -3.629940796 | 0.235939909  | 0.402434463  |
| C | -4.464092073 | 1.348211802  | 0.573770133  |
| C | -3.882959616 | 2.602577997  | 0.465446462  |
| C | -2.504010322 | 2.752343543  | 0.195067265  |
| C | -1.680351161 | 1.648184108  | 0.034860076  |
| C | -1.723625197 | -0.972438524 | -0.004448582 |
| C | -2.783068674 | -1.827259378 | 0.177014724  |
| H | -5.523990082 | 1.227591614  | 0.776099015  |
| H | -4.499674999 | 3.487787551  | 0.587375940  |
| H | -2.086100313 | 3.751085453  | 0.113222611  |
| H | -0.620339448 | 1.770783113  | -0.170969681 |
| H | -0.702501386 | -1.257437766 | -0.217798983 |
| N | -3.924969934 | -1.108058326 | 0.425862910  |
| H | -2.816922182 | -2.907462303 | 0.144220521  |
| H | -4.841857071 | -1.506174293 | 0.580271256  |
| C | -2.971294936 | -4.095773730 | -3.789086983 |
| C | -3.177614113 | -2.822335920 | -3.280171912 |
| C | -2.190361715 | -1.835431256 | -3.466554196 |
| C | -0.995689117 | -2.121647480 | -4.158748872 |
| C | -0.801657149 | -3.397217862 | -4.659454613 |
| C | -1.786552704 | -4.377525833 | -4.473871342 |
| H | -3.721520652 | -4.866787651 | -3.654572609 |
| H | -4.086120729 | -2.574949387 | -2.737662344 |
| H | -0.246180706 | -1.348087245 | -4.290870560 |
| H | 0.109548526  | -3.640001257 | -5.194836657 |
| H | -1.624604208 | -5.374958946 | -4.871264861 |
| C | -2.452622124 | -0.548306509 | -2.924987516 |
| H | -3.388693146 | -0.342316742 | -2.401572855 |
| O | -1.620271792 | 0.408822429  | -3.080043421 |

---

|   |              |             |              |
|---|--------------|-------------|--------------|
| H | -1.916658657 | 1.240366051 | -2.657135697 |
|---|--------------|-------------|--------------|

Structure: **TS3**

Charge = 1 Multiplicity = 1

Number of imaginary frequencies: 1

SCF Energy: -709.554660388 hartree

SCF Energy + ZPVE: -709.298424388 hartree

Free Energy: -709.340392 hartree

|   |              |              |              |
|---|--------------|--------------|--------------|
| C | -2.325934229 | 0.487620790  | -0.092453685 |
| C | -3.623376779 | 0.392541911  | 0.457323539  |
| C | -4.332828513 | 1.503239289  | 0.914845376  |
| C | -3.706299272 | 2.738667676  | 0.806057087  |
| C | -2.414254661 | 2.860004884  | 0.256734413  |
| C | -1.716314863 | 1.747249320  | -0.197190777 |
| C | -1.947418816 | -0.844278464 | -0.504996178 |
| C | -2.993615867 | -1.679038121 | -0.114816070 |
| H | -5.329073477 | 1.402494580  | 1.333282264  |
| H | -4.222844165 | 3.628929619  | 1.150676039  |
| H | -1.958831079 | 3.842913933  | 0.187531875  |
| H | -0.718903576 | 1.846012641  | -0.615687753 |
| H | -0.965502373 | -1.175378230 | -0.814476853 |
| N | -3.987997258 | -0.947296729 | 0.427682591  |
| H | -3.093866042 | -2.750878858 | -0.223117893 |
| H | -4.878610590 | -1.319354579 | 0.737939576  |
| C | -2.798834125 | -4.298598180 | -3.708196344 |
| C | -3.124515127 | -3.048271194 | -3.196997126 |
| C | -2.175334689 | -2.016707195 | -3.233897587 |
| C | -0.897803483 | -2.237721392 | -3.769511708 |
| C | -0.577791576 | -3.493942306 | -4.269016881 |
| C | -1.526576360 | -4.520203510 | -4.240883797 |

---

|   |              |              |              |
|---|--------------|--------------|--------------|
| H | -3.530345796 | -5.099657659 | -3.690703081 |
| H | -4.106963453 | -2.860250388 | -2.770800028 |
| H | -0.170365882 | -1.432087318 | -3.789249873 |
| H | 0.407962822  | -3.675454794 | -4.684249523 |
| H | -1.271861722 | -5.499235975 | -4.635073060 |
| C | -2.567091621 | -0.709677387 | -2.740757765 |
| H | -3.599834773 | -0.523317681 | -2.449142964 |
| O | -1.836663738 | 0.310725138  | -3.087396478 |
| H | -2.239319917 | 1.158164178  | -2.822641335 |

Structure: **IV**

Charge = 1 Multiplicity = 1

Number of imaginary frequencies: 0

SCF Energy: -709.581777789 hartree

SCF Energy + ZPVE: -709.322687789 hartree

Free Energy: -709.363852 hartree

|   |              |              |              |
|---|--------------|--------------|--------------|
| C | -2.499754703 | 0.724455480  | -0.108625811 |
| C | -3.545447296 | 0.521279727  | 0.792901735  |
| C | -4.200641700 | 1.532000240  | 1.474076363  |
| C | -3.756489945 | 2.829369353  | 1.215939733  |
| C | -2.703437589 | 3.067691534  | 0.325999522  |
| C | -2.060469934 | 2.021777841  | -0.344149543 |
| C | -2.073683615 | -0.618331468 | -0.642801042 |
| C | -2.973650340 | -1.541281301 | 0.102466198  |
| H | -5.007725532 | 1.322633920  | 2.167724568  |
| H | -4.232017943 | 3.663950585  | 1.719971823  |
| H | -2.374017141 | 4.087498550  | 0.155351980  |
| H | -1.233069623 | 2.224488678  | -1.016406520 |
| H | -1.028764568 | -0.862250120 | -0.402046910 |
| N | -3.775173621 | -0.879909868 | 0.868906103  |

---

|   |              |              |              |
|---|--------------|--------------|--------------|
| H | -3.013349421 | -2.623368108 | 0.039797668  |
| H | -4.484214159 | -1.309309650 | 1.465628649  |
| C | -2.595498613 | -4.391435377 | -3.369186118 |
| C | -2.911440269 | -3.084492370 | -2.995230081 |
| C | -1.901864365 | -2.199357452 | -2.613097763 |
| C | -0.571061513 | -2.629039724 | -2.608183078 |
| C | -0.254967348 | -3.931602138 | -2.988609896 |
| C | -1.267305414 | -4.815894296 | -3.367351339 |
| H | -3.386243329 | -5.073473454 | -3.666161300 |
| H | -3.945751664 | -2.749116497 | -3.001095135 |
| H | 0.217869589  | -1.943276941 | -2.309668168 |
| H | 0.780372257  | -4.258258633 | -2.987013040 |
| H | -1.020336783 | -5.831640932 | -3.660647805 |
| C | -2.247946235 | -0.791969066 | -2.187692223 |
| H | -3.294144501 | -0.579869573 | -2.435133291 |
| O | -1.389296550 | 0.114331134  | -2.853133173 |
| H | -1.797569479 | 0.991420673  | -2.860239458 |

Structure: **TS4**

Charge = 1 Multiplicity = 2

Number of imaginary frequencies: 1

SCF Energy: -1296.987832350 hartree

SCF Energy + ZPVE: -1296.625553350 hartree

Free Energy: -1296.680639 hartree

|   |              |              |              |
|---|--------------|--------------|--------------|
| C | -2.959181466 | -1.991992852 | -0.436118619 |
| C | -3.558044805 | -2.879520119 | 0.474444789  |
| C | -3.654769643 | -2.629009950 | 1.830500544  |
| C | -3.141567523 | -1.402356437 | 2.271720191  |
| C | -2.571497375 | -0.482585193 | 1.381527741  |
| C | -2.464530615 | -0.766015291 | 0.019656066  |

---

|   |              |              |              |
|---|--------------|--------------|--------------|
| C | -2.936633061 | -2.656793041 | -1.738215456 |
| C | -3.683199153 | -3.888742478 | -1.525388788 |
| H | -4.104663141 | -3.341807080 | 2.513005280  |
| H | -3.192087038 | -1.159900710 | 3.328174694  |
| H | -2.192797424 | 0.460432052  | 1.761652038  |
| H | -1.999812688 | -0.063798636 | -0.666285568 |
| N | -3.984378097 | -4.008032980 | -0.257901688 |
| H | -3.922599515 | -4.660960701 | -2.246168753 |
| H | -4.429587053 | -4.826739251 | 0.155231391  |
| C | -6.615652914 | -1.192399871 | -3.730061345 |
| C | -5.411274864 | -1.877331184 | -3.580971036 |
| C | -4.243478407 | -1.178563194 | -3.257883718 |
| C | -4.290490055 | 0.205079021  | -3.081921799 |
| C | -5.498220244 | 0.889895465  | -3.225947685 |
| C | -6.661376959 | 0.192085369  | -3.550133780 |
| H | -7.518735665 | -1.737966427 | -3.985778368 |
| H | -5.376450975 | -2.954844537 | -3.724450977 |
| H | -3.379774994 | 0.746275353  | -2.836798352 |
| H | -5.527766298 | 1.966628262  | -3.090844746 |
| H | -7.600548279 | 0.724036928  | -3.666082880 |
| C | -2.932508356 | -1.920404440 | -3.063111998 |
| H | -2.112677380 | -1.191133109 | -3.031888426 |
| O | -2.697629893 | -2.901246368 | -4.058239729 |
| H | -2.676162702 | -2.462732133 | -4.921048716 |
| H | -1.735799656 | -3.218597603 | -1.725094612 |
| C | 0.561475748  | -1.721215279 | 1.264881238  |
| C | 0.009411363  | -2.853826896 | 1.877611936  |
| C | -0.075685340 | -2.966009027 | 3.255758675  |
| C | 0.416533180  | -1.897684094 | 4.012632992  |
| C | 0.970156801  | -0.768082560 | 3.399960955  |

---

|   |              |              |              |
|---|--------------|--------------|--------------|
| C | 1.050514211  | -0.660694075 | 2.006760498  |
| C | 0.434352130  | -1.852228293 | -0.202582980 |
| H | -0.515574653 | -3.841084481 | 3.722680529  |
| H | 0.364024579  | -1.942229264 | 5.095230118  |
| H | 1.338335468  | 0.043617200  | 4.018513825  |
| H | 1.466902830  | 0.218469809  | 1.526565946  |
| N | -0.157912219 | -3.138313988 | -0.396546978 |
| O | -0.542431286 | -3.583438544 | -1.548686568 |
| O | 0.715403292  | -1.110178566 | -1.109862483 |
| O | -1.039874632 | -4.846964674 | 0.900967807  |
| C | -0.476795651 | -3.782065876 | 0.837914135  |

Structure: **6**

Charge = 1 Multiplicity = 2

Number of imaginary frequencies: 0

SCF Energy: -1297.032464290 hartree

SCF Energy + ZPVE: -1296.664369290 hartree

Free Energy: -1296.718859 hartree

|   |              |              |              |
|---|--------------|--------------|--------------|
| C | -2.919099699 | 1.511619951  | -1.607145820 |
| C | -1.858736670 | 1.339473669  | -0.680974957 |
| C | -0.974263763 | 2.338243684  | -0.349336338 |
| C | -1.165611346 | 3.579694385  | -0.987216051 |
| C | -2.202154614 | 3.788212917  | -1.907179671 |
| C | -3.088543573 | 2.766750908  | -2.232616757 |
| C | -3.608429876 | 0.276466070  | -1.680202512 |
| C | -2.929826876 | -0.619218077 | -0.786097096 |
| H | -0.171226960 | 2.182303800  | 0.363029110  |
| H | -0.484733979 | 4.393725853  | -0.759899486 |
| H | -2.308133428 | 4.759354378  | -2.378357824 |
| H | -3.884660255 | 2.922013885  | -2.951943331 |

---

|   |              |              |              |
|---|--------------|--------------|--------------|
| N | -1.924501570 | 0.014727551  | -0.212796827 |
| H | -3.152845100 | -1.656205163 | -0.568716253 |
| H | -1.278644564 | -0.398960900 | 0.455752426  |
| C | -6.081219104 | -3.618275965 | -1.980339252 |
| C | -5.930195227 | -2.237526107 | -1.844484842 |
| C | -5.026181700 | -1.548394815 | -2.653485328 |
| C | -4.271752497 | -2.243892108 | -3.602680287 |
| C | -4.428676919 | -3.621578507 | -3.742125435 |
| C | -5.330650039 | -4.311047570 | -2.929387327 |
| H | -6.788500544 | -4.148842333 | -1.350403428 |
| H | -6.517547692 | -1.692635252 | -1.109368151 |
| H | -3.567323245 | -1.709308693 | -4.234075327 |
| H | -3.844894291 | -4.157761955 | -4.484027339 |
| H | -5.450721106 | -5.384468264 | -3.039921817 |
| C | -4.840622118 | -0.056554268 | -2.461413503 |
| H | -5.694461060 | 0.328501177  | -1.882605679 |
| O | -4.756246855 | 0.664379989  | -3.688339188 |
| H | -5.576442491 | 0.533727639  | -4.188900013 |
| H | -3.393060909 | 0.531988048  | -4.639116504 |
| C | 0.167661260  | 2.253548938  | -3.844230557 |
| C | 0.337259413  | 1.007087476  | -3.239388510 |
| C | 1.363408723  | 0.763888436  | -2.344713782 |
| C | 2.231257810  | 1.828256482  | -2.069091200 |
| C | 2.061281554  | 3.077168077  | -2.673296950 |
| C | 1.017704434  | 3.311382885  | -3.578389451 |
| C | -1.044959956 | 2.195067785  | -4.707334258 |
| H | 1.483485903  | -0.205474012 | -1.871112871 |
| H | 3.047394878  | 1.683314623  | -1.368836800 |
| H | 2.748415988  | 3.882040075  | -2.433427401 |
| H | 0.874040248  | 4.282709252  | -4.041156329 |

---

|   |              |              |              |
|---|--------------|--------------|--------------|
| N | -1.519048052 | 0.892922718  | -4.566313018 |
| O | -2.600605489 | 0.418717910  | -5.235796493 |
| O | -1.561116338 | 3.050628341  | -5.396305976 |
| O | -1.021166299 | -1.033439868 | -3.390289913 |
| C | -0.765409006 | 0.114899956  | -3.692253685 |

Structure: **TS5**

Charge = 1 Multiplicity = 2

Number of imaginary frequencies: 1

SCF Energy: -1296.999037140 hartree

SCF Energy + ZPVE: -1296.635944140 hartree

Free Energy: -1296.689028 hartree

Structure: **V**

Charge = 1 Multiplicity = 1

Number of imaginary frequencies: 0

SCF Energy: -633.169828830 hartree

SCF Energy + ZPVE: -632.938493830 hartree

Free Energy: -632.977230 hartree

|   |              |              |              |
|---|--------------|--------------|--------------|
| C | -2.219106097 | 0.525050070  | -1.138454932 |
| C | -0.876406817 | 0.179616068  | -1.333406771 |
| C | 0.187968383  | 0.977462269  | -0.938012423 |
| C | -0.141307100 | 2.180319842  | -0.316778863 |
| C | -1.479234965 | 2.552103800  | -0.111929846 |
| C | -2.531658152 | 1.735869166  | -0.522003426 |
| C | -3.023433116 | -0.564048887 | -1.702303408 |
| C | -2.069795855 | -1.523807758 | -2.190670986 |
| H | 1.216800865  | 0.677481806  | -1.105999572 |
| H | 0.652430451  | 2.842101132  | 0.013706145  |
| H | -1.696941198 | 3.496951517  | 0.375426450  |



---

|   |              |              |              |
|---|--------------|--------------|--------------|
| H | -3.563794047 | 2.033895933  | -0.365098368 |
| N | -0.854962918 | -1.078557577 | -1.968426383 |
| H | -2.230301827 | -2.504067658 | -2.620030899 |
| H | -0.007206631 | -1.596682986 | -2.191140256 |
| C | -7.364320575 | -2.828851133 | -2.238701305 |
| C | -6.505581737 | -1.869257954 | -1.717803791 |
| C | -5.241118898 | -1.653706520 | -2.299618304 |
| C | -4.883521610 | -2.371648094 | -3.457240507 |
| C | -5.754288828 | -3.317321907 | -3.983284127 |
| C | -6.987138733 | -3.556184301 | -3.369365219 |
| H | -8.330058664 | -3.001423342 | -1.775225916 |
| H | -6.792583447 | -1.290445948 | -0.844554974 |
| H | -3.955044115 | -2.151607147 | -3.973807476 |
| H | -5.481239049 | -3.858693193 | -4.883092881 |
| H | -7.663883864 | -4.294794916 | -3.787679952 |
| C | -4.386572830 | -0.665644467 | -1.676240013 |
| H | -4.905418623 | 0.092351185  | -1.088512998 |

Structure: 7

Charge = 1 Multiplicity = 1

Number of imaginary frequencies: 0

SCF Energy: -996.886198542 hartree

SCF Energy + ZPVE: -996.520582542 hartree

Free Energy: -996.568637 hartree

|   |              |             |              |
|---|--------------|-------------|--------------|
| C | -1.406843278 | 0.542716513 | -1.004098045 |
| C | -2.247610108 | 0.340600352 | 0.118678658  |
| C | -2.465571044 | 1.333306872 | 1.082164601  |
| C | -1.821275920 | 2.548061642 | 0.902174971  |
| C | -0.985060601 | 2.776695640 | -0.212910521 |
| C | -0.774198588 | 1.790456273 | -1.165011754 |

---

|   |              |              |              |
|---|--------------|--------------|--------------|
| C | -1.425994334 | -0.679243340 | -1.770209861 |
| C | -2.260372582 | -1.540193700 | -1.100057128 |
| H | -3.115607948 | 1.154208763  | 1.933001600  |
| H | -1.965943071 | 3.340955457  | 1.629417961  |
| H | -0.504167422 | 3.743334084  | -0.325694110 |
| H | -0.140127603 | 1.986937658  | -2.025465494 |
| N | -2.752798660 | -0.933777025 | 0.029622352  |
| H | -2.553468144 | -2.552723518 | -1.337621264 |
| H | -3.401021570 | -1.355208795 | 0.680988728  |
| C | -1.728122974 | -3.275759342 | -5.809136771 |
| C | -1.425756233 | -2.125409081 | -5.080032703 |
| C | -0.983516228 | -2.208744673 | -3.754836281 |
| C | -0.847004996 | -3.476905866 | -3.171421565 |
| C | -1.145546556 | -4.627880865 | -3.900670834 |
| C | -1.586628955 | -4.531932023 | -5.220980945 |
| H | -2.071456351 | -3.188188023 | -6.835380233 |
| H | -1.531402869 | -1.148285312 | -5.544910579 |
| H | -0.512817140 | -3.574357609 | -2.142261159 |
| H | -1.034648230 | -5.601338267 | -3.432729950 |
| H | -1.819361410 | -5.429646729 | -5.785310126 |
| C | -0.626138462 | -0.930171288 | -3.016381813 |
| H | -0.789850792 | -0.095647900 | -3.708316026 |
| C | 1.436417931  | -1.871036494 | -1.692200460 |
| C | 2.384335091  | -2.670424961 | -2.331091719 |
| C | 3.053842259  | -3.721860202 | -1.728415001 |
| C | 2.733862323  | -3.962701891 | -0.391516686 |
| C | 1.798633707  | -3.167898353 | 0.282589884  |
| C | 1.141392971  | -2.111408551 | -0.355121558 |
| C | 0.913697532  | -0.873244707 | -2.689059819 |
| C | 1.713053798  | -1.206441600 | -3.899137631 |

---

|   |             |              |              |
|---|-------------|--------------|--------------|
| H | 3.783082223 | -4.318452144 | -2.265522186 |
| H | 3.224067577 | -4.774993952 | 0.134358641  |
| H | 1.580277899 | -3.376806628 | 1.324817510  |
| H | 0.420250751 | -1.501046652 | 0.179363787  |
| H | 1.151403203 | 0.158064016  | -2.394058142 |
| N | 2.503974776 | -2.201943174 | -3.669206959 |
| H | 1.666811043 | -0.727611688 | -4.871069600 |
| H | 3.135746144 | -2.606925484 | -4.361298128 |

Structure: **TS6**

Charge = 1 Multiplicity = 1

Number of imaginary frequencies: 1

SCF Energy: -996.864553783 hartree

SCF Energy + ZPVE: -996.501102783 hartree

Free Energy: -996.548473 hartree

|   |              |              |              |
|---|--------------|--------------|--------------|
| C | -1.518657940 | 0.570536719  | -1.009961722 |
| C | -2.100395365 | 0.343376370  | 0.252504441  |
| C | -2.299065109 | 1.358489800  | 1.188556655  |
| C | -1.886888753 | 2.635275310  | 0.827351503  |
| C | -1.300587924 | 2.887146959  | -0.428792285 |
| C | -1.110853806 | 1.867277787  | -1.353482922 |
| C | -1.473087831 | -0.710102232 | -1.691334621 |
| C | -2.031429843 | -1.635685621 | -0.800620756 |
| H | -2.753123685 | 1.154939142  | 2.152920015  |
| H | -2.020305780 | 3.454871730  | 1.526057644  |
| H | -0.993832864 | 3.898282487  | -0.676620245 |
| H | -0.663657782 | 2.072132137  | -2.322575140 |
| N | -2.407088313 | -1.008636950 | 0.329064144  |
| H | -2.230963820 | -2.690540638 | -0.922231925 |
| H | -2.867428014 | -1.458431653 | 1.112277744  |

---

|   |              |              |              |
|---|--------------|--------------|--------------|
| C | -1.287644546 | -3.313777931 | -5.854091619 |
| C | -1.196403282 | -2.145870691 | -5.106059174 |
| C | -1.000945905 | -2.199133208 | -3.714734710 |
| C | -0.853295077 | -3.450936369 | -3.096451993 |
| C | -0.933999175 | -4.619865723 | -3.851103785 |
| C | -1.157630810 | -4.555449424 | -5.225904969 |
| H | -1.452483836 | -3.258182483 | -6.925282365 |
| H | -1.282167089 | -1.177638903 | -5.592494962 |
| H | -0.638281096 | -3.520396419 | -2.034594070 |
| H | -0.811440986 | -5.581388039 | -3.362505177 |
| H | -1.219733146 | -5.468523189 | -5.809709472 |
| C | -0.929839773 | -0.925989489 | -2.987116682 |
| H | -0.916927785 | -0.046687036 | -3.628024398 |
| C | 1.487419591  | -1.732210208 | -1.684690396 |
| C | 2.065051176  | -2.749655309 | -2.469441559 |
| C | 2.378015425  | -4.010558085 | -1.968531680 |
| C | 2.073232598  | -4.244300494 | -0.631348068 |
| C | 1.481430262  | -3.249365973 | 0.170352605  |
| C | 1.183564084  | -1.989916134 | -0.342198192 |
| C | 1.207454146  | -0.623426822 | -2.570526812 |
| C | 1.728116807  | -0.997674343 | -3.822692144 |
| H | 2.818216575  | -4.776853081 | -2.598365059 |
| H | 2.293536800  | -5.214399061 | -0.197562306 |
| H | 1.257317654  | -3.471993705 | 1.208870505  |
| H | 0.730534170  | -1.223211408 | 0.280801307  |
| H | 1.030210287  | 0.403342254  | -2.279162867 |
| N | 2.194231796  | -2.249525423 | -3.765934719 |
| H | 1.739309714  | -0.440336692 | -4.749973912 |
| H | 2.550471251  | -2.773405956 | -4.558620856 |

---

Structure: VI

Charge = 1 Multiplicity = 1

Number of imaginary frequencies: 0

SCF Energy: -996.886169228 hartree

SCF Energy + ZPVE: -996.520524228 hartree

Free Energy: -996.568590 hartree

|   |              |              |              |
|---|--------------|--------------|--------------|
| C | -1.565501944 | 0.549535308  | -1.033382231 |
| C | -2.417335660 | 0.368476740  | 0.084588820  |
| C | -2.612820544 | 1.365056073  | 1.048926981  |
| C | -1.934646764 | 2.562046051  | 0.874360291  |
| C | -1.086360516 | 2.769516262  | -0.235768300 |
| C | -0.897579883 | 1.779505543  | -1.188630762 |
| C | -1.615557683 | -0.669427367 | -1.802823796 |
| C | -2.477242588 | -1.508195105 | -1.139158995 |
| H | -3.272117919 | 1.202665870  | 1.895974436  |
| H | -2.061407117 | 3.357377693  | 1.602301723  |
| H | -0.578472332 | 3.722782034  | -0.344046529 |
| H | -0.253529359 | 1.959435605  | -2.045412830 |
| N | -2.957664947 | -0.891010811 | -0.010134881 |
| H | -2.797700728 | -2.511387667 | -1.381029296 |
| H | -3.621476241 | -1.295228720 | 0.636412547  |
| C | -1.992893755 | -3.223801295 | -5.858866339 |
| C | -1.651945033 | -2.090391693 | -5.120348767 |
| C | -1.214646875 | -2.199391879 | -3.795297311 |
| C | -1.123156881 | -3.476055857 | -3.221631300 |
| C | -1.460262970 | -4.610184365 | -3.960371236 |
| C | -1.895969365 | -4.488655454 | -5.280367488 |
| H | -2.331562862 | -3.116403320 | -6.884782112 |
| H | -1.722795015 | -1.106500555 | -5.577478850 |
| H | -0.793754984 | -3.593456349 | -2.192995160 |

---

|   |              |              |              |
|---|--------------|--------------|--------------|
| H | -1.383799857 | -5.590606351 | -3.500172955 |
| H | -2.158656146 | -5.373378301 | -5.852016127 |
| C | -0.817116719 | -0.939370371 | -3.045797336 |
| H | -0.947973795 | -0.094787513 | -3.732521812 |
| C | 1.204983234  | -1.959615774 | -1.717879245 |
| C | 2.130409690  | -2.783496532 | -2.358644853 |
| C | 2.760811939  | -3.862438975 | -1.762478217 |
| C | 2.424030603  | -4.105684243 | -0.430132734 |
| C | 1.511117502  | -3.286982946 | 0.246018414  |
| C | 0.893364957  | -2.203045052 | -0.385146625 |
| C | 0.721651333  | -0.935802751 | -2.708092214 |
| C | 1.517586775  | -1.283201028 | -3.916334403 |
| H | 3.473544642  | -4.477514485 | -2.300880852 |
| H | 2.883676160  | -4.938882412 | 0.090630895  |
| H | 1.279196968  | -3.498773871 | 1.284725473  |
| H | 0.189349334  | -1.574312368 | 0.150850089  |
| H | 0.989567027  | 0.084567924  | -2.400855695 |
| N | 2.274045753  | -2.306175986 | -3.691207182 |
| H | 1.492741710  | -0.794118045 | -4.883917542 |
| H | 2.896740970  | -2.724934462 | -4.383376934 |

Structure: **8**

Charge = 1 Multiplicity = 2

Number of imaginary frequencies: 0

SCF Energy: -1584.317478410 hartree

SCF Energy + ZPVE: -1583.842879410 hartree

Free Energy: -1583.907316 hartree

|   |              |              |              |
|---|--------------|--------------|--------------|
| C | -0.348402174 | -0.601164415 | -4.519748338 |
| C | 0.101663325  | 0.737202780  | -4.400374752 |
| C | 0.706568545  | 1.420603605  | -5.462128191 |

---

|   |              |              |              |
|---|--------------|--------------|--------------|
| C | 0.845755039  | 0.736859952  | -6.662597806 |
| C | 0.394180315  | -0.594036992 | -6.807924949 |
| C | -0.195526706 | -1.269200883 | -5.748993106 |
| C | -0.911121292 | -0.972694154 | -3.246035552 |
| C | -0.789491441 | 0.129167146  | -2.435268921 |
| H | 1.059038523  | 2.441408453  | -5.345429969 |
| H | 1.317577839  | 1.234150342  | -7.505688510 |
| H | 0.522420679  | -1.094577985 | -7.763001929 |
| H | -0.534212034 | -2.295835511 | -5.866590359 |
| N | -0.182405437 | 1.152742424  | -3.122762714 |
| H | -1.090496666 | 0.278722692  | -1.408009795 |
| H | 0.003418018  | 2.073512622  | -2.748279384 |
| C | -4.611341791 | -2.937987607 | -0.897574651 |
| C | -3.703667322 | -2.846677437 | -1.952502033 |
| C | -2.393188601 | -2.402506426 | -1.740066625 |
| C | -2.005678782 | -2.057135866 | -0.437364456 |
| C | -2.912605684 | -2.149153878 | 0.618705036  |
| C | -4.217349197 | -2.588343866 | 0.393250600  |
| H | -5.623625930 | -3.282888684 | -1.085787210 |
| H | -4.014022964 | -3.123745675 | -2.957075446 |
| H | -0.996581436 | -1.708919027 | -0.236968520 |
| H | -2.596606388 | -1.873827952 | 1.620412537  |
| H | -4.920620213 | -2.657404537 | 1.217524379  |
| C | -1.447654955 | -2.337899315 | -2.926714331 |
| H | -2.007275662 | -2.686987328 | -3.802361161 |
| C | 0.696458924  | -3.149817118 | -1.645990978 |
| C | 0.636012053  | -4.268910185 | -0.815669271 |
| C | 1.353617737  | -4.412378807 | 0.359746838  |
| C | 2.184125133  | -3.344675220 | 0.701823289  |
| C | 2.275139957  | -2.210957484 | -0.114831262 |

---

|   |              |              |              |
|---|--------------|--------------|--------------|
| C | 1.538276908  | -2.099356324 | -1.297183796 |
| C | -0.258419763 | -3.361661962 | -2.790724220 |
| C | -0.785467354 | -4.722598817 | -2.496647807 |
| H | 1.273738263  | -5.304153173 | 0.972055619  |
| H | 2.771015340  | -3.397435621 | 1.612749921  |
| H | 2.934360711  | -1.399537587 | 0.176910633  |
| H | 1.623155860  | -1.217356930 | -1.922010323 |
| N | -0.280138328 | -5.185699370 | -1.401368568 |
| H | -1.511364731 | -5.286786734 | -3.072449642 |
| H | -0.509859322 | -6.096130279 | -0.999994830 |
| C | 4.129609672  | -0.055764914 | -6.685285609 |
| C | 4.107105651  | 0.797795387  | -5.574442677 |
| C | 4.638189697  | 2.075320955  | -5.630705973 |
| C | 5.203066690  | 2.478127401  | -6.845421404 |
| C | 5.226501617  | 1.625432594  | -7.954461365 |
| C | 4.686315599  | 0.336917349  | -7.890996674 |
| C | 3.464930554  | -1.326711894 | -6.341192579 |
| H | 4.613241358  | 2.733217950  | -4.768378904 |
| H | 5.628969802  | 3.472201299  | -6.932124322 |
| H | 5.670632898  | 1.972876238  | -8.881347055 |
| H | 4.696424040  | -0.327101598 | -8.748897689 |
| N | 3.055550379  | -1.167888089 | -4.967388242 |
| O | 2.441817887  | -2.045181281 | -4.308564097 |
| O | 3.263940636  | -2.334487858 | -6.968685064 |
| O | 3.200356923  | 0.467027539  | -3.318172338 |
| C | 3.428355124  | 0.125057562  | -4.450061108 |
| H | 0.259452480  | -3.388313506 | -3.761276347 |

Structure: **TS7**

Charge = 1 Multiplicity = 2



---

Number of imaginary frequencies: 1

SCF Energy: -1584.291057090 hartree

SCF Energy + ZPVE: -1583.821889090 hartree

Free Energy: -1583.883080 hartree

|   |              |              |              |
|---|--------------|--------------|--------------|
| C | -2.900263730 | -1.893326774 | -0.510462080 |
| C | -3.379682774 | -2.659630336 | 0.564490586  |
| C | -3.351014591 | -2.233511787 | 1.879896953  |
| C | -2.829329011 | -0.953234549 | 2.103487812  |
| C | -2.374695872 | -0.152471649 | 1.047018198  |
| C | -2.396359044 | -0.611771552 | -0.270020386 |
| C | -2.977341649 | -2.720600047 | -1.718180488 |
| C | -3.660936350 | -3.930761348 | -1.262676979 |
| H | -3.709081446 | -2.857906390 | 2.691574603  |
| H | -2.778164451 | -0.574637542 | 3.119319148  |
| H | -1.984378623 | 0.837366824  | 1.260130214  |
| H | -2.022360300 | 0.000290359  | -1.085640378 |
| N | -3.840548499 | -3.882603238 | 0.031126890  |
| H | -3.957562553 | -4.798891648 | -1.840216211 |
| H | -4.222909418 | -4.646908539 | 0.587083382  |
| C | -6.969860913 | -2.060891516 | -3.555105646 |
| C | -5.653817368 | -2.515087942 | -3.489698810 |
| C | -4.612282623 | -1.625821924 | -3.206406470 |
| C | -4.904643995 | -0.278231196 | -2.985687781 |
| C | -6.221711893 | 0.178708656  | -3.053556760 |
| C | -7.257099745 | -0.711637697 | -3.338057065 |
| H | -7.770790663 | -2.758785024 | -3.779855753 |
| H | -5.430818732 | -3.564473893 | -3.673098648 |
| H | -4.096217777 | 0.417332504  | -2.772293797 |
| H | -6.436194841 | 1.230217065  | -2.888022536 |
| H | -8.281423346 | -0.356401749 | -3.394198075 |

---

|   |              |              |              |
|---|--------------|--------------|--------------|
| C | -3.170668219 | -2.124818189 | -3.105451372 |
| H | -2.517232223 | -1.243395446 | -3.146613294 |
| H | -1.737499337 | -3.206845851 | -1.719799342 |
| C | 0.631993972  | -1.627259623 | 1.201186791  |
| C | 0.102654029  | -2.749459199 | 1.850767453  |
| C | 0.069744699  | -2.840634381 | 3.233268564  |
| C | 0.585881369  | -1.759903225 | 3.954340606  |
| C | 1.112629806  | -0.637882305 | 3.304274443  |
| C | 1.144655224  | -0.553598515 | 1.908402684  |
| C | 0.473273658  | -1.790560171 | -0.259981817 |
| H | -0.349089960 | -3.709924730 | 3.729745712  |
| H | 0.574346091  | -1.787771051 | 5.038830588  |
| H | 1.499510035  | 0.184975862  | 3.896348683  |
| H | 1.543201027  | 0.317757018  | 1.399128582  |
| N | -0.135036932 | -3.073286139 | -0.411123967 |
| O | -0.534410537 | -3.549408519 | -1.547653601 |
| O | 0.755328919  | -1.076370902 | -1.189427843 |
| O | -0.961730169 | -4.766926632 | 0.940576245  |
| C | -0.409586191 | -3.698566143 | 0.842006211  |
| C | -2.964156087 | -2.750401446 | -5.626962088 |
| C | -2.503394856 | -3.874898018 | -6.354090688 |
| C | -2.512946226 | -3.916701466 | -7.753921024 |
| C | -2.995474177 | -2.800697558 | -8.420621221 |
| C | -3.458102212 | -1.666891162 | -7.716359971 |
| C | -3.447993329 | -1.630984711 | -6.330084098 |
| C | -2.804354836 | -3.058170861 | -4.227588191 |
| C | -2.267341406 | -4.320583392 | -4.170595153 |
| H | -2.155472363 | -4.790134090 | -8.290803585 |
| H | -3.017503410 | -2.797378980 | -9.506101615 |
| H | -3.826190131 | -0.810818080 | -8.273509739 |

---

|   |              |              |              |
|---|--------------|--------------|--------------|
| H | -3.804242679 | -0.753242158 | -5.796698126 |
| N | -2.086287149 | -4.812895658 | -5.441411516 |
| H | -1.983903750 | -4.928039076 | -3.321003081 |
| H | -1.704906632 | -5.722886050 | -5.661564270 |

Structure: **16c**

Charge = 0 Multiplicity = 1

Number of imaginary frequencies: 0

SCF Energy: -996.457518476 hartree

SCF Energy + ZPVE: -996.105254476 hartree

Free Energy: -996.155064 hartree

|   |              |              |              |
|---|--------------|--------------|--------------|
| C | -0.281390000 | 0.187094000  | -3.425693000 |
| C | -0.373144000 | 1.521153000  | -2.954703000 |
| C | 0.486827000  | 2.533566000  | -3.399141000 |
| C | 1.455242000  | 2.184649000  | -4.328597000 |
| C | 1.568632000  | 0.860889000  | -4.809223000 |
| C | 0.713400000  | -0.137930000 | -4.367465000 |
| C | -1.311757000 | -0.568117000 | -2.759721000 |
| C | -1.964730000 | 0.314547000  | -1.937508000 |
| H | 0.396516000  | 3.548962000  | -3.025183000 |
| H | 2.141034000  | 2.942734000  | -4.694600000 |
| H | 2.341197000  | 0.626405000  | -5.535257000 |
| H | 0.808862000  | -1.154475000 | -4.741063000 |
| N | -1.403977000 | 1.567825000  | -2.048417000 |
| H | -2.790235000 | 0.148002000  | -1.258623000 |
| H | -1.714074000 | 2.391547000  | -1.551511000 |
| C | -5.153753000 | -2.708793000 | -1.832329000 |
| C | -4.031971000 | -2.392194000 | -2.598273000 |
| C | -2.745018000 | -2.479149000 | -2.056904000 |
| C | -2.602106000 | -2.892858000 | -0.728887000 |

---

|   |              |              |              |
|---|--------------|--------------|--------------|
| C | -3.722302000 | -3.209440000 | 0.041391000  |
| C | -5.001829000 | -3.117493000 | -0.506714000 |
| H | -6.144760000 | -2.636570000 | -2.270815000 |
| H | -4.153401000 | -2.069644000 | -3.630227000 |
| H | -1.610674000 | -2.971956000 | -0.290841000 |
| H | -3.593149000 | -3.530916000 | 1.070766000  |
| H | -5.872499000 | -3.367149000 | 0.091991000  |
| C | -1.552791000 | -2.054486000 | -2.904439000 |
| H | -1.821237000 | -2.253545000 | -3.951411000 |
| C | 0.709170000  | -2.603882000 | -1.613312000 |
| C | 1.715570000  | -3.588290000 | -1.790474000 |
| C | 2.847406000  | -3.664896000 | -0.968243000 |
| C | 2.964687000  | -2.727351000 | 0.046246000  |
| C | 1.979346000  | -1.733498000 | 0.240829000  |
| C | 0.859423000  | -1.663449000 | -0.573605000 |
| C | -0.288771000 | -2.836345000 | -2.629385000 |
| C | 0.151916000  | -3.911161000 | -3.358866000 |
| H | 3.600927000  | -4.430874000 | -1.124544000 |
| H | 3.830029000  | -2.755452000 | 0.701366000  |
| H | 2.104871000  | -1.013360000 | 1.043622000  |
| H | 0.106322000  | -0.896719000 | -0.412131000 |
| N | 1.348348000  | -4.369349000 | -2.858641000 |
| H | -0.300840000 | -4.388032000 | -4.218153000 |
| H | 1.875640000  | -5.150343000 | -3.224453000 |

Structure: **VII**

Charge = 0 Multiplicity = 1

Number of imaginary frequencies: 0

SCF Energy: -709.156189624 hartree

SCF Energy + ZPVE: -708.910493624 hartree

Free Energy: -708.952089 hartree

---

|   |              |              |              |
|---|--------------|--------------|--------------|
| C | -3.007566332 | 0.752144847  | -0.849295118 |
| C | -3.303545400 | 0.433744697  | 0.499024278  |
| C | -3.752046905 | 1.393851604  | 1.414371648  |
| C | -3.900716963 | 2.693061988  | 0.952343832  |
| C | -3.612550598 | 3.033981388  | -0.388243171 |
| C | -3.168584111 | 2.078820977  | -1.290218139 |
| C | -2.583527797 | -0.470618879 | -1.485673342 |
| C | -2.642171956 | -1.448324571 | -0.523023570 |
| H | -3.974333503 | 1.127360496  | 2.443195614  |
| H | -4.246903268 | 3.464092162  | 1.633821159  |
| H | -3.741560476 | 4.061604626  | -0.713767642 |
| H | -2.945620138 | 2.347672184  | -2.320106187 |
| N | -3.071712480 | -0.911407522 | 0.665191616  |
| H | -2.419977035 | -2.504592016 | -0.592937241 |
| H | -3.208428765 | -1.429718975 | 1.522500654  |
| C | -3.082321280 | -4.011521634 | -4.313919399 |
| C | -3.132169746 | -2.661321013 | -3.968413092 |
| C | -2.042068881 | -2.048759681 | -3.345198503 |
| C | -0.895146554 | -2.801468102 | -3.077640044 |
| C | -0.842200372 | -4.151336767 | -3.427254394 |
| C | -1.935922758 | -4.760129492 | -4.043950372 |
| H | -3.934813488 | -4.476933695 | -4.799388089 |
| H | -4.023452746 | -2.076252411 | -4.182830034 |
| H | -0.043837851 | -2.331936979 | -2.593532174 |
| H | 0.053141069  | -4.727690316 | -3.214208788 |
| H | -1.894632114 | -5.810561446 | -4.315595339 |
| C | -2.139380629 | -0.602673700 | -2.916238600 |
| H | -2.874873592 | -0.098802618 | -3.558382688 |
| O | -0.858286019 | 0.011972676  | -3.125700114 |
| H | -0.899801313 | 0.920328173  | -2.795359761 |

---

Structure: **TS8**

Charge = 0 Multiplicity = 1

Number of imaginary frequencies: 1

SCF Energy: -709.086781663 hartree

SCF Energy + ZPVE: -708.845287663 hartree

Free Energy: -708.886848 hartree

|   |              |              |              |
|---|--------------|--------------|--------------|
| C | -3.067101709 | 1.049110479  | -0.245326399 |
| C | -3.097852842 | 0.790133653  | 1.133033343  |
| C | -2.431483801 | 1.570420014  | 2.071333282  |
| C | -1.706098937 | 2.650080300  | 1.576057219  |
| C | -1.652637268 | 2.924410203  | 0.198226799  |
| C | -2.323430129 | 2.128731798  | -0.726168087 |
| C | -3.859766574 | 0.007070984  | -0.887294597 |
| C | -4.337089510 | -0.816658930 | 0.168246235  |
| H | -2.474139272 | 1.343912659  | 3.131465092  |
| H | -1.167147353 | 3.290151796  | 2.267036929  |
| H | -1.073038496 | 3.773899055  | -0.148728189 |
| H | -2.272968461 | 2.341745472  | -1.789810664 |
| N | -3.894977870 | -0.347938338 | 1.325554832  |
| H | -5.007702597 | -1.664986239 | 0.135616072  |
| H | -4.128805895 | -0.743576499 | 2.232018720  |
| C | -6.329558800 | -1.893187044 | -4.665024179 |
| C | -5.607395971 | -0.891951280 | -4.025042808 |
| C | -4.834994497 | -1.191639244 | -2.889600317 |
| C | -4.744901732 | -2.522896008 | -2.444804847 |
| C | -5.454012865 | -3.522464526 | -3.100374389 |
| C | -6.255795519 | -3.207883906 | -4.200809232 |
| H | -6.937984520 | -1.652513036 | -5.530619005 |
| H | -5.647456033 | 0.132194894  | -4.385357729 |

---

|   |              |              |              |
|---|--------------|--------------|--------------|
| H | -4.084341071 | -2.777977166 | -1.621480861 |
| H | -5.372492167 | -4.550667144 | -2.763113848 |
| H | -6.806180287 | -3.993536643 | -4.709125437 |
| C | -4.131046108 | -0.101966477 | -2.236872733 |
| H | -3.921192250 | 0.768533154  | -2.851617114 |
| O | -1.846586143 | -0.639067739 | -3.226700503 |
| H | -2.257543324 | -1.469472242 | -3.496338584 |

Structure: **9**

Charge = 0 Multiplicity = 1

Number of imaginary frequencies: 0

SCF Energy: -709.135593962 hartree

SCF Energy + ZPVE: -708.893744962 hartree

Free Energy: -708.937313 hartree

|   |              |              |              |
|---|--------------|--------------|--------------|
| C | -3.301535897 | 0.690401023  | -0.478322849 |
| C | -3.389288544 | 0.194141118  | 0.833109250  |
| C | -2.749732899 | 0.815576614  | 1.897965390  |
| C | -2.006234380 | 1.966055507  | 1.620705157  |
| C | -1.912700913 | 2.468368157  | 0.316292321  |
| C | -2.556867960 | 1.833926495  | -0.749905880 |
| C | -4.085701266 | -0.237820924 | -1.302718227 |
| C | -4.590430976 | -1.215766145 | -0.326242583 |
| H | -2.827183845 | 0.418375191  | 2.906056787  |
| H | -1.492514113 | 2.478597631  | 2.428015613  |
| H | -1.329237065 | 3.364604498  | 0.129815674  |
| H | -2.475441858 | 2.227150193  | -1.759475007 |
| N | -4.201834249 | -0.967521563 | 0.886567334  |
| H | -5.261719398 | -2.040008204 | -0.539819988 |
| H | -4.552659821 | -1.658166303 | 2.559279807  |
| C | -6.439215661 | -1.446066056 | -5.438771797 |

---

|   |              |              |              |
|---|--------------|--------------|--------------|
| C | -5.722671581 | -0.592205758 | -4.606073277 |
| C | -5.042614770 | -1.093337641 | -3.483485133 |
| C | -5.048952460 | -2.478150137 | -3.246235585 |
| C | -5.756967701 | -3.330831313 | -4.087929676 |
| C | -6.461885057 | -2.817354109 | -5.178232055 |
| H | -6.971989277 | -1.044440646 | -6.295047985 |
| H | -5.695151799 | 0.474794600  | -4.810280259 |
| H | -4.466643554 | -2.892548468 | -2.429580077 |
| H | -5.747745004 | -4.399911941 | -3.900327658 |
| H | -7.013394263 | -3.485829248 | -5.832218546 |
| C | -4.324968319 | -0.144531416 | -2.631368341 |
| H | -3.961215247 | 0.751881479  | -3.135553565 |
| O | -4.720249675 | -2.030148720 | 3.454870532  |
| H | -4.452289159 | -1.337540535 | 4.071642034  |

Structure: **TS9**

Charge = 0 Multiplicity = 1

Number of imaginary frequencies: 1

SCF Energy: -709.111209386 hartree

SCF Energy + ZPVE: -708.873661386 hartree

Free Energy: -708.916374 hartree

Structure: **VIII**

Charge = 0 Multiplicity = 1

Number of imaginary frequencies: 0

SCF Energy: -632.720370996 hartree

SCF Energy + ZPVE: -632.502722996 hartree

Free Energy: -632.541487 hartree

|   |              |             |              |
|---|--------------|-------------|--------------|
| C | -3.229231233 | 0.820500332 | -0.419666417 |
| C | -3.341631022 | 0.419626183 | 0.922998400  |



---

|   |              |              |              |
|---|--------------|--------------|--------------|
| C | -2.678938790 | 1.093073459  | 1.940955239  |
| C | -1.888953668 | 2.190908028  | 1.586724782  |
| C | -1.772359382 | 2.595708326  | 0.251143397  |
| C | -2.439746299 | 1.911308590  | -0.769222253 |
| C | -4.044317874 | -0.134109385 | -1.181680379 |
| C | -4.587729374 | -1.018818474 | -0.136403405 |
| H | -2.772059702 | 0.773656146  | 2.974657940  |
| H | -1.357772585 | 2.738256290  | 2.359327382  |
| H | -1.154266383 | 3.453212787  | 0.004113969  |
| H | -2.343247096 | 2.227801937  | -1.804333504 |
| N | -4.198612366 | -0.704582607 | 1.060070462  |
| H | -5.288232755 | -1.829860020 | -0.300431453 |
| C | -6.434903186 | -1.568959918 | -5.219673638 |
| C | -5.694025040 | -0.677140094 | -4.450294659 |
| C | -5.021335907 | -1.115475745 | -3.297476813 |
| C | -5.061723033 | -2.479777021 | -2.964010916 |
| C | -5.794096512 | -3.371510958 | -3.742620676 |
| C | -6.490166745 | -2.917871012 | -4.864627587 |
| H | -6.961946956 | -1.215296764 | -6.100387295 |
| H | -5.641457651 | 0.372077449  | -4.728455560 |
| H | -4.487619445 | -2.848611807 | -2.119809305 |
| H | -5.810261523 | -4.424983734 | -3.481306066 |
| H | -7.060018046 | -3.616046462 | -5.470005253 |
| C | -4.272912490 | -0.129726559 | -2.514466881 |
| H | -3.874356936 | 0.712227034  | -3.082278511 |

Structure: **1'**

Charge = -1 Multiplicity = 1

Number of imaginary frequencies: 0

SCF Energy: -363.204076725 hartree

---

SCF Energy + ZPVE: -363.086868725 hartree

Free Energy: -363.116922 hartree

|   |              |              |              |
|---|--------------|--------------|--------------|
| C | -2.284875488 | 0.234198105  | -0.000000004 |
| C | -3.724259161 | 0.206860952  | 0.000000004  |
| C | -4.455784783 | 1.412794762  | 0.000000003  |
| C | -3.769027829 | 2.618250095  | 0.000000003  |
| C | -2.352218861 | 2.649868946  | -0.000000001 |
| C | -1.612362858 | 1.475766193  | -0.000000009 |
| C | -1.889401975 | -1.135694717 | 0.000000009  |
| C | -3.085641794 | -1.855911490 | -0.000000007 |
| H | -5.544215228 | 1.391378469  | 0.000000004  |
| H | -4.322065465 | 3.554039448  | 0.000000005  |
| H | -1.841516535 | 3.609511332  | -0.000000002 |
| H | -0.524502179 | 1.515552855  | -0.000000008 |
| H | -0.882772444 | -1.536090985 | 0.000000019  |
| N | -4.200198084 | -1.075491763 | -0.000000009 |
| H | -3.183190316 | -2.938759202 | -0.000000007 |

Structure: **5e**

Charge = 0 Multiplicity = 1

Number of imaginary frequencies: 0

SCF Energy: -345.449059260 hartree

SCF Energy + ZPVE: -345.338139260 hartree

Free Energy: -345.368809 hartree

|   |              |             |              |
|---|--------------|-------------|--------------|
| C | -3.710845826 | 0.150117414 | -0.317448624 |
| C | -2.324096744 | 0.186030597 | -0.179091689 |
| C | -1.666587223 | 1.414036777 | -0.061400100 |
| C | -2.394416724 | 2.610880578 | -0.076725652 |
| C | -3.777647547 | 2.572596543 | -0.212028544 |
| C | -4.434264634 | 1.342944670 | -0.333454094 |

---

|   |              |              |              |
|---|--------------|--------------|--------------|
| H | -4.224757520 | -0.801242540 | -0.413640319 |
| H | -1.745606025 | -0.734922371 | -0.164525807 |
| H | -1.868371427 | 3.556594027  | 0.018278837  |
| H | -4.349167258 | 3.495575257  | -0.223579397 |
| H | -5.514729132 | 1.317735832  | -0.441443537 |
| C | -0.193353304 | 1.421030747  | 0.075035737  |
| H | 0.282592020  | 0.422764447  | 0.103689029  |
| O | 0.483008344  | 2.429548022  | 0.149827159  |

Structure: **TS1'**

Charge = -1 Multiplicity = 1

Number of imaginary frequencies: 1

SCF Energy: -708.632865135 hartree

SCF Energy + ZPVE: -708.403428135 hartree

Free Energy: -708.444278 hartree

|   |              |              |              |
|---|--------------|--------------|--------------|
| C | -2.391459736 | 0.361710621  | -0.114255778 |
| C | -3.711185415 | 0.524250575  | 0.368747379  |
| C | -4.197406909 | 1.773043869  | 0.759447805  |
| C | -3.338744308 | 2.868704430  | 0.669600900  |
| C | -2.027089576 | 2.716964799  | 0.190244542  |
| C | -1.546129965 | 1.469057130  | -0.212690202 |
| C | -2.276883922 | -1.042882946 | -0.513402494 |
| C | -3.536543464 | -1.595022638 | -0.030266739 |
| H | -5.214220796 | 1.881897178  | 1.128252716  |
| H | -3.685828050 | 3.851245068  | 0.976710927  |
| H | -1.378448899 | 3.586860763  | 0.132619800  |
| H | -0.534283754 | 1.361450082  | -0.591379472 |
| H | -1.350829971 | -1.601232288 | -0.397681640 |
| N | -4.394923236 | -0.704278298 | 0.403243244  |
| H | -3.817687089 | -2.643724293 | -0.090272118 |

---

|   |              |              |              |
|---|--------------|--------------|--------------|
| C | -3.849007842 | -4.398963569 | -3.255907157 |
| C | -3.724705121 | -3.050160728 | -2.919574968 |
| C | -2.465090122 | -2.475934050 | -2.724333993 |
| C | -1.327731453 | -3.272214422 | -2.884155613 |
| C | -1.445911448 | -4.622810333 | -3.212776896 |
| C | -2.708382230 | -5.191292682 | -3.399598624 |
| H | -4.834168630 | -4.831356860 | -3.408491632 |
| H | -4.615569912 | -2.434271279 | -2.803990684 |
| H | -0.350367064 | -2.814449096 | -2.753829022 |
| H | -0.553620181 | -5.232489528 | -3.328687985 |
| H | -2.801613020 | -6.241542449 | -3.660928336 |
| C | -2.319485980 | -1.001815589 | -2.369539508 |
| H | -3.306184863 | -0.493865063 | -2.475768439 |
| O | -1.277799781 | -0.391177206 | -2.804514952 |

Structure: **2'**

Charge = -1 Multiplicity = 1

Number of imaginary frequencies: 0

SCF Energy: -708.634619025 hartree

SCF Energy + ZPVE: -708.403902025 hartree

Free Energy: -708.444653 hartree

|   |              |              |              |
|---|--------------|--------------|--------------|
| C | -2.477263451 | 0.483042331  | -0.099067801 |
| C | -3.726695153 | 0.634299412  | 0.528951204  |
| C | -4.170590157 | 1.865299220  | 1.003013019  |
| C | -3.326525420 | 2.966622773  | 0.840405898  |
| C | -2.080957574 | 2.828716014  | 0.214688609  |
| C | -1.646295253 | 1.586681207  | -0.263825644 |
| C | -2.374027539 | -0.945342687 | -0.521611766 |
| C | -3.646274873 | -1.480613209 | 0.054557724  |
| H | -5.139539550 | 1.961122936  | 1.485389235  |

---

|   |              |              |              |
|---|--------------|--------------|--------------|
| H | -3.639808688 | 3.941496453  | 1.202894497  |
| H | -1.443323878 | 3.700883832  | 0.099329057  |
| H | -0.687275588 | 1.479976295  | -0.760100061 |
| H | -1.486642308 | -1.476416850 | -0.157765504 |
| N | -4.419975714 | -0.601590164 | 0.605106128  |
| H | -3.948845646 | -2.523981832 | -0.001615742 |
| C | -3.835195484 | -4.456629678 | -3.056681784 |
| C | -3.691840230 | -3.100146683 | -2.757541851 |
| C | -2.434943637 | -2.552446490 | -2.481516694 |
| C | -1.317699861 | -3.392247551 | -2.524061458 |
| C | -1.452916910 | -4.750413880 | -2.815129976 |
| C | -2.714067120 | -5.288541347 | -3.082500165 |
| H | -4.819484108 | -4.863229101 | -3.274185131 |
| H | -4.569584253 | -2.455094612 | -2.739520718 |
| H | -0.339490015 | -2.955469721 | -2.339334191 |
| H | -0.574358203 | -5.389920238 | -2.840506665 |
| H | -2.821164716 | -6.343908000 | -3.316909857 |
| C | -2.256477335 | -1.063729983 | -2.140878443 |
| H | -3.190092609 | -0.555837079 | -2.498465813 |
| O | -1.121241859 | -0.522942200 | -2.571697686 |

Structure: **TS2'**

Charge = -1 Multiplicity = 1

Number of imaginary frequencies: 1

SCF Energy: -708.597224393 hartree

SCF Energy + ZPVE: -708.371096393 hartree

Free Energy: -708.412589 hartree

|   |              |             |              |
|---|--------------|-------------|--------------|
| C | -2.622413448 | 0.592690858 | -0.367364732 |
| C | -3.473415007 | 0.505862109 | 0.758067123  |
| C | -4.045418846 | 1.647506116 | 1.324730684  |

---

|   |              |              |              |
|---|--------------|--------------|--------------|
| C | -3.772494190 | 2.880438203  | 0.733847564  |
| C | -2.939534105 | 2.971518271  | -0.394388758 |
| C | -2.353639084 | 1.833440123  | -0.949877123 |
| C | -2.163149037 | -0.777240034 | -0.627636453 |
| C | -2.930524632 | -1.550347863 | 0.342446092  |
| H | -4.688841610 | 1.571344231  | 2.197616233  |
| H | -4.209401095 | 3.784376085  | 1.148669144  |
| H | -2.749580970 | 3.944597551  | -0.838823894 |
| H | -1.702723489 | 1.913522221  | -1.817613877 |
| H | -0.925856154 | -0.906794544 | -0.422046680 |
| N | -3.637176039 | -0.826631993 | 1.174183230  |
| H | -2.894227498 | -2.633464127 | 0.439885833  |
| C | -4.012914312 | -3.896873858 | -3.281662499 |
| C | -3.469917104 | -2.682096594 | -2.869815910 |
| C | -2.149218900 | -2.607149487 | -2.406865128 |
| C | -1.382868431 | -3.772094717 | -2.368280086 |
| C | -1.923396815 | -4.994379535 | -2.780492066 |
| C | -3.238367105 | -5.061360639 | -3.237823806 |
| H | -5.038730581 | -3.939698805 | -3.637662888 |
| H | -4.075756708 | -1.777563822 | -2.903217824 |
| H | -0.359005832 | -3.696350772 | -2.014351113 |
| H | -1.314780361 | -5.894225935 | -2.747266224 |
| H | -3.658903396 | -6.009189796 | -3.561683755 |
| C | -1.560084040 | -1.277475259 | -1.952392490 |
| H | -1.793410123 | -0.536878388 | -2.743447075 |
| O | -0.197500578 | -1.321412500 | -1.629586271 |

Structure: **3'**

Charge = -1 Multiplicity = 1

Number of imaginary frequencies: 0

---

SCF Energy: -708.674654758 hartree

SCF Energy + ZPVE: -708.442858758 hartree

Free Energy: -708.484320 hartree

|   |              |              |              |
|---|--------------|--------------|--------------|
| C | -2.237879505 | 0.410385114  | 0.091052015  |
| C | -3.640068735 | 0.285655779  | 0.375954362  |
| C | -4.510886859 | 1.365285160  | 0.124263077  |
| C | -3.990634615 | 2.540074226  | -0.400611096 |
| C | -2.608309794 | 2.665303614  | -0.682785285 |
| C | -1.732914475 | 1.615496387  | -0.440055882 |
| C | -1.668269474 | -0.849013722 | 0.454436365  |
| C | -2.751473260 | -1.607622230 | 0.915202176  |
| H | -5.573637542 | 1.272672567  | 0.340220348  |
| H | -4.651333743 | 3.379962237  | -0.599739530 |
| H | -2.231410454 | 3.598831872  | -1.092487082 |
| H | -0.671578238 | 1.725106211  | -0.655574097 |
| N | -3.939874994 | -0.952920745 | 0.878529518  |
| H | -2.705861920 | -2.634679618 | 1.270085476  |
| C | -0.044593104 | -4.956550348 | -0.359606961 |
| C | -0.174371990 | -3.577960559 | -0.518575966 |
| C | -0.010202121 | -2.714324365 | 0.569656940  |
| C | 0.298158884  | -3.253670929 | 1.819863053  |
| C | 0.428563104  | -4.634961223 | 1.983637026  |
| C | 0.256004247  | -5.490290940 | 0.895955416  |
| H | -0.173885704 | -5.614872883 | -1.214090841 |
| H | -0.410726841 | -3.162630362 | -1.496550094 |
| H | 0.442306990  | -2.591768593 | 2.669323402  |
| H | 0.667136284  | -5.041205522 | 2.962753401  |
| H | 0.359806024  | -6.564032444 | 1.022830332  |
| C | -0.217573668 | -1.220648707 | 0.379524877  |
| H | 0.181191910  | -0.951772969 | -0.608644194 |

---

|   |             |              |             |
|---|-------------|--------------|-------------|
| O | 0.574859464 | -0.461571954 | 1.304277699 |
| H | 0.014673931 | -0.256351136 | 2.064997038 |

Structure: **TS3'**

Charge = -1 Multiplicity = 1

Number of imaginary frequencies: 1

SCF Energy: -708.642851279 hartree

SCF Energy + ZPVE: -708.415154279 hartree

Free Energy: -708.423642 hartree

|   |              |              |              |
|---|--------------|--------------|--------------|
| C | -2.447285839 | 0.421704577  | 0.047528756  |
| C | -3.692543294 | 0.556901623  | 0.696832059  |
| C | -4.462084043 | 1.710091406  | 0.557522979  |
| C | -3.959748323 | 2.736442277  | -0.244279464 |
| C | -2.718046439 | 2.610273370  | -0.887104590 |
| C | -1.948087343 | 1.454454373  | -0.745546555 |
| C | -1.946668087 | -0.895054608 | 0.434113091  |
| C | -3.000929655 | -1.414200586 | 1.301395858  |
| H | -5.421146987 | 1.803285627  | 1.060005638  |
| H | -4.535136967 | 3.648864228  | -0.372112734 |
| H | -2.351776955 | 3.426776036  | -1.502714753 |
| H | -0.985202899 | 1.365503262  | -1.242405700 |
| N | -4.006562614 | -0.594930822 | 1.447048241  |
| H | -3.014864282 | -2.397422838 | 1.761331672  |
| C | 0.817041686  | -4.855365792 | -0.309191080 |
| C | 0.352447638  | -3.575402954 | -0.601348370 |
| C | -0.301906672 | -2.810576199 | 0.376172848  |
| C | -0.445518558 | -3.340876906 | 1.667796241  |
| C | 0.029745078  | -4.616397962 | 1.961955026  |
| C | 0.654787799  | -5.380543263 | 0.973951213  |
| H | 1.314125775  | -5.438166572 | -1.079034632 |



---

|   |              |              |              |
|---|--------------|--------------|--------------|
| H | 0.490178274  | -3.158922226 | -1.596048071 |
| H | -0.892670290 | -2.736454994 | 2.451354718  |
| H | -0.077308714 | -5.011788308 | 2.967746198  |
| H | 1.025249146  | -6.374342967 | 1.207648067  |
| C | -0.788957168 | -1.475840595 | 0.007075299  |
| H | -0.231124703 | -0.978153945 | -0.778143316 |
| O | 1.293933493  | -0.339186896 | 0.954853862  |
| H | 1.603928162  | -1.134662166 | 1.405714562  |

Structure: OH-

Charge = -1 Multiplicity = 1

Number of imaginary frequencies: 0

SCF Energy: -75.877728569 hartree

SCF Energy + ZPVE: -75.868897569 hartree

Free Energy: -75.885150 hartree

|   |              |             |             |
|---|--------------|-------------|-------------|
| O | -4.413899965 | 1.430917000 | 0.000000000 |
| H | -5.378774035 | 1.430917000 | 0.000000000 |

Structure: 4'

Charge = 0 Multiplicity = 1

Number of imaginary frequencies: 0

SCF Energy: -632.730056975 hartree

SCF Energy + ZPVE: -632.512742975 hartree

Free Energy: -632.551789 hartree

|   |              |             |              |
|---|--------------|-------------|--------------|
| C | -2.459593199 | 0.424563458 | 0.025920139  |
| C | -3.694689144 | 0.582765582 | 0.680566672  |
| C | -4.434105344 | 1.753817172 | 0.567518167  |
| C | -3.906988603 | 2.779386102 | -0.223157151 |
| C | -2.676992808 | 2.628910153 | -0.876601928 |
| C | -1.937182671 | 1.448709636 | -0.756820306 |

---

|   |              |              |              |
|---|--------------|--------------|--------------|
| C | -1.990536943 | -0.918058598 | 0.393860284  |
| C | -3.075477060 | -1.426611019 | 1.256337210  |
| H | -5.387411825 | 1.863749907  | 1.076504808  |
| H | -4.458241402 | 3.708626161  | -0.332821068 |
| H | -2.292736153 | 3.442230540  | -1.484919299 |
| H | -0.981806574 | 1.339423531  | -1.263391629 |
| N | -4.044296064 | -0.580566445 | 1.413042050  |
| H | -3.120998112 | -2.419341691 | 1.691886790  |
| C | 0.918677878  | -4.818846099 | -0.275407310 |
| C | 0.412064555  | -3.560495223 | -0.585275247 |
| C | -0.340173917 | -2.839066547 | 0.357100175  |
| C | -0.527956593 | -3.385244714 | 1.638147319  |
| C | -0.009050929 | -4.639034533 | 1.949171353  |
| C | 0.705590157  | -5.362983289 | 0.992559561  |
| H | 1.485897353  | -5.370934078 | -1.018638613 |
| H | 0.583763992  | -3.129525232 | -1.568333269 |
| H | -1.045551181 | -2.813156283 | 2.401827857  |
| H | -0.151538367 | -5.047977531 | 2.944863383  |
| H | 1.108967653  | -6.340303959 | 1.240566634  |
| C | -0.862758585 | -1.528011947 | -0.035493808 |
| H | -0.272542110 | -0.998024055 | -0.784470775 |

Structure: **TS4'**

Charge = -1 Multiplicity = 1

Number of imaginary frequencies: 1

SCF Energy: -995.932564555 hartree

SCF Energy + ZPVE: -995.596976555 hartree

Free Energy: -995.641767 hartree

|   |              |             |              |
|---|--------------|-------------|--------------|
| C | -2.815502384 | 0.607300576 | -0.030228461 |
| C | -3.918668418 | 0.608298344 | 0.865863177  |

---

|   |              |              |              |
|---|--------------|--------------|--------------|
| C | -4.981854031 | 1.502844926  | 0.692772977  |
| C | -4.931944285 | 2.390930360  | -0.378804911 |
| C | -3.840495827 | 2.392120712  | -1.270124343 |
| C | -2.778667385 | 1.506814405  | -1.104910149 |
| C | -1.922478270 | -0.418838360 | 0.455653176  |
| C | -2.593367522 | -0.936374637 | 1.609905978  |
| H | -5.823439941 | 1.500873031  | 1.381295968  |
| H | -5.744559618 | 3.095555504  | -0.531670192 |
| H | -3.830011023 | 3.095265549  | -2.098376362 |
| H | -1.941594801 | 1.515349560  | -1.800315574 |
| N | -3.762129242 | -0.356292673 | 1.855428531  |
| H | -2.251214842 | -1.752811580 | 2.237742732  |
| C | 1.685395045  | -3.638386717 | -0.525695268 |
| C | 0.830666310  | -2.577944202 | -0.806222269 |
| C | 0.158093796  | -1.897560583 | 0.225066375  |
| C | 0.376268730  | -2.304983067 | 1.549829181  |
| C | 1.230131025  | -3.370330757 | 1.831407376  |
| C | 1.889517336  | -4.036989473 | 0.798014536  |
| H | 2.197943052  | -4.148746783 | -1.336027816 |
| H | 0.676857917  | -2.262097642 | -1.834840785 |
| H | -0.087915221 | -1.762468730 | 2.366425044  |
| H | 1.395688485  | -3.666871193 | 2.863139513  |
| H | 2.562993479  | -4.859111873 | 1.022522112  |
| C | -0.689828719 | -0.754254030 | -0.137243632 |
| H | -0.592358709 | -0.464401835 | -1.182872231 |
| C | 1.954771172  | 0.452791427  | -0.383139615 |
| C | 2.727371453  | -0.030546562 | 0.713034226  |
| C | 3.932597745  | -0.708449523 | 0.499944089  |
| C | 4.371907149  | -0.884884794 | -0.810856639 |
| C | 3.621084157  | -0.395447592 | -1.897507357 |

---

|   |             |              |              |
|---|-------------|--------------|--------------|
| C | 2.412563147 | 0.269201965  | -1.694905994 |
| C | 0.742079752 | 0.960363748  | 0.204848493  |
| C | 0.962319433 | 0.835724824  | 1.608156507  |
| H | 4.507380298 | -1.089255704 | 1.341349650  |
| H | 5.306508389 | -1.405813736 | -0.999974444 |
| H | 3.990299779 | -0.542919794 | -2.908900038 |
| H | 1.833124514 | 0.626522978  | -2.543755319 |
| N | 2.101125099 | 0.232303034  | 1.927418347  |
| H | 0.260374031 | 1.136560610  | 2.382423250  |
| H | 0.029163648 | 1.631637885  | -0.258294339 |

Structure: **5'**

Charge = -1 Multiplicity = 1

Number of imaginary frequencies: 0

SCF Energy: -995.962025885 hartree

SCF Energy + ZPVE: -995.623651885 hartree

Free Energy: -995.672753 hartree

|   |              |              |              |
|---|--------------|--------------|--------------|
| C | -2.704699622 | 0.582360770  | -0.021603737 |
| C | -3.883504955 | 0.505084453  | 0.798163836  |
| C | -4.918328474 | 1.449605363  | 0.635431137  |
| C | -4.781792509 | 2.440227255  | -0.327290942 |
| C | -3.628203892 | 2.509306616  | -1.146700121 |
| C | -2.595700142 | 1.593005414  | -1.001049484 |
| C | -1.874727496 | -0.501383262 | 0.398934320  |
| C | -2.610877882 | -1.131802084 | 1.407370053  |
| H | -5.810110498 | 1.397346505  | 1.257340065  |
| H | -5.572497714 | 3.174015096  | -0.460712008 |
| H | -3.553699927 | 3.291484780  | -1.897698986 |
| H | -1.718302633 | 1.655815709  | -1.643313667 |
| N | -3.815335114 | -0.549286229 | 1.664700171  |

---

|   |              |              |              |
|---|--------------|--------------|--------------|
| H | -2.310321860 | -2.013242524 | 1.966909948  |
| C | 0.822315669  | -4.376053147 | -0.461468190 |
| C | 0.302372958  | -3.120829899 | -0.780938284 |
| C | 0.035658929  | -2.172723628 | 0.213795568  |
| C | 0.306416549  | -2.515754884 | 1.545655818  |
| C | 0.828184060  | -3.767885992 | 1.870051287  |
| C | 1.088761175  | -4.703611506 | 0.867484833  |
| H | 1.019596087  | -5.095018055 | -1.251616926 |
| H | 0.100230088  | -2.870694704 | -1.820149247 |
| H | 0.101382346  | -1.805804945 | 2.342364087  |
| H | 1.030331736  | -4.012695741 | 2.908972620  |
| H | 1.495098146  | -5.678467674 | 1.121148212  |
| C | -0.512608502 | -0.811771783 | -0.171217460 |
| H | -0.593867267 | -0.805831453 | -1.267383249 |
| C | 1.873763322  | 0.166547669  | -0.460308887 |
| C | 2.796355341  | 0.293642767  | 0.588178260  |
| C | 4.166808434  | 0.196387376  | 0.373857399  |
| C | 4.602408826  | -0.042684479 | -0.932801882 |
| C | 3.688213460  | -0.177860621 | -1.983705423 |
| C | 2.310504235  | -0.073687071 | -1.756259299 |
| C | 0.505891734  | 0.330868520  | 0.138027451  |
| C | 0.878728050  | 0.528869447  | 1.584985663  |
| H | 4.870395342  | 0.302089810  | 1.194584025  |
| H | 5.666090908  | -0.125317123 | -1.136171520 |
| H | 4.053628291  | -0.365253059 | -2.989141143 |
| H | 1.604497147  | -0.178768042 | -2.576368098 |
| N | 2.143353011  | 0.524437936  | 1.830935041  |
| H | 0.148365882  | 0.686137621  | 2.376085356  |
| H | 0.042399039  | 1.265599464  | -0.210657457 |

Structure: **TS11**

---

Charge = 1 Multiplicity = 1

Free Energy: -1583.906688 hartree

|   |             |             |             |
|---|-------------|-------------|-------------|
| C | -1.68040500 | 0.59856700  | -1.59876500 |
| C | -2.37208600 | 0.66719900  | -0.36317300 |
| C | -2.43990700 | 1.84796100  | 0.38690900  |
| C | -1.78521000 | 2.96356900  | -0.11611400 |
| C | -1.08409200 | 2.91569500  | -1.34208600 |
| C | -1.03132000 | 1.74724500  | -2.09127600 |
| C | -1.77722600 | -0.75654700 | -2.07034000 |
| C | -2.51430500 | -1.43525600 | -1.13319300 |
| H | -2.97538700 | 1.88292100  | 1.33072300  |
| H | -1.81030700 | 3.89269000  | 0.44465700  |
| H | -0.58424400 | 3.80958800  | -1.70213100 |
| H | -0.48775600 | 1.71271300  | -3.03318300 |
| N | -2.87796000 | -0.58376100 | -0.11106000 |
| H | -2.82664900 | -2.47047100 | -1.11163300 |
| H | -3.42916800 | -0.84403800 | 0.69525700  |
| C | -3.86590700 | -3.38481300 | -4.83293700 |
| C | -3.18632300 | -2.37167800 | -4.15926200 |
| C | -1.79504600 | -2.42178600 | -3.99022200 |
| C | -1.10344000 | -3.51334100 | -4.52500100 |
| C | -1.78172000 | -4.53231400 | -5.19877900 |
| C | -3.16530100 | -4.47500200 | -5.35347500 |
| H | -4.94367900 | -3.32282600 | -4.95188200 |
| H | -3.74312700 | -1.52854100 | -3.75901900 |
| H | -0.02471800 | -3.57104300 | -4.41490900 |
| H | -1.22286700 | -5.37189400 | -5.60168700 |
| H | -3.69311900 | -5.26795400 | -5.87441400 |
| C | -1.06550300 | -1.26752000 | -3.30105900 |
| H | -1.07050200 | -0.43319500 | -4.01868400 |

---

|   |             |             |             |
|---|-------------|-------------|-------------|
| C | 0.91783900  | -2.61427000 | -2.19951400 |
| C | 2.33675500  | -2.61748100 | -2.38621600 |
| C | 3.18885200  | -3.51097300 | -1.72482000 |
| C | 2.58662600  | -4.43379200 | -0.82042800 |
| C | 1.21005100  | -4.46156500 | -0.63643700 |
| C | 0.34206500  | -3.57621800 | -1.32183600 |
| C | 0.39416000  | -1.55214600 | -3.00687900 |
| C | 1.47251000  | -1.01655200 | -3.76331800 |
| H | 4.26083700  | -3.49249800 | -1.89364700 |
| H | 3.21647300  | -5.13675300 | -0.28226800 |
| H | 0.78199500  | -5.19331700 | 0.04502100  |
| H | -0.73282900 | -3.63624500 | -1.18840500 |
| H | 0.81020900  | -0.70408300 | -1.62825600 |
| N | 2.63254200  | -1.63803500 | -3.30280300 |
| H | 1.51888600  | -0.11108900 | -4.35214700 |
| H | 3.56916800  | -1.40934100 | -3.60563400 |
| O | 1.04881400  | -0.11506300 | -0.73395700 |
| H | 0.80543500  | 0.81948400  | -0.89265300 |
| H | 2.00663000  | -0.15451200 | -0.54993500 |

## 5 References

- (a) T. Benkovics; I. A. Guzei; T. P. Yoon, *Angew. Chem. Int. Ed.* **2010**, 49, 9153; (b) Bhattacharjee, P.; Boruah, P. K.; Das, M. R.; Bora, U., *New J. Chem.*, **2020**, 44, 7675.
- (a) Zheng, L.; Gao, F.; Yang, C.; Gao, G.; Zhao, Y.; Gao, Y.; Xia, W., *Org. Lett.* **2017**, 19, 5086; (b) Badigenchala, S.; Ganapathy, D.; Das, A.; Singh, R.; Sekar, G, *Synthesis*, **2014**, 46, 101; (c) Yadav, V.; Balaraman, E.; Mhaske, S. B., *Adv. Synth. Catal.* **2021**, 363, 4430; (d) Biswas, N.; Sharma, R.; Srimani, D., *Adv. Synth. Catal.* **2020**, 362, 2902; (e) Hikawa, H.; Yokoyama, Y., *RSC Adv.*, **2013**, 3, 1061; (f) Gopalaiah, K.; Chandrudu, S. N.; Devi, A., *Synthesis* **2015**; 47, 1766; (g) Kaswan, P.; Nandwana, N.K.; DeBoef, B.; Kumar, A., *Adv. Synth. Catal.*, **2016**, 358: 2108; (h) Dong, Y.; Lushnikova, T.; Golla, R.M.; Wang, X.; Wang, G., *Bioorgan. Med. Chem.*, **2017**, 25, 864; (i) Jin, J.; Li, Y.; Xiang, S.; Fan, W.; Guo, S.; Huang, D, *Org. Biomol. Chem.*, **2021**, 19, 4076; (j) Dipika; Sharma, Y. B.; Pant, S.; Dhaked, D. D.;

## 6 Detail descriptions for products

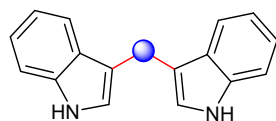

**di(1H-indol-3-yl)methane (1c).**<sup>2</sup> Yellow liquid was obtained by column chromatography (eluent: EtOAc/petroleum ether = 1/100) with 79% isolated yield (48.6 mg). <sup>1</sup>H NMR (500 MHz, DMSO-*d*<sub>6</sub>) δ 10.75 (s, 2H), 7.55 (d, *J* = 7.9 Hz, 2H), 7.35 (d, *J* = 8.1 Hz, 2H), 7.16 (d, *J* = 1.8 Hz, 2H), 7.06 (t, *J* = 7.5 Hz, 2H), 6.95 (t, *J* = 7.4 Hz, 1H), 4.16 (s, 2H). <sup>13</sup>C NMR (126 MHz, DMSO-*d*<sub>6</sub>) δ 136.8, 127.6, 123.2, 121.2, 119.1, 118.5, 114.7, 111.7, 21.4.

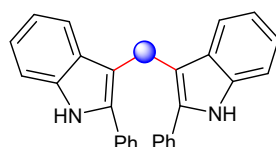

**bis(2-phenyl-1H-indol-3-yl)methane (2c).**<sup>2f</sup> Yellow oil was obtained by column chromatography (eluent: EtOAc/petroleum ether = 1/100) with 62% isolated yield (61.7 mg). <sup>1</sup>H NMR (500 MHz, DMSO-*d*<sub>6</sub>) δ 11.23 (s, 2H), 7.73 (d, *J* = 7.3 Hz, 4H), 7.49 (t, *J* = 7.7 Hz, 4H), 7.37 (t, *J* = 8.3 Hz, 4H), 7.07 (d, *J* = 8.0 Hz, 2H), 7.01 (t, *J* = 7.5 Hz, 2H), 6.74 (t, *J* = 7.5 Hz, 2H), 4.57 (s, 2H). <sup>13</sup>C NMR (126 MHz, DMSO-*d*<sub>6</sub>) δ 136.5, 134.8, 133.6, 129.2, 129.0, 128.6, 127.6, 121.6, 119.6, 118.8, 111.5, 111.3, 21.7.

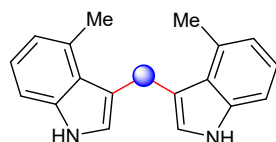

**bis(4-methyl-1H-indol-3-yl)methane (3c).**<sup>2</sup> White oil was obtained by column chromatography (eluent: EtOAc/petroleum ether = 1/100) with 70% isolated yield (47.9 mg). <sup>1</sup>H NMR (500 MHz, CDCl<sub>3</sub>) δ 7.84 (s, 2H), 7.18 (d, *J* = 8.1 Hz, 2H), 7.06 (t, *J* = 7.6 Hz, 2H), 6.83 (d, *J* = 7.1 Hz, 2H), 6.67 (s, 2H), 4.55 (s, 2H), 2.65 (s, 6H). <sup>13</sup>C NMR (126 MHz, CDCl<sub>3</sub>) δ 137.0, 131.3, 125.9, 122.9, 122.0, 120.7, 117.5, 109.0, 25.8, 20.1.

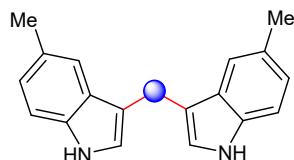

**bis(5-methyl-1H-indol-3-yl)methane (4c).**<sup>2</sup> White oil was obtained by column chromatography (eluent: EtOAc/petroleum ether = 1/100) with 74% isolated yield (50.7 mg). <sup>1</sup>H NMR (500 MHz, CDCl<sub>3</sub>) δ 7.75 (s, 2H), 7.40 (s, 2H), 7.22 (d, *J* = 8.3 Hz, 2H), 7.01 (d, *J* = 8.2 Hz, 2H), 6.83 (d, *J* = 0.9 Hz, 2H), 4.16 (s,



2H), 2.43 (s, 6H). <sup>13</sup>C NMR (126 MHz, CDCl<sub>3</sub>) δ 134.8, 128.3, 127.8, 123.4, 122.4, 118.8, 115.1, 110.7, 29.7, 21.5.

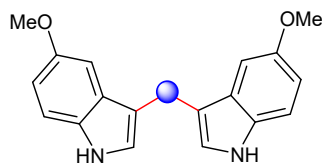

**bis(5-methoxy-1H-indol-3-yl)methane (5c).**<sup>2</sup> White oil was obtained by column chromatography (eluent: EtOAc/petroleum ether = 1/50) with 70% isolated yield (53.5 mg). <sup>1</sup>H NMR (500 MHz, DMSO *d*<sub>6</sub>) δ 10.57 (s, 2H), 7.23 (s, 1H), 7.21 (s, 1H), 7.09 (d, *J* = 2.1 Hz, 2H), 7.02 (d, *J* = 2.4 Hz, 2H), 6.71 (d, *J* = 2.4 Hz, 1H), 6.69 (d, *J* = 2.4 Hz, 1H), 4.07 (s, 2H), 3.71 (s, 6H). <sup>13</sup>C NMR (126 MHz, DMSO *d*<sub>6</sub>) δ 153.2, 132.0, 127.9, 123.9, 114.4, 112.3, 111.1, 101.1, 55.8, 21.3.

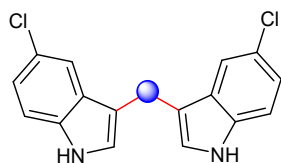

**bis(5-chloro-1H-indol-3-yl)methane (6c).**<sup>2</sup> Yellow oil was obtained by column chromatography (eluent: EtOAc/petroleum ether = 1/100) with 55% isolated yield (43.2 mg). <sup>1</sup>H NMR (500 MHz, DMSO *d*<sub>6</sub>) δ 10.99 (s, 2H), 7.51 (s, 2H), 7.34 (d, *J* = 8.6 Hz, 2H), 7.29 (d, *J* = 2.0 Hz, 2H), 7.03 (dd, *J* = 8.6, 1.9 Hz, 2H), 4.10 (s, 2H). <sup>13</sup>C NMR (126 MHz, DMSO *d*<sub>6</sub>) δ 135.3, 128.6, 125.2, 123.2, 121.1, 118.3, 114.2, 113.3, 21.0

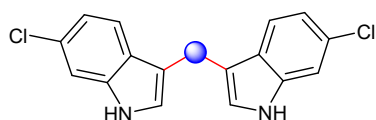

**bis(6-chloro-1H-indol-3-yl)methane (7c).**<sup>2</sup> Yellow oil was obtained by column chromatography (eluent: EtOAc/petroleum ether = 1/100) with 54% isolated yield (42.4 mg). <sup>1</sup>H NMR (500 MHz, DMSO *d*<sub>6</sub>) δ 10.92 (s, 2H), 7.49 (d, *J* = 8.4 Hz, 2H), 7.37 (s, 2H), 7.20 (s, 2H), 6.93 (d, *J* = 8.4 Hz, 2H), 4.11 (s, 2H). <sup>13</sup>C NMR (126 MHz, DMSO *d*<sub>6</sub>) δ 137.2, 126.3, 126.0, 124.4, 120.4, 118.8, 114.7, 111.4, 21.1.

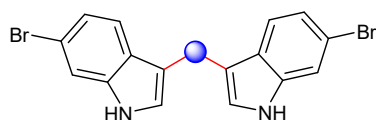

**bis(6-bromo-1H-indol-3-yl)methane (8c).**<sup>2</sup> Yellow oil was obtained by column chromatography (eluent: EtOAc/petroleum ether = 1/100) with 58% isolated yield (58.3 mg). <sup>1</sup>H NMR (500 MHz, DMSO *d*<sub>6</sub>) δ 10.92 (s, 2H), 7.50 (s, 2H), 7.44 (d, *J* = 8.4 Hz, 2H), 7.18 (s, 2H), 7.04 (d, *J* = 8.4 Hz, 2H), 4.10 (s, 2H). <sup>13</sup>C NMR (126 MHz, DMSO *d*<sub>6</sub>) δ 137.7, 126.5, 124.3, 121.4, 120.8, 114.7, 114.3, 114.1, 21.0.

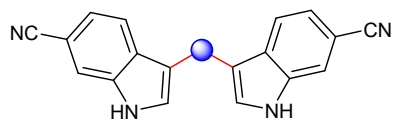

**3,3'-methylenebis(1H-indole-6-carbonitrile) (9c).**<sup>2h</sup> Brown oil was obtained by column chromatography (eluent: EtOAc/petroleum ether = 1/20) with 35% isolated yield (25.9 mg). <sup>1</sup>H NMR (500 MHz, DMSO *d*<sub>6</sub>) δ 11.39 (s, 2H), 7.82 (d, *J* = 0.6 Hz, 2H), 7.67 (d, *J* = 8.2 Hz, 2H), 7.50 (s, 2H), 7.26 (dd, *J* = 8.2, 1.3 Hz, 2H), 4.20 (s, 2H). <sup>13</sup>C NMR (126 MHz, DMSO *d*<sub>6</sub>) δ 135.5, 130.4, 128.1, 121.3, 121.2, 120.1, 116.7, 115.3, 102.6, 20.6.

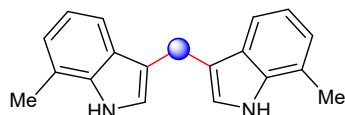

**bis(7-methyl-1H-indol-3-yl)methane (10c).**<sup>2</sup> Yellow oil was obtained by column chromatography (eluent: EtOAc/petroleum ether = 1/100) with 80% isolated yield (54.8 mg). <sup>1</sup>H NMR (500 MHz, CDCl<sub>3</sub>) δ 7.74 (s, 2H), 7.47 (d, *J* = 7.5 Hz, 2H), 7.00 - 6.99 (m, 4H), 6.87 (s, 2H), 4.21 (s, 2H), 2.45 (6, 1H). <sup>13</sup>C NMR (126 MHz, CDCl<sub>3</sub>) δ 136.0, 127.1, 122.4, 121.9, 120.2, 119.4, 117.0, 116.2, 29.7, 16.6.

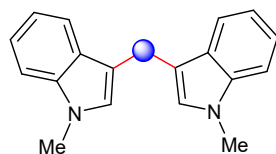

**bis(1-methyl-1H-indol-3-yl)methane (11c).**<sup>2d, 2i</sup> White oil was obtained by column chromatography (eluent: EtOAc/petroleum ether = 1/100) with 83% isolated yield (56.8 mg). <sup>1</sup>H NMR (500 MHz, CDCl<sub>3</sub>) δ 7.95 (d, *J* = 7.9 Hz, 2H), 7.55- 7.51 (m, 4H), 7.43 - 7.39 (m, 2H), 7.02 (s, 2H), 4.54 (s, 2H), 3.85 (s, 6H). <sup>13</sup>C NMR (126 MHz, CDCl<sub>3</sub>) δ 137.5, 128.3, 127.3, 121.7, 119.6, 118.9, 114.6, 109.4, 32.7, 21.3.

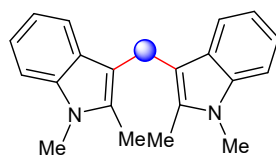

**bis(1,2-dimethyl-1H-indol-3-yl)methane (12c).**<sup>2i</sup> White oil was obtained by column chromatography (eluent: EtOAc/petroleum ether = 1/100) with 77% isolated yield (58.1 mg). <sup>1</sup>H NMR (500 MHz, CDCl<sub>3</sub>) δ 7.41 (d, *J* = 7.9 Hz, 2H), 7.18 (d, *J* = 8.1 Hz, 2H), 7.08 (t, *J* = 7.6 Hz, 2H), 6.95 (t, *J* = 7.4 Hz, 2H), 4.13 (s, 2H), 3.59 (s, 6H), 2.34 (s, 6H). <sup>13</sup>C NMR (126 MHz, CDCl<sub>3</sub>) δ 136.6, 132.7, 128.1, 120.3, 118.6, 118.5, 110.4, 108.4, 29.5, 20.0, 10.5.

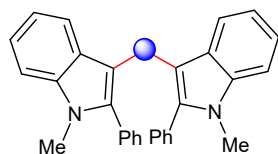

**bis(1-methyl-2-phenyl-1H-indol-3-yl)methane (13c).**<sup>2i</sup> Yellow solid was obtained by column chromatography (eluent: EtOAc/petroleum ether = 1/75) with 75% isolated yield (79.8 mg). <sup>1</sup>H NMR (500 MHz, CDCl<sub>3</sub>) δ 7.42 – 7.33 (m, 6H), 7.30 – 7.26 (m, 4H), 7.24 (d, *J* = 7.9 Hz, 2H), 7.18 (d, *J* = 7.9 Hz, 2H), 7.12 (t, *J* = 7.6 Hz, 2H), 6.88 (t, *J* = 7.5 Hz, 2H), 4.20 (s, 2H), 3.52 (s, 6H). <sup>13</sup>C NMR (126 MHz, DMSO) δ 137.7, 137.3, 132.3, 130.9, 128.2, 128.1, 127.8, 121.3, 119.9, 118.9, 112.3, 109.0, 30.8, 21.1.

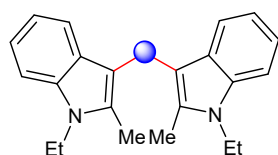

**bis(1-ethyl-2-methyl-1H-indol-3-yl)methane (14c).**<sup>2i</sup> White solid was obtained by column chromatography (eluent: EtOAc/petroleum ether = 1/100) with 76% isolated yield (62.7 mg). <sup>1</sup>H NMR (500 MHz, CDCl<sub>3</sub>) δ 7.40 (d, *J* = 7.9 Hz, 2H), 7.21 (d, *J* = 8.1 Hz, 2H), 7.07 (t, *J* = 7.6 Hz, 2H), 6.94 (t, *J* = 7.4 Hz, 2H), 4.14 (s, 2H), 4.06 (q, *J* = 7.1 Hz, 4H), 2.33 (s, 6H), 1.26 (t, *J* = 7.2 Hz, 6H). <sup>13</sup>C NMR (126 MHz, CDCl<sub>3</sub>) δ 135.5, 131.9, 128.4, 120.2, 118.6, 118.5, 110.5, 108.4, 37.7, 20.0, 15.4, 10.3.

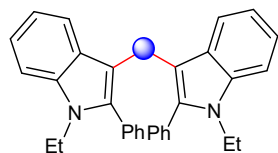

**bis(1-ethyl-2-phenyl-1H-indol-3-yl)methane (15c).**<sup>2i</sup> White solid was obtained by column chromatography (eluent: EtOAc/petroleum ether = 1/100) with 79% isolated yield (89.6 mg). <sup>1</sup>H NMR (500 MHz, CDCl<sub>3</sub>) δ 7.40 – 7.33 (m, 6H), 7.27 (d, *J* = 8.2 Hz, 2H), 7.22 – 7.17 (m, 6H), 7.11 (t, *J* = 7.6 Hz, 2H), 6.89 (t, *J* = 7.5 Hz, 2H), 4.10 (s, 2H), 3.97 (q, *J* = 7.1 Hz, 4H), 1.14 (t, *J* = 7.1 Hz, 6H). <sup>13</sup>C NMR (126 MHz, CDCl<sub>3</sub>) δ 137.1, 135.9, 132.6, 130.7, 128.3, 128.1, 127.7, 121.1, 119.8, 118.7, 112.5, 109.2, 38.4, 20.7, 15.3.

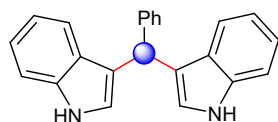

**3,3'-(phenylmethylene)bis(1H-indole) (16c).**<sup>2</sup> Yellow solid was obtained by column chromatography (eluent: EtOAc/petroleum ether = 1/4) with 71% isolated yield (42.6 mg). <sup>1</sup>H NMR (500 MHz, CDCl<sub>3</sub>) δ 7.37 (d, *J* = 8.0 Hz, 2H), 7.32 (d, *J* = 7.3 Hz, 2H), 7.28 (d, *J* = 8.1 Hz, 2H), 7.25 (t, *J* = 7.5 Hz, 2H), 7.19 (t, *J* = 7.2 Hz, 1H), 7.14 (t, *J* = 7.5 Hz, 2H), 6.98 (t, *J* = 7.5 Hz, 2H), 6.55 (d, *J* = 2.0 Hz, 2H), 5.85

(s, 1H).  $^{13}\text{C}$  NMR (126 MHz,  $\text{CDCl}_3$ )  $\delta$  144.05, 136.7, 128.7, 128.2, 127.1, 126.1, 123.6, 121.9, 119.9, 119.7, 119.2, 111.0, 40.2.

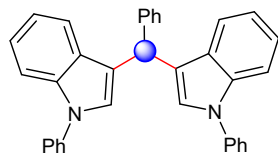

**3,3'-(phenylmethylene)bis(1-phenyl-1H-indole) (17c).**<sup>2f</sup> White solid was obtained by column chromatography (eluent: EtOAc/petroleum ether = 1/50) with 78% isolated yield (92.4 mg).  $^1\text{H}$  NMR (500 MHz,  $\text{CDCl}_3$ )  $\delta$  7.56 (d,  $J$  = 8.3 Hz, 2H), 7.49 (d,  $J$  = 7.9 Hz, 2H), 7.46 – 7.39 (m, 10H), 7.30 (t,  $J$  = 7.5 Hz, 2H), 7.28 – 7.23 (m, 2H), 7.23 – 7.17 (m, 3H), 7.06 (t,  $J$  = 7.1 Hz, 2H), 6.89 (d,  $J$  = 0.8 Hz, 2H), 5.98 (s, 1H).  $^{13}\text{C}$  NMR (126 MHz,  $\text{CDCl}_3$ )  $\delta$  143.5, 139.8, 136.5, 129.5, 128.8, 128.5, 128.4, 127.3, 126.4, 126.1, 124.2, 122.4, 120.4, 120.3, 119.9, 110.5, 40.2.

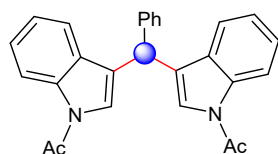

**1,1'-((phenylmethylene)bis(1H-indole-3,1-diyl))bis(ethan-1-one) (18c).** Yellow oil was obtained by column chromatography (eluent: EtOAc/petroleum ether = 1/20) with 76% isolated yield (77.1 mg).  $^1\text{H}$  NMR (500 MHz,  $\text{CDCl}_3$ )  $\delta$  8.44 (d,  $J$  = 5.6 Hz, 2H), 7.40 – 7.26 (m, 9H), 7.18 (t,  $J$  = 7.5 Hz, 2H), 6.86 (s, 2H), 5.73 (s, 1H), 2.45 (s, 6H).  $^{13}\text{C}$  NMR (126 MHz,  $\text{CDCl}_3$ )  $\delta$  168.6, 140.7, 136.3, 130.2, 129.7, 128.8, 128.5, 127.2, 125.5, 124.1, 123.6, 119.8, 116.7, 39.9, 24.0. HRMS (ESI)  $m/z$ :  $[\text{M}+\text{H}]^+$  calcd for  $\text{C}_{27}\text{H}_{23}\text{N}_2\text{O}_2$  407.1754; found: 407.1753.

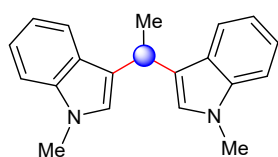

**3,3'-(ethane-1,1-diyl)bis(1-methyl-1H-indole) (21c).**<sup>2b</sup> Yellow oil was obtained by column chromatography (eluent: EtOAc/petroleum ether = 1/5) with 77% isolated yield (38.9 mg).  $^1\text{H}$  NMR (500 MHz,  $\text{CDCl}_3$ )  $\delta$  7.58 (d,  $J$  = 7.9 Hz, 2H), 7.27 (d,  $J$  = 8.2 Hz, 2H), 7.19 (t,  $J$  = 7.6 Hz, 2H), 7.03 (t,  $J$  = 7.4 Hz, 2H), 6.77 (s, 2H), 4.66 (q,  $J$  = 7.0 Hz, 1H), 3.69 (s, 6H), 1.78 (d,  $J$  = 7.1 Hz, 3H).  $^{13}\text{C}$  NMR (126 MHz,  $\text{CDCl}_3$ )  $\delta$  137.3, 127.3, 126.0, 121.3, 120.3, 119.8, 118.4, 109.1, 32.6, 28.0, 22.2.

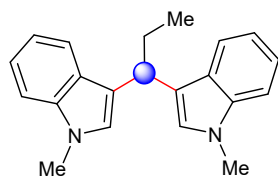

**3,3'-(propane-1,1-diyl)bis(1-methyl-1H-indole) (22c).**<sup>2b</sup> Yellow oil was obtained by column chromatography (eluent: EtOAc/petroleum ether = 1/100) with 62 % isolated yield (46.8 mg). <sup>1</sup>H NMR (500 MHz, CDCl<sub>3</sub>) δ 7.60 (d, *J* = 8.0 Hz, 2H), 7.25 (d, *J* = 8.2 Hz, 2H), 7.17 (t, *J* = 7.1 Hz, 2H), 7.02 (t, *J* = 7.0 Hz, 2H), 6.83 (s, 2H), 4.36 (t, *J* = 7.4 Hz, 1H), 3.69 (s, 6H), 2.22 (p, *J* = 7.3 Hz, 2H), 1.00 (t, *J* = 7.3 Hz, 3H). <sup>13</sup>C NMR (126 MHz, CDCl<sub>3</sub>) δ 137.3, 127.6, 126.2, 121.2, 119.8, 119.0, 118.4, 109.1, 35.8, 32.6, 29.2, 13.2.

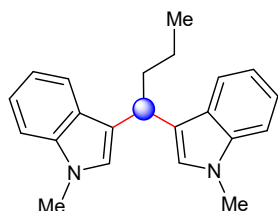

**3,3'-(butane-1,1-diyl)bis(1-methyl-1H-indole) (23c).**<sup>2b</sup> Yellow oil was obtained by column chromatography (eluent: EtOAc/petroleum ether = 1/100) with 32 % isolated yield (25.3 mg). <sup>1</sup>H NMR (500 MHz, CDCl<sub>3</sub>) δ 7.60 (d, *J* = 8.0 Hz, 2H), 7.23 (d, *J* = 8.2 Hz, 2H), 7.16 (t, *J* = 7.2 Hz, 2H), 7.02 (t, *J* = 7.5 Hz, 2H), 6.82 (s, 2H), 4.47 (t, *J* = 7.5 Hz, 1H), 3.65 (s, 6H), 2.17 (dd, *J* = 15.3, 7.6 Hz, 2H), 1.46 – 1.37 (m, 2H), 0.94 (t, *J* = 7.4 Hz, 3H). <sup>13</sup>C NMR (126 MHz, CDCl<sub>3</sub>) δ 137.3, 127.6, 126.2, 121.3, 119.8, 119.3, 118.4, 109.1, 38.7, 33.6, 32.6, 21.6, 14.3.

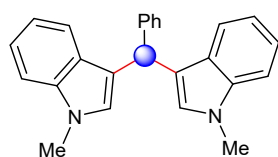

**3,3'-(phenylmethylene)bis(1-methyl-1H-indole) (24c).**<sup>2a</sup> Yellow oil was obtained by column chromatography (eluent: EtOAc/petroleum ether = 1/100) with 84% isolated yield (73.5 mg). <sup>1</sup>H NMR (500 MHz, CDCl<sub>3</sub>) δ 7.30 (d, *J* = 8.0 Hz, 2H), 7.26 (d, *J* = 7.4 Hz, 2H), 7.19 (t, *J* = 8.0 Hz, 4H), 7.12 (dd, *J* = 14.9, 7.5 Hz, 3H), 6.91 (t, *J* = 7.3 Hz, 2H), 6.44 (s, 2H), 5.80 (s, 1H), 3.58 (s, 6H). <sup>13</sup>C NMR (126 MHz, CDCl<sub>3</sub>) δ 144.5, 137.4, 128.7, 128.3, 128.2, 127.5, 126.0, 121.4, 120.0, 118.6, 118.3, 109.1, 40.1, 32.7.

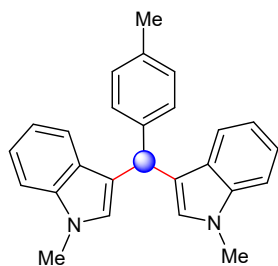

**3,3'-(p-tolylmethylene)bis(1-methyl-1H-indole) (25c).**<sup>2a</sup> White oil was obtained by column chromatography (eluent: EtOAc/petroleum ether = 1/100) with 74% isolated yield (67.3 mg). <sup>1</sup>H NMR (500 MHz, CDCl<sub>3</sub>) δ 7.38 (d, *J* = 7.9 Hz, 2H), 7.27 (d, *J* = 8.2 Hz, 2H), 7.22 (d, *J* = 7.9 Hz, 2H), 7.18 (t, *J* = 7.6 Hz, 2H), 7.07 (d, *J* = 7.7 Hz, 2H), 6.98 (t, *J* = 7.5 Hz, 2H), 6.52 (s, 2H), 5.84 (s, 1H), 3.66 (s, 6H), 2.31 (s, 3H). <sup>13</sup>C NMR (126 MHz, CDCl<sub>3</sub>) δ 141.4, 137.4, 135.3, 128.9, 128.5, 128.2, 127.5, 121.3, 120.1, 118.6, 118.4, 109.0, 39.6, 32.6, 21.1.

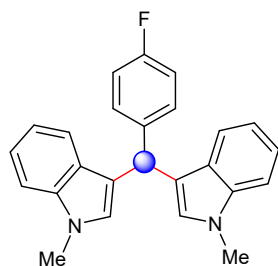

**3,3'-((4-fluorophenyl)methylene)bis(1-methyl-1H-indole) (26c).**<sup>2a</sup> Yellow oil was obtained by column chromatography (eluent: EtOAc/petroleum ether = 1/100) with 74% isolated yield (68.1 mg). <sup>1</sup>H NMR (500 MHz, CDCl<sub>3</sub>) δ 7.35 (d, *J* = 7.9 Hz, 2H), 7.28 (t, *J* = 7.8 Hz, 4H), 7.20 (t, *J* = 7.6 Hz, 2H), 7.00 (t, *J* = 7.5 Hz, 2H), 6.95 (t, *J* = 8.7 Hz, 2H), 6.50 (s, 2H), 5.86 (s, 1H), 3.68 (s, 6H). <sup>13</sup>C NMR (126 MHz, CDCl<sub>3</sub>) δ 161.3 (d, *J* = 243.8 Hz), 140.1, 137.4, 130.0 (d, *J* = 7.8 Hz), 128.2, 127.3, 121.5, 119.9, 118.7, 118.1, 114.9 (d, *J* = 21.1 Hz), 109.1, 39.3, 32.7. <sup>19</sup>F NMR (471 MHz, CDCl<sub>3</sub>) δ -117.5.

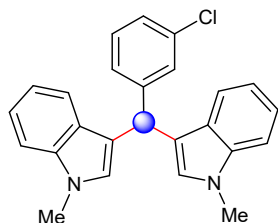

**3,3'-((3-chlorophenyl)methylene)bis(1-methyl-1H-indole) (27c).**<sup>2a</sup> Yellow oil was obtained by column chromatography (eluent: EtOAc/petroleum ether = 1/100) with 73% isolated yield (70.1 mg). <sup>1</sup>H NMR (500 MHz, CDCl<sub>3</sub>) δ 7.35 (d, *J* = 7.9 Hz, 2H), 7.32 (s, 1H), 7.25 (d, *J* = 8.2 Hz, 2H), 7.22 – 7.18 (m, 2H), 7.17 (s, 1H), 7.17 (s, 1H), 7.16 – 7.14 (m, 2H), 6.98 (t, *J* = 7.5 Hz, 2H), 6.50 (s, 2H), 5.84 (s,

1H), 3.60 (s, 6H). <sup>13</sup>C NMR (126 MHz, CDCl<sub>3</sub>) δ 146.8, 137.5, 134.1, 129.6, 128.8, 128.4, 127.4, 127.0, 126.4, 121.7, 119.9, 118.9, 117.6, 109.3, 40.0, 32.7.

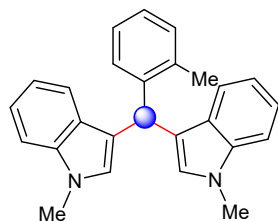

**3,3'-(*o*-tolylmethylene)bis(1-methyl-1H-indole) (28c).**<sup>2a</sup> White oil was obtained by column chromatography (eluent: EtOAc/petroleum ether = 1/100) with 73% isolated yield (66.4 mg). <sup>1</sup>H NMR (500 MHz, CDCl<sub>3</sub>) δ 7.34 (d, *J* = 7.9 Hz, 2H), 7.28 (d, *J* = 8.2 Hz, 2H), 7.22 – 7.16 (m, 3H), 7.15 – 7.09 (m, 2H), 7.03 (t, *J* = 7.4 Hz, 1H), 6.99 (t, *J* = 7.1 Hz, 2H), 6.44 (s, 2H), 6.02 (s, 1H), 3.66 (s, 6H), 2.38 (s, 3H). <sup>13</sup>C NMR (126 MHz, CDCl<sub>3</sub>) δ 142.5, 137.4, 136.0, 130.1, 128.5, 128.4, 127.6, 125.9, 125.8, 121.4, 119.9, 118.6, 117.7, 109.0, 60.4, 32.6, 19.6.

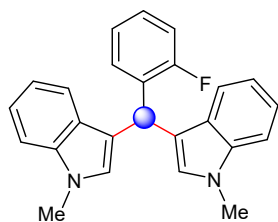

**3,3'-(2-fluorophenyl)methylenebis(1-methyl-1H-indole) (29c).**<sup>2a</sup> Yellow oil was obtained by column chromatography (eluent: EtOAc/petroleum ether = 1/100) with 74% isolated yield (68.1 mg). <sup>1</sup>H NMR (500 MHz, CDCl<sub>3</sub>) δ 7.36 (d, *J* = 7.8 Hz, 2H), 7.28 (d, *J* = 8.2 Hz, 2H), 7.22 – 7.15 (m, 4H), 7.05 (t, *J* = 9.2 Hz, 1H), 6.98 (q, *J* = 7.4 Hz, 3H), 6.58 (s, 2H), 6.19 (s, 1H), 3.66 (s, 6H). <sup>13</sup>C NMR (126 MHz, CDCl<sub>3</sub>) δ 160.4 (d, *J* = 245.7 Hz), 137.3, 131.2 (d, *J* = 14.2 Hz), 130.2 (d, *J* = 4.1 Hz), 128.1, 127.6 (d, *J* = 8.1 Hz), 127.1, 123.8 (d, *J* = 3.4 Hz), 121.4, 119.6, 118.6, 116.6, 115.1 (d, *J* = 22.3 Hz), 109.1, 32.6, 32.1 (d, *J* = 4.0 Hz). <sup>19</sup>F NMR (471 MHz, CDCl<sub>3</sub>) δ -118.7.

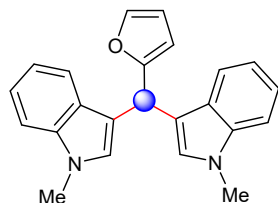

**3,3'-(furan-2-ylmethylene)bis(1-methyl-1H-indole) (30c).**<sup>2</sup> Yellow oil was obtained by column chromatography (eluent: EtOAc/petroleum ether = 1/100) with 64% isolated yield (54.4 mg). <sup>1</sup>H NMR (500 MHz, CDCl<sub>3</sub>) δ 7.46 (d, *J* = 8.0 Hz, 2H), 7.33 (s, 1H), 7.25 (d, *J* = 8.2 Hz, 2H), 7.18 (t, *J* = 7.6 Hz,

2H), 7.01 (t,  $J = 7.5$  Hz, 2H), 6.71 (s, 2H), 6.27 (dd,  $J = 3.0, 1.9$  Hz, 1H), 6.04 (d,  $J = 3.1$  Hz, 1H), 5.92 (s, 1H), 3.62 (s, 6H).  $^{13}\text{C}$  NMR (126 MHz,  $\text{CDCl}_3$ )  $\delta$  157.5, 141.2, 137.3, 127.7, 127.2, 121.5, 119.8, 118.9, 115.8, 110.2, 109.3, 106.5, 34.0, 32.7.

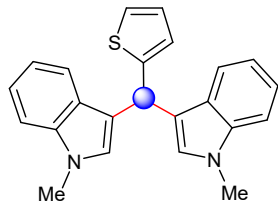

**3,3'-(thiophen-2-ylmethylene)bis(1-methyl-1H-indole) (31c).**<sup>2</sup> Yellow oil was obtained by column chromatography (eluent: EtOAc/petroleum ether = 1/100) with 63% isolated yield (56.1 mg).  $^1\text{H}$  NMR (500 MHz,  $\text{CDCl}_3$ )  $\delta$  7.45 (d,  $J = 7.9$  Hz, 2H), 7.29 (d,  $J = 8.2$  Hz, 2H), 7.20 (t,  $J = 7.6$  Hz, 2H), 7.14 (d,  $J = 4.9$  Hz, 1H), 7.02 (t,  $J = 7.4$  Hz, 2H), 6.93 – 6.87 (m, 2H), 6.71 (s, 2H), 6.15 (s, 1H), 3.69 (s, 6H).  $^{13}\text{C}$  NMR (126 MHz,  $\text{CDCl}_3$ )  $\delta$  149.2, 137.3, 127.8, 127.1, 126.4, 125.0, 123.4, 121.5, 119.8, 118.8, 118.2, 109.1, 35.2, 32.7.

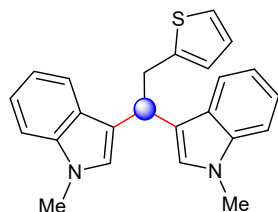

**3,3'-(2-(thiophen-2-yl)ethane-1,1-diyl)bis(1-methyl-1H-indole) (32c).**<sup>2</sup> Yellow oil was obtained by column chromatography (eluent: EtOAc/petroleum ether = 1/100) with 66% isolated yield (61.1 mg).  $^1\text{H}$  NMR (500 MHz,  $\text{CDCl}_3$ )  $\delta$  7.56 (d,  $J = 7.9$  Hz, 2H), 7.22 (d,  $J = 8.2$  Hz, 2H), 7.16 (dd,  $J = 11.1, 3.9$  Hz, 2H), 7.06 (dd,  $J = 4.9, 3.0$  Hz, 1H), 7.01 (t,  $J = 7.4$  Hz, 2H), 6.80 (d,  $J = 4.9$  Hz, 1H), 6.76 - 6.75 (m, 3H), 4.78 (t,  $J = 7.3$  Hz, 1H), 3.60 (s, 6H), 3.51 (d,  $J = 7.3$  Hz, 2H).  $^{13}\text{C}$  NMR (126 MHz,  $\text{CDCl}_3$ )  $\delta$  141.8, 137.4, 128.8, 127.5, 126.7, 124.6, 121.4, 121.2, 119.8, 118.6, 118.4, 109.2, 36.9, 35.4, 32.7.

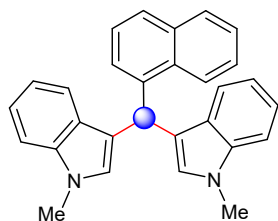

**3,3'-(naphthalen-1-ylmethylene)bis(1-methyl-1H-indole) (33c).**<sup>2b</sup> White solid was obtained by column chromatography (eluent: EtOAc/petroleum ether = 1/100) with 46% isolated yield (46.1 mg).  $^1\text{H}$  NMR (500 MHz,  $\text{CDCl}_3$ )  $\delta$  8.17 (d,  $J = 8.5$  Hz, 1H), 7.87 (d,  $J = 8.0$  Hz, 1H), 7.73 (d,  $J = 7.9$  Hz, 1H),



7.44 (t,  $J = 7.0$  Hz, 1H), 7.37 (dd,  $J = 12.6, 4.5$  Hz, 3H), 7.33 – 7.25 (m, 4H), 7.20 (t,  $J = 7.6$  Hz, 2H), 6.98 (t,  $J = 7.4$  Hz, 2H), 6.66 (s, 1H), 6.44 (s, 2H), 3.63 (s, 6H).  $^{13}\text{C}$  NMR (126 MHz,  $\text{CDCl}_3$ )  $\delta$  140.0, 137.5, 133.9, 131.8, 128.9, 128.6, 127.4, 126.8, 126.1, 125.8, 125.5, 125.2, 124.3, 121.4, 119.9, 118.6, 117.9, 109.0, 35.6, 32.7.

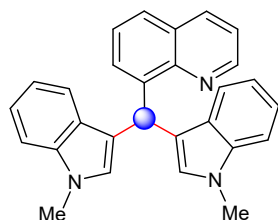

**8-(bis(1-methyl-1H-indol-3-yl)methyl)quinolone (34c).**<sup>2j</sup> White solid was obtained by column chromatography (eluent: EtOAc/petroleum ether = 1/100) with 36% isolated yield (36.1 mg).  $^1\text{H}$  NMR (500 MHz,  $\text{CDCl}_3$ )  $\delta$  8.92 (dd,  $J = 4.1, 1.8$  Hz, 1H), 8.13 (dd,  $J = 8.3, 1.8$  Hz, 1H), 7.65 (dd,  $J = 15.5, 7.7$  Hz, 2H), 7.51 (s, 1H), 7.41 (d,  $J = 8.0$  Hz, 3H), 7.39 – 7.35 (m, 1H), 7.24 (d,  $J = 8.2$  Hz, 2H), 7.15 (t,  $J = 7.1$  Hz, 2H), 6.93 (t,  $J = 7.5$  Hz, 2H), 6.53 (s, 2H), 3.62 (s, 6H).  $^{13}\text{C}$  NMR (126 MHz,  $\text{CDCl}_3$ )  $\delta$  149.7, 146.2, 143.0, 137.5, 136.2, 129.4, 128.4, 128.3, 127.7, 126.3, 126.0, 121.2, 120.9, 120.5, 118.8, 118.4, 108.9, 32.8, 32.6.

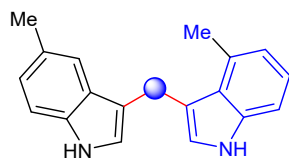

**37c**, 52%  
(**3c** : **4c** : **37c** = 23 : 25 : 52)

**5-methyl-3-((4-methyl-1H-indol-3-yl)methyl)-1H-indole (37c).** Brown oil was obtained 71.9 mg (**3c** : **4c** : **37c** = 23 : 25 : 52) by column chromatography (eluent: EtOAc/petroleum ether = 1/100).  $^1\text{H}$  NMR (500 MHz,  $\text{CDCl}_3$ )  $\delta$  7.47 (dd,  $J = 26.9, 14.0$  Hz, 3.85H), 7.38 (s, 2H), 7.11 (dd,  $J = 8.3, 2.2$  Hz, 2H), 7.07 – 7.01 (m, 4H), 6.98 (t,  $J = 7.7$  Hz, 2H), 6.81 (t,  $J = 5.8$  Hz, 2H), 6.67 (d,  $J = 1.3$  Hz, 0.85H), 6.59 (d,  $J = 1.6$  Hz, 1H), 6.51 (d,  $J = 1.2$  Hz, 1H), 6.46 (d,  $J = 1.6$  Hz, 0.85H), 4.48 (s, 0.9H), 4.28 (s, 2H), 4.11 (s, 0.95H), 2.61 (s, 2.75H), 2.58 (s, 3H), 2.42 (s, 3H), 2.40 (s, 2.75H).  $^{13}\text{C}$  NMR (126 MHz,  $\text{CDCl}_3$ )  $\delta$  137.0, 137.0, 131.4, 131.4, 128.4, 128.4, 127.8, 127.6, 126.2, 126.0, 123.6, 123.5, 123.1, 123.0, 122.9, 122.6, 122.0, 120.8, 120.8, 118.9, 117.4, 116.4, 116.1, 115.1, 110.9, 109.1, 29.8, 25.8, 23.5, 21.6, 21.2, 20.2, 20.1. HRMS (ESI)  $m/z$ :  $[\text{M}+\text{H}]^+$  calcd for  $\text{C}_{19}\text{H}_{19}\text{N}_2$  275.1543; found: 275.1541.

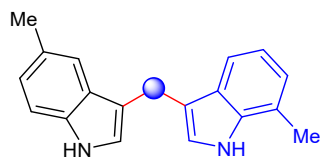

**38c**, 50%  
(**4c** : **10c** : **38c** = 25 : 25 : 50)

**7-methyl-3-((5-methyl-1H-indol-3-yl)methyl)-1H-indole (38c)**. Brown oil was obtained 83.0 mg (**4c** : **10c** : **38c** = 25 : 25 : 50) by column chromatography (eluent: EtOAc/petroleum ether = 1/100). <sup>1</sup>H NMR (500 MHz, CDCl<sub>3</sub>) δ 7.53 (d, *J* = 15.2 Hz, 4H), 7.45 (d, *J* = 7.4 Hz, 2H), 7.38 (s, 2H), 7.13 (d, *J* = 8.2 Hz, 2H), 7.03 – 6.94 (m, 6H), 6.73 – 6.66 (m, 4H), 4.16 (s, 1H), 4.14 (s, 2H), 4.12 (s, 1H), 2.41 (s, 6H), 2.38 (s, 6H). <sup>13</sup>C NMR (126 MHz, CDCl<sub>3</sub>) δ 136.1, 136.0, 134.8, 134.7, 128.4, 127.9, 127.8, 127.2, 127.2, 123.5, 122.5, 122.4, 122.1, 120.3, 119.4, 119.0, 118.9, 117.1, 117.0, 116.3, 116.2, 115.2, 115.1, 110.8, 21.6, 21.4, 21.3, 21.2, 16.5. HRMS (ESI) *m/z*: [M+H]<sup>+</sup> calcd for C<sub>19</sub>H<sub>19</sub>N<sub>2</sub> 275.1543; found: 275.1541.

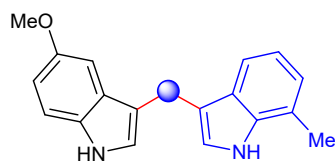

**39c**, 52%  
(**5c** : **10c** : **39c** = 24 : 24 : 52)

**5-methoxy-3-((7-methyl-1H-indol-3-yl)methyl)-1H-indole (39c)**. Brown oil was obtained 77.3 mg (**5c** : **10c** : **38c** = 25 : 25 : 50) by column chromatography (eluent: EtOAc/petroleum ether = 1/100). <sup>1</sup>H NMR (500 MHz, CDCl<sub>3</sub>) δ 7.58 (d, *J* = 19.6 Hz, 4H), 7.49 – 7.40 (m, 2H), 7.08 (dd, *J* = 8.8, 2.1 Hz, 2H), 7.03 (s, 2H), 7.00 (td, *J* = 7.4, 2.6 Hz, 2H), 6.95 (d, *J* = 6.9 Hz, 2H), 6.81 (dd, *J* = 8.7, 2.2 Hz, 2H), 6.69 (s, 3H), 4.15 (s, 0.95H), 4.12 (s, 2H), 4.09 (s, 0.95H), 3.76 (s, 5.5H), 2.35 (s, 5.5H). <sup>13</sup>C NMR (126 MHz, CDCl<sub>3</sub>) δ 153.8, 153.7, 136.1, 136.0, 131.7, 128.1, 128.0, 127.2, 127.1, 123.3, 123.2, 122.5, 122.4, 122.2, 122.1, 120.5, 120.4, 119.5, 119.4, 117.1, 117.0, 116.1, 116.0, 115.3, 115.2, 101.3, 101.2, 56.0, 21.5, 21.4, 21.3, 16.5. HRMS (ESI) *m/z*: [M+H]<sup>+</sup> calcd for C<sub>19</sub>H<sub>19</sub>N<sub>2</sub>O 291.1492; found: 291.1490.

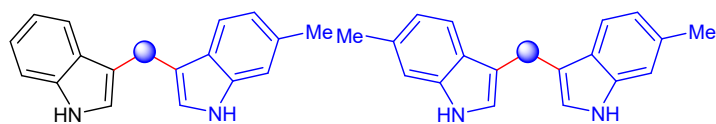

**40c**, 47%  
(**1c** : **40c** : **41c** = 32 : 47 : 21)

**41c** = **21a** + **1b** + **21a**

**3-((1H-indol-3-yl)methyl)-6-methyl-1H-indole (40c)**. Brown oil was obtained 51.7 mg (**1c** : **40c** : **41c** = 32 : 47 : 21) by column chromatography (eluent: EtOAc/petroleum ether = 1/100). <sup>1</sup>H NMR (500 MHz, CDCl<sub>3</sub>) δ 7.58 (dd, *J* = 7.8, 3.7 Hz, 3H), 7.55 (s, 2H), 7.48 (s, 1.8H), 7.38 (s, 1.85H), 7.21 (d, *J* = 8.1 Hz,

2H), 7.16 (d,  $J = 7.1$  Hz, 2H), 7.13 (dd,  $J = 12.3, 6.5$  Hz, 2H), 7.07 (t,  $J = 7.4$  Hz, 2H), 6.98 (d,  $J = 8.2$  Hz, 1.85H), 6.70 (d,  $J = 12.9$  Hz, 4H), 4.17 (s, 1.35H), 4.14 (s, 2H), 4.12 (s, 0.9H), 2.41 (s, 5.6H).  $^{13}\text{C}$  NMR (126 MHz,  $\text{CDCl}_3$ )  $\delta$  136.5, 136.4, 134.8, 134.8, 128.5, 128.4, 127.8, 127.6, 123.5, 123.4, 122.6, 122.4, 121.9, 119.3, 119.2, 119.1, 118.9, 118.8, 115.7, 115.6, 115.1, 115.0, 111.2, 110.9, 21.6, 21.2, 21.1. HRMS (ESI)  $m/z$ :  $[\text{M}+\text{H}]^+$  calcd for  $\text{C}_{18}\text{H}_{17}\text{N}_2$  261.1386; found: 261.1382.

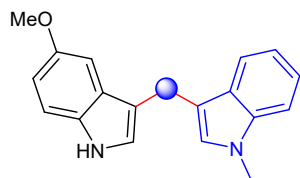

**42c**, 37%  
(**5c** : **11c** : **42c** = 17 : 53 : 30)

**5-methoxy-3-((1-methyl-1H-indol-3-yl)methyl)-1H-indole (42c)**. Brown oil was obtained **42c**, 17.9 mg, 37% yield), **11c** (30.9 mg, 68%), **5c** (11.3 mg, 22%), (**5c** : **11c** : **42c** = 18 : 68 : 29) by column chromatography (eluent: EtOAc/petroleum ether = 1/100).  $^1\text{H}$  NMR (500 MHz,  $\text{CDCl}_3$ )  $\delta$  7.77 (s, 1H), 7.62 (d,  $J = 7.9$  Hz, 1H), 7.28 (d,  $J = 8.2$  Hz, 1H), 7.22 (dd,  $J = 4.7, 2.2$  Hz, 2H), 7.08 (t,  $J = 7.4$  Hz, 1H), 7.05 (d,  $J = 2.4$  Hz, 1H), 6.89 (d,  $J = 2.1$  Hz, 1H), 6.84 (dd,  $J = 8.8, 2.4$  Hz, 1H), 4.18 (s, 2H), 3.80 (s, 3H), 3.68 (s, 3H).  $^{13}\text{C}$  NMR (126 MHz,  $\text{CDCl}_3$ )  $\delta$  153.8, 137.2, 131.6, 127.9, 127.8, 127.0, 123.0, 121.4, 119.3, 118.6, 115.5, 114.1, 112.0, 111.7, 109.1, 101.1, 55.9, 32.5, 21.1. HRMS (ESI)  $m/z$ :  $[\text{M}+\text{H}]^+$  calcd for  $\text{C}_{19}\text{H}_{19}\text{N}_2\text{O}$  291.1492; found: 291.1490.

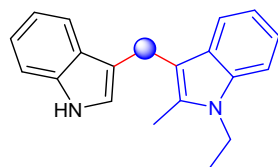

**43c**, 61%  
(**1c**, 15%)

**3-((1H-indol-3-yl)methyl)-1-ethyl-2-methyl-1H-indole (43c)**. Brown oil was obtained **43c** (43.9 mg, 61%), **1c** (9.2 mg, 15%) by column chromatography (eluent: EtOAc/petroleum ether = 1/100).  $^1\text{H}$  NMR (500 MHz,  $\text{DMSO}-d_6$ )  $\delta$  10.70 (s, 1H), 7.51 (d,  $J = 7.9$  Hz, 1H), 7.47 (d,  $J = 7.8$  Hz, 1H), 7.33 (dd,  $J = 8.1, 3.1$  Hz, 2H), 7.03 (dd,  $J = 15.1, 7.6$  Hz, 2H), 6.99 (s, 1H), 6.93 (dd,  $J = 15.5, 7.7$  Hz, 2H), 4.15 (q,  $J = 7.1$  Hz, 2H), 4.11 (s, 2H), 2.44 (s, 3H), 1.22 (t,  $J = 7.1$  Hz, 3H).  $^{13}\text{C}$  NMR (126 MHz,  $\text{DMSO } d_6$ )  $\delta$  136.8, 135.6, 132.5, 128.2, 127.5, 123.1, 121.2, 120.4, 118.9, 118.6, 118.5, 115.1, 111.7, 10.2, 109.2, 37.6, 20.3, 15.7, 10.3. HRMS (ESI)  $m/z$ :  $[\text{M}+\text{H}]^+$  calcd for  $\text{C}_{20}\text{H}_{21}\text{N}_2$  289.1699; found: 289.1694.

## 7 Copies of product NMR and HRMS Spectra

1c

<sup>1</sup>H NMR

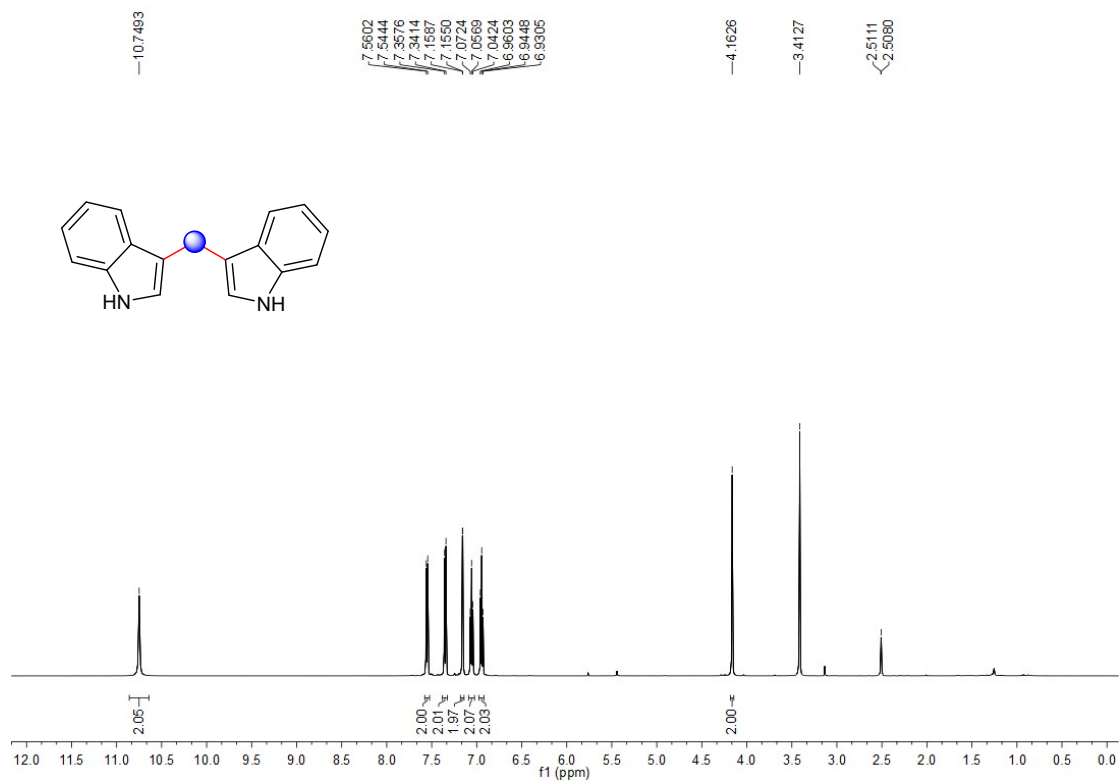

<sup>13</sup>C NMR

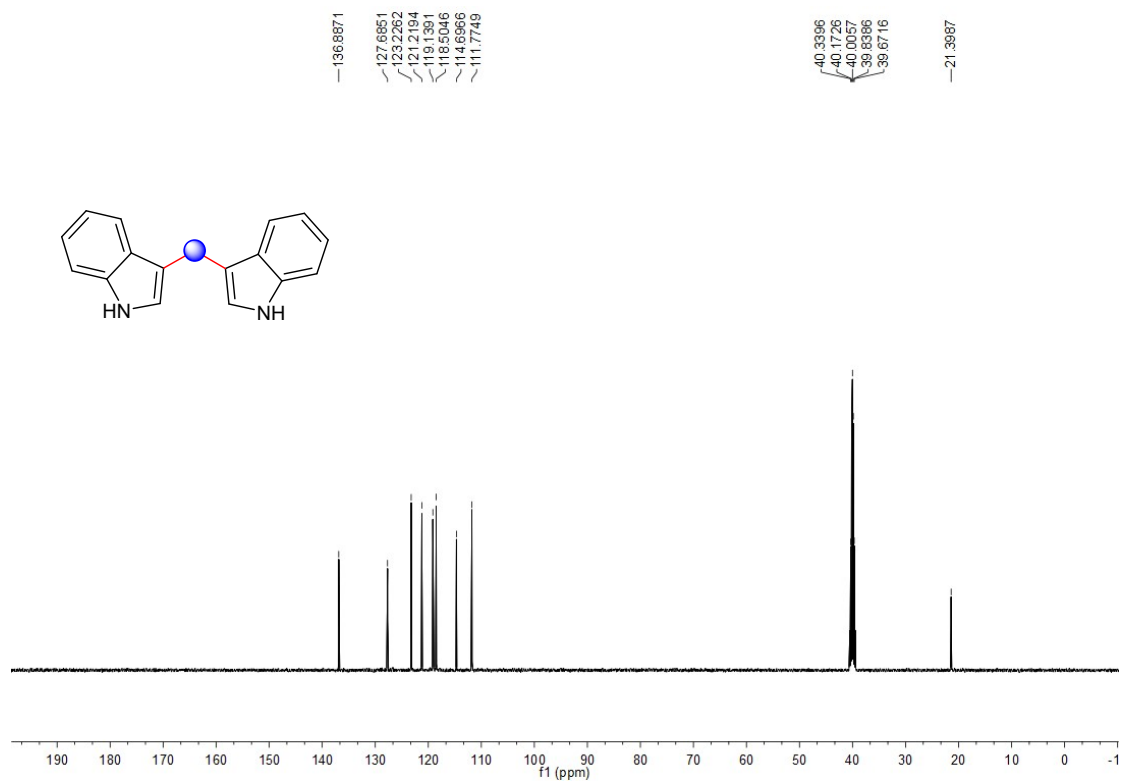

## 2c

<sup>1</sup>H NMR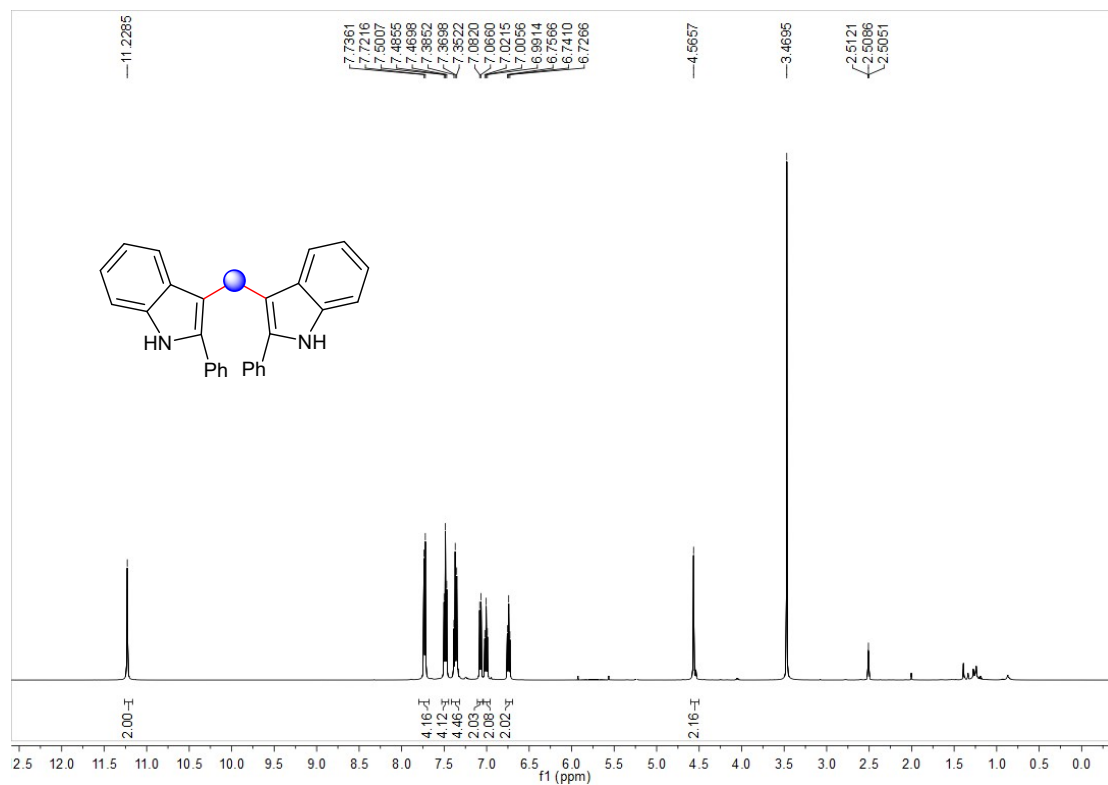<sup>13</sup>C NMR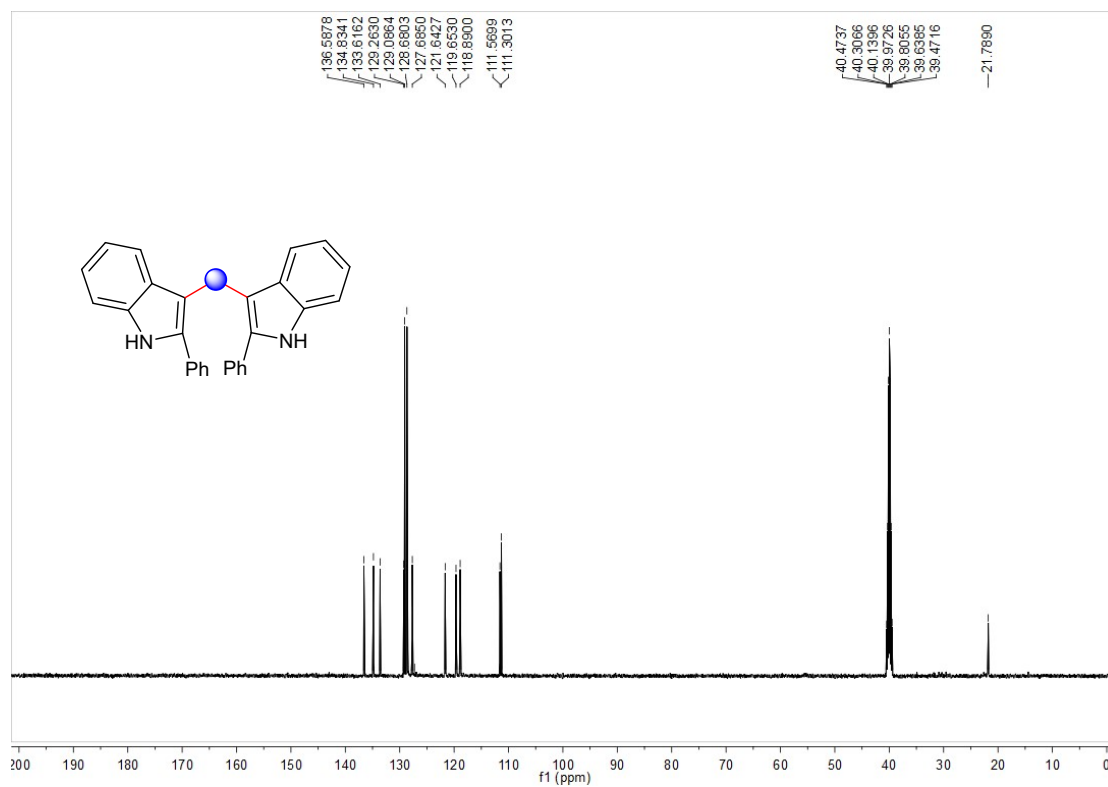

3c

<sup>1</sup>H NMR

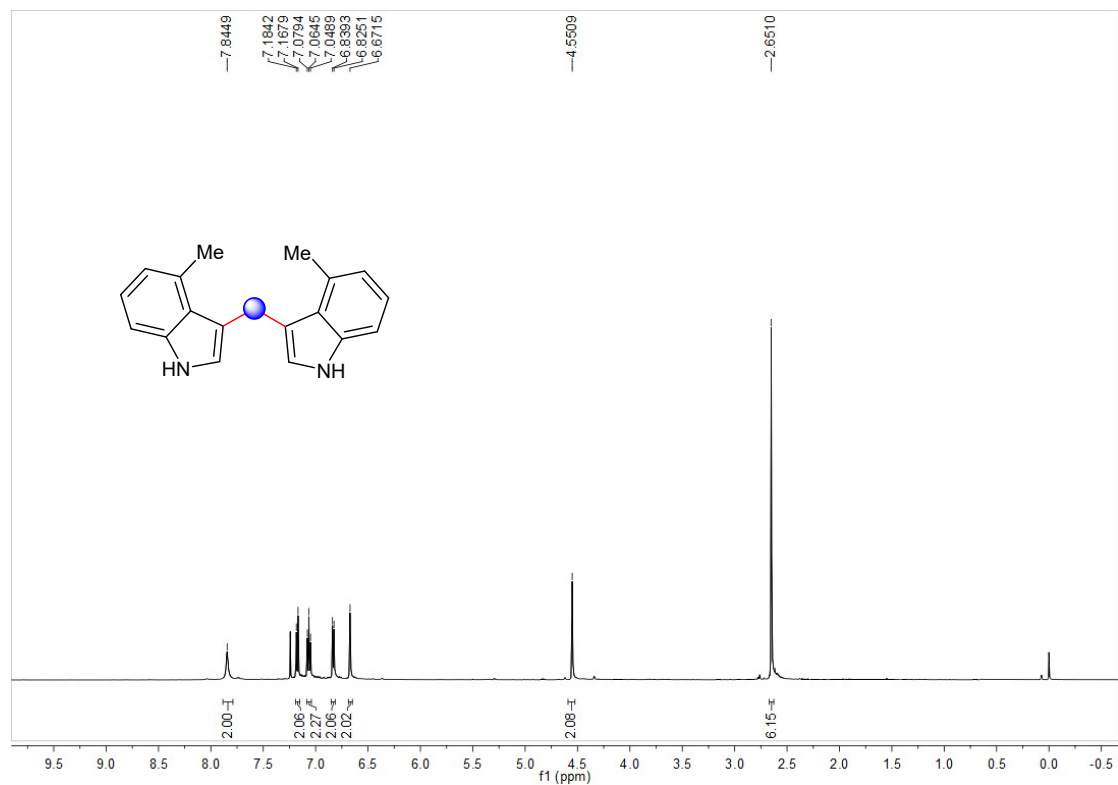

<sup>13</sup>C NMR

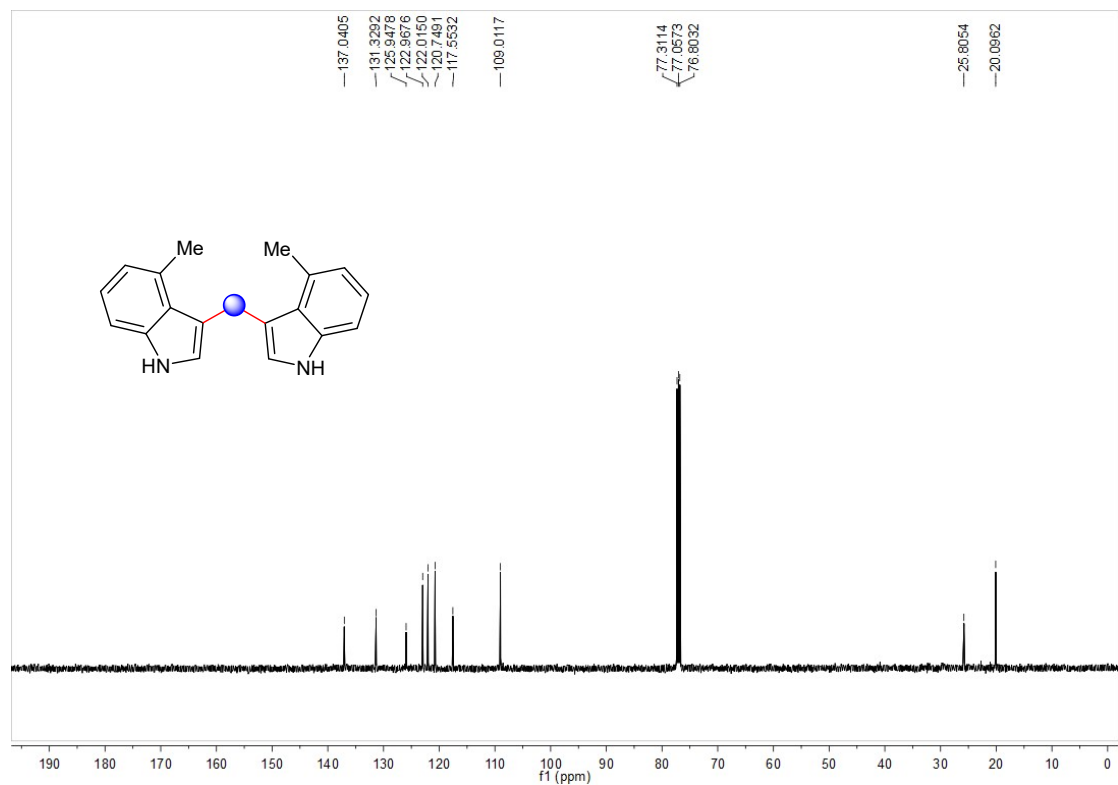

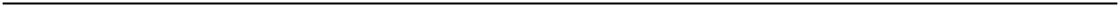



## 4c

<sup>1</sup>H NMR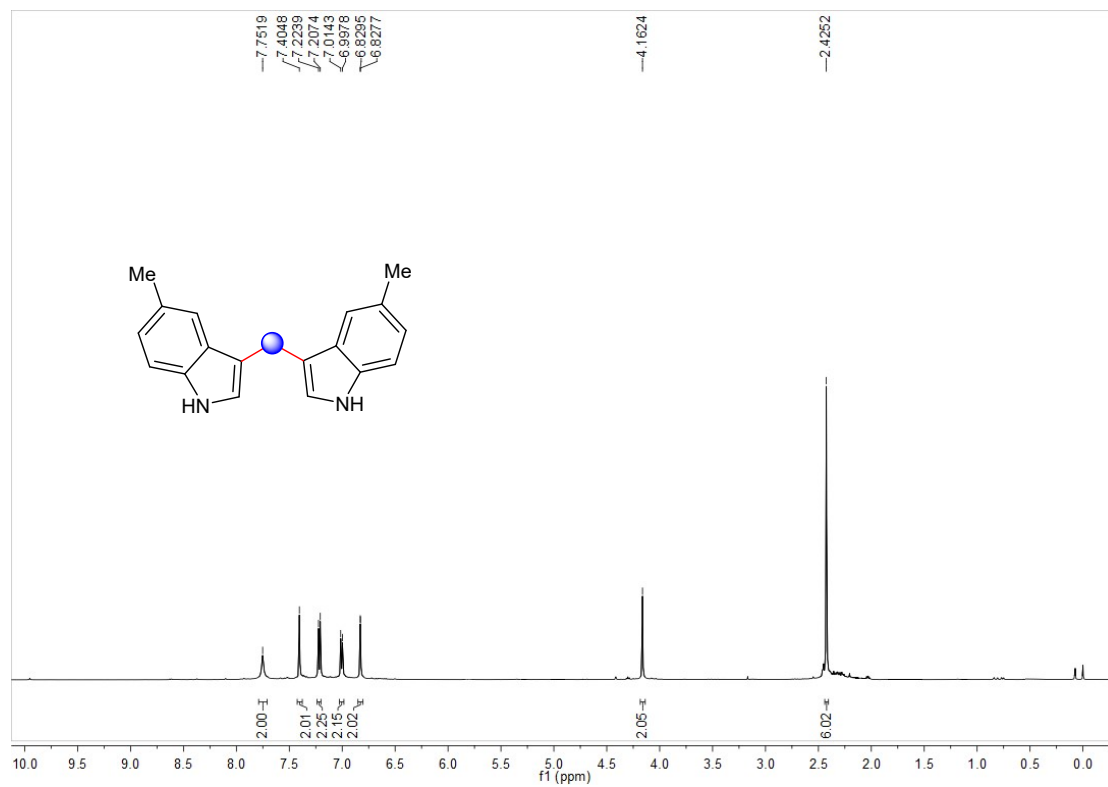<sup>13</sup>C NMR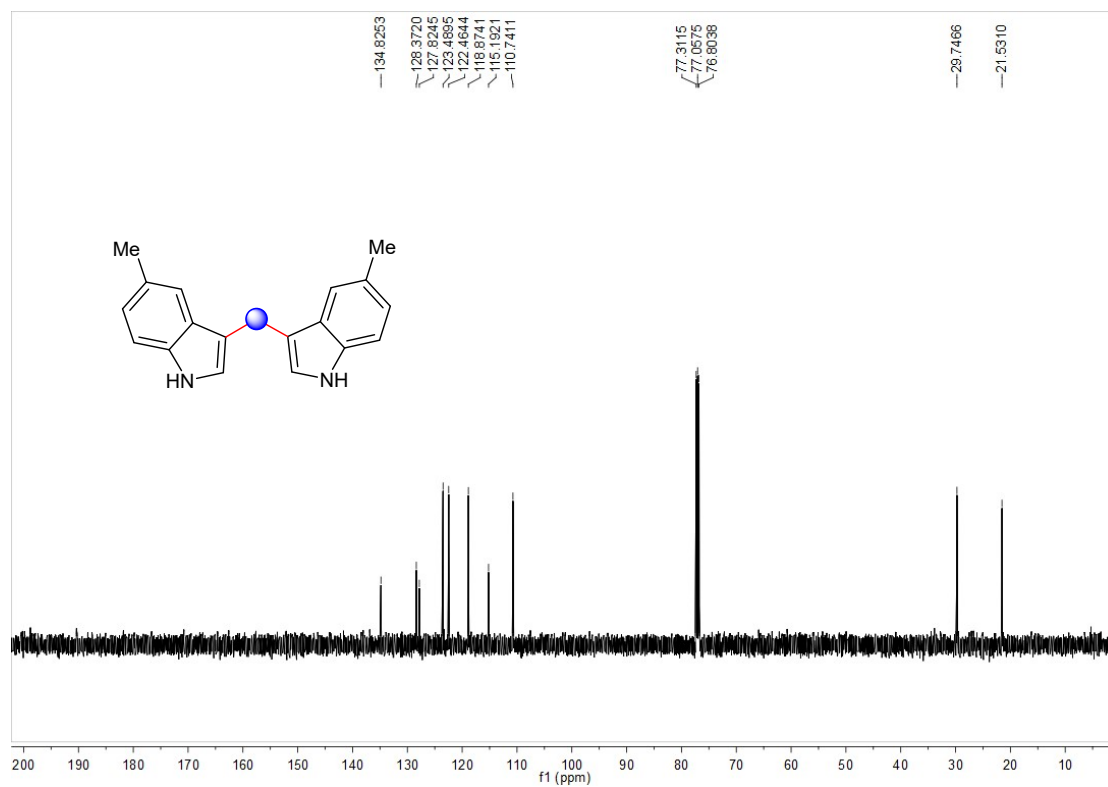

## 5c

<sup>1</sup>H NMR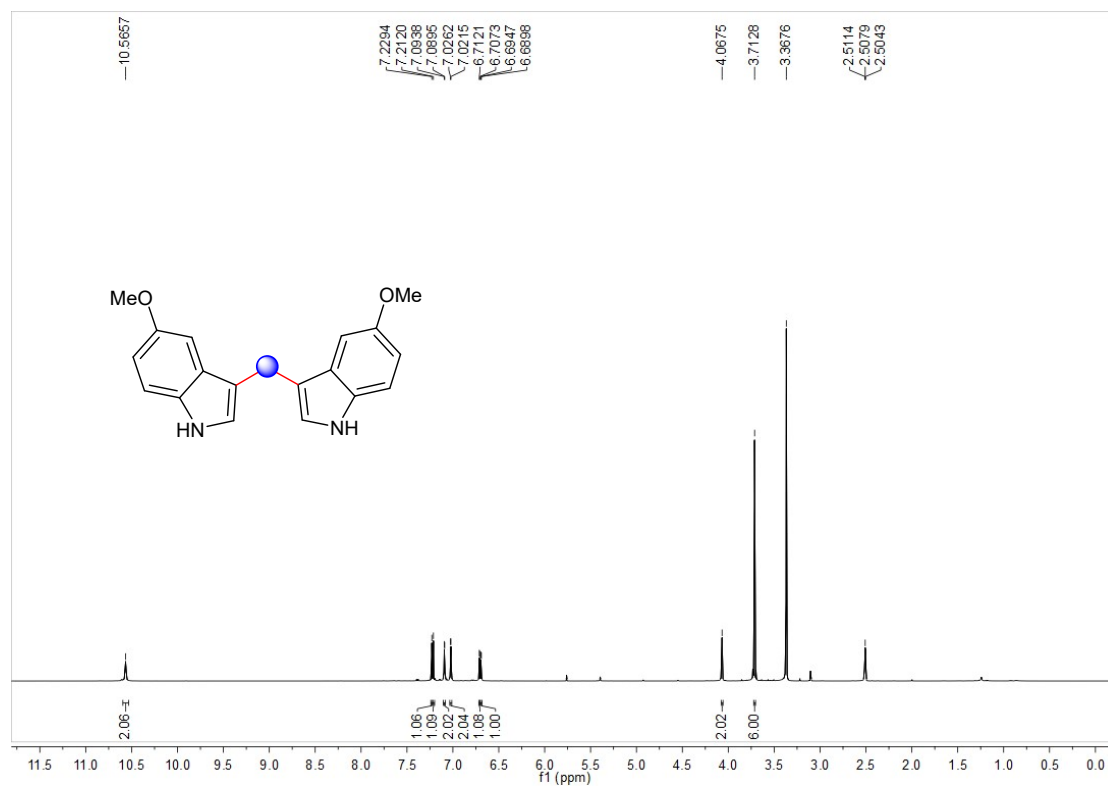<sup>13</sup>C NMR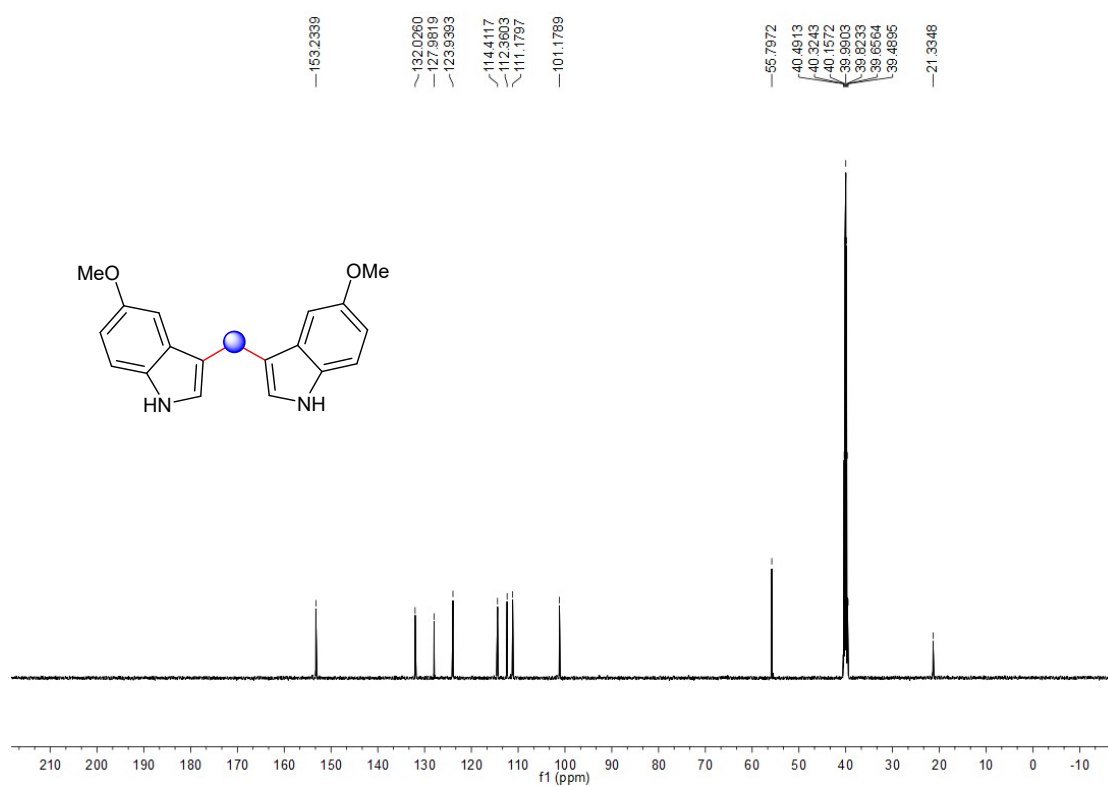

6c

<sup>1</sup>H NMR

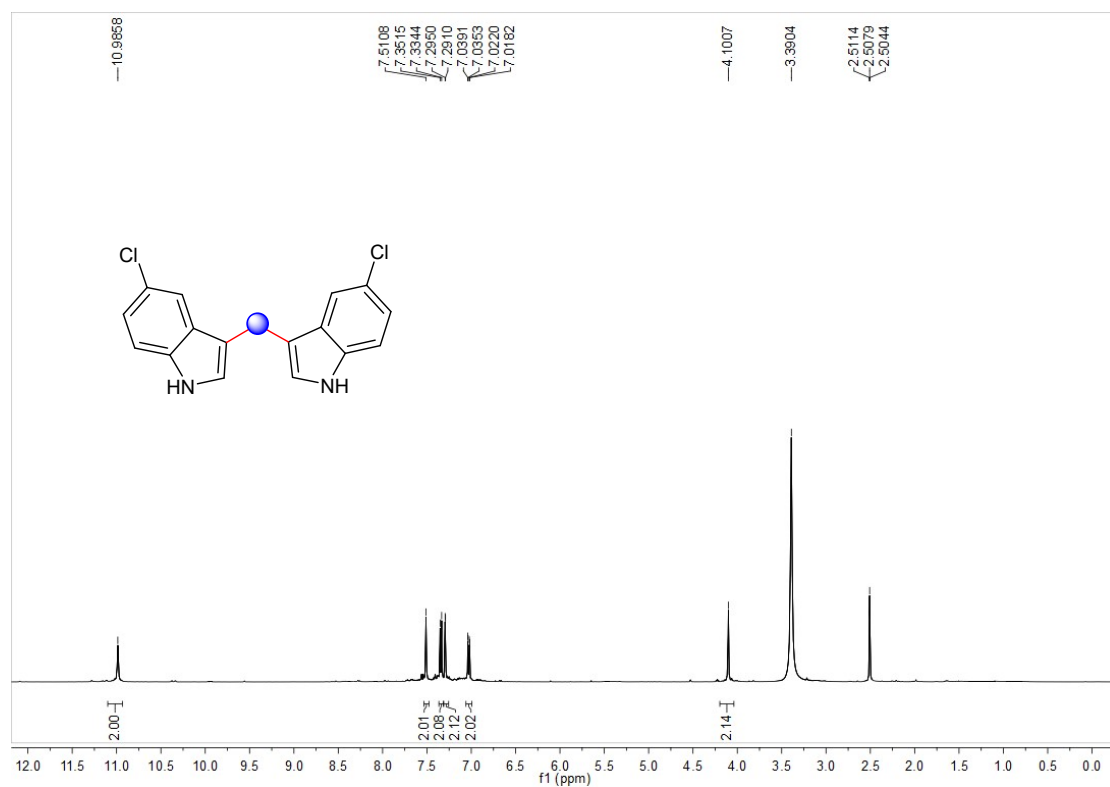

<sup>13</sup>C NMR

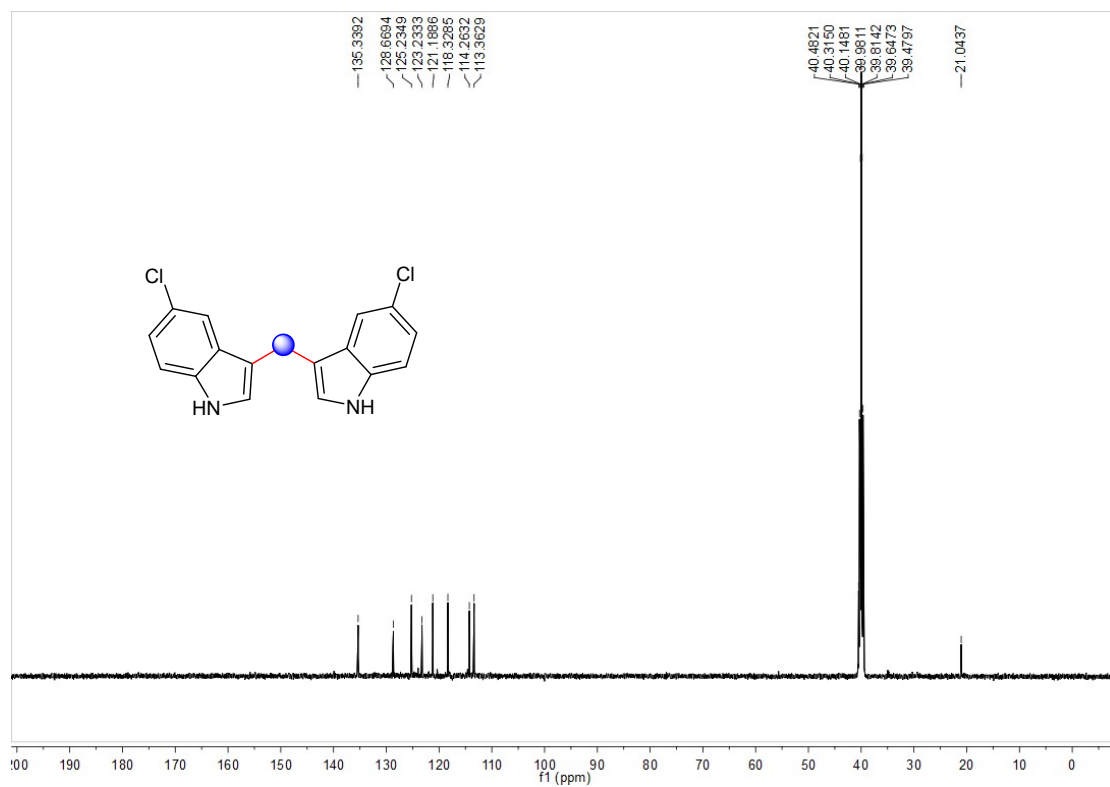

7c

<sup>1</sup>H NMR

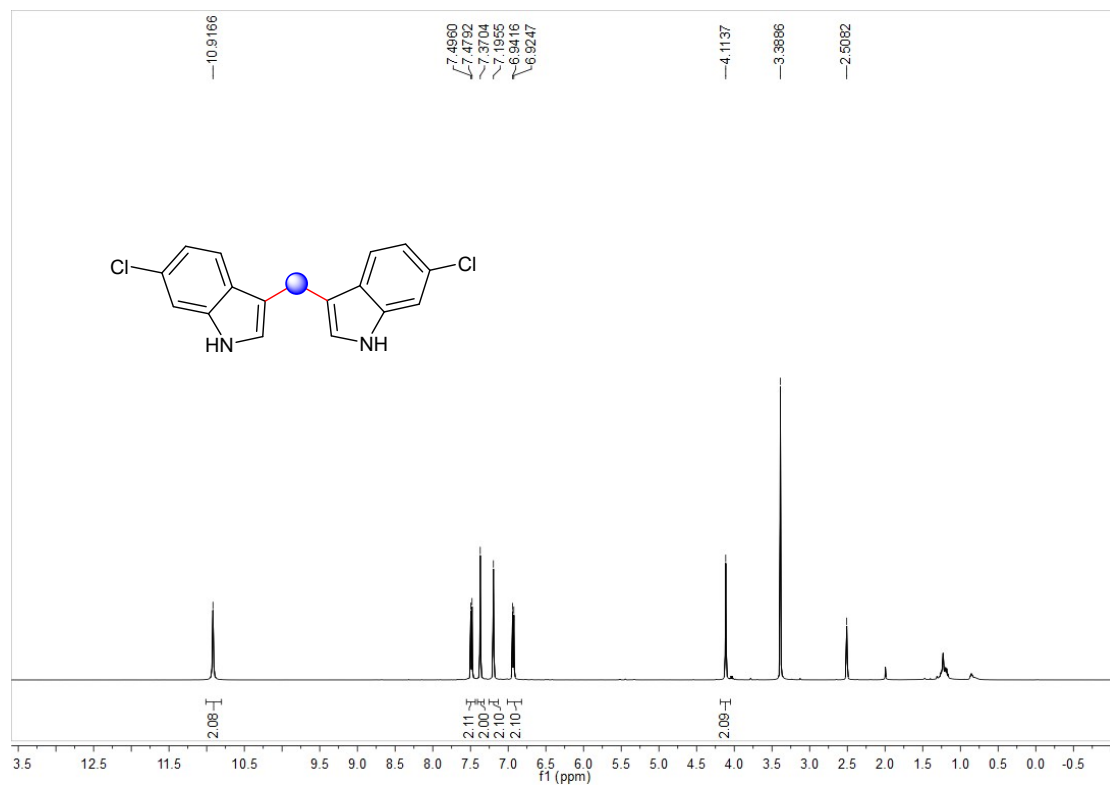

<sup>13</sup>C NMR

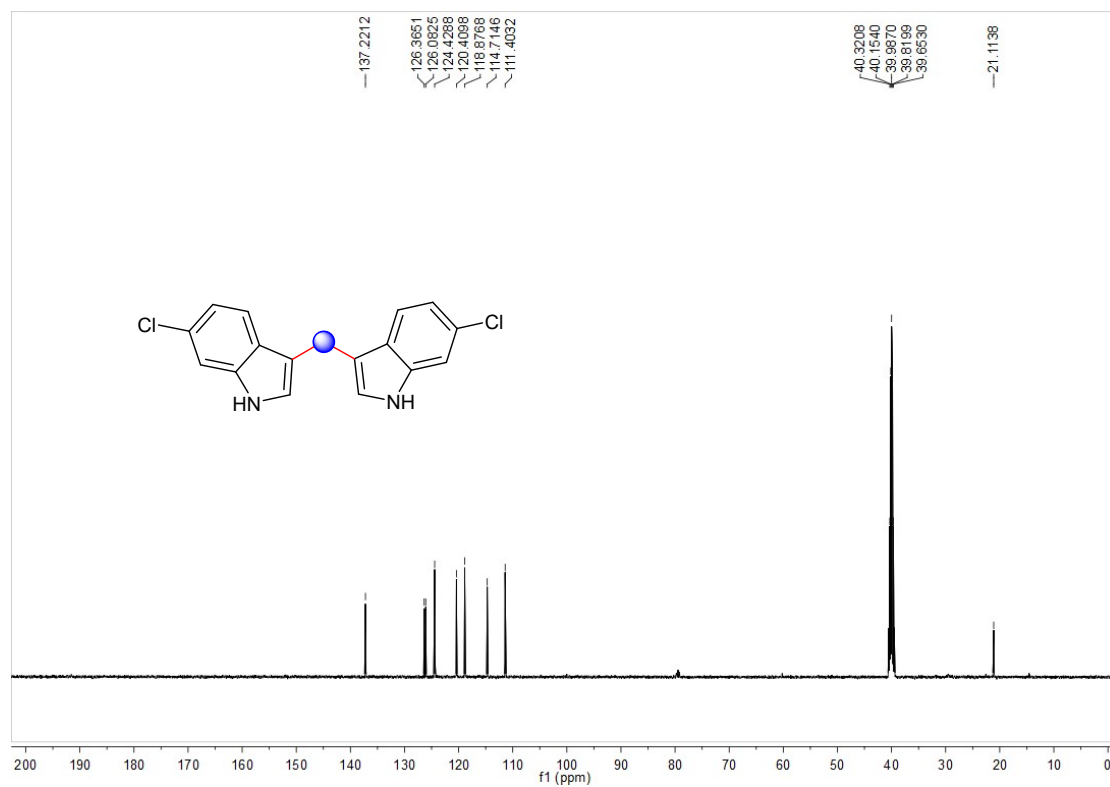

8c

<sup>1</sup>H NMR

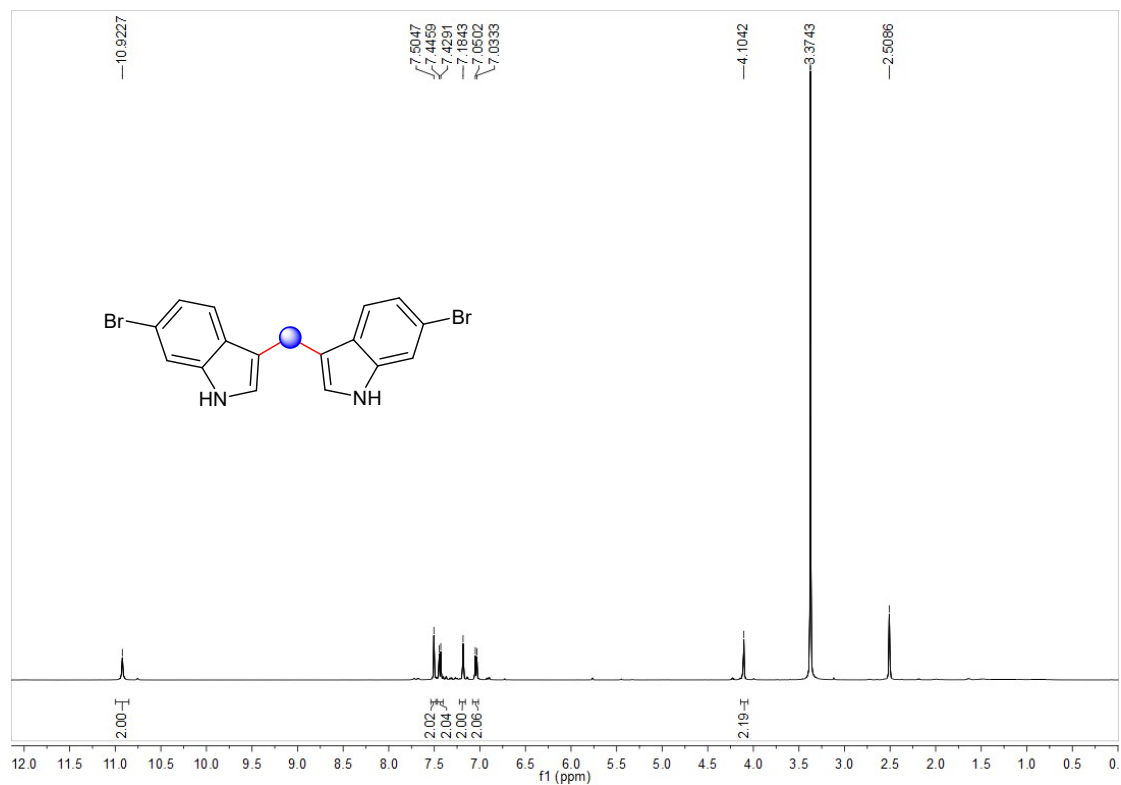

<sup>13</sup>C NMR

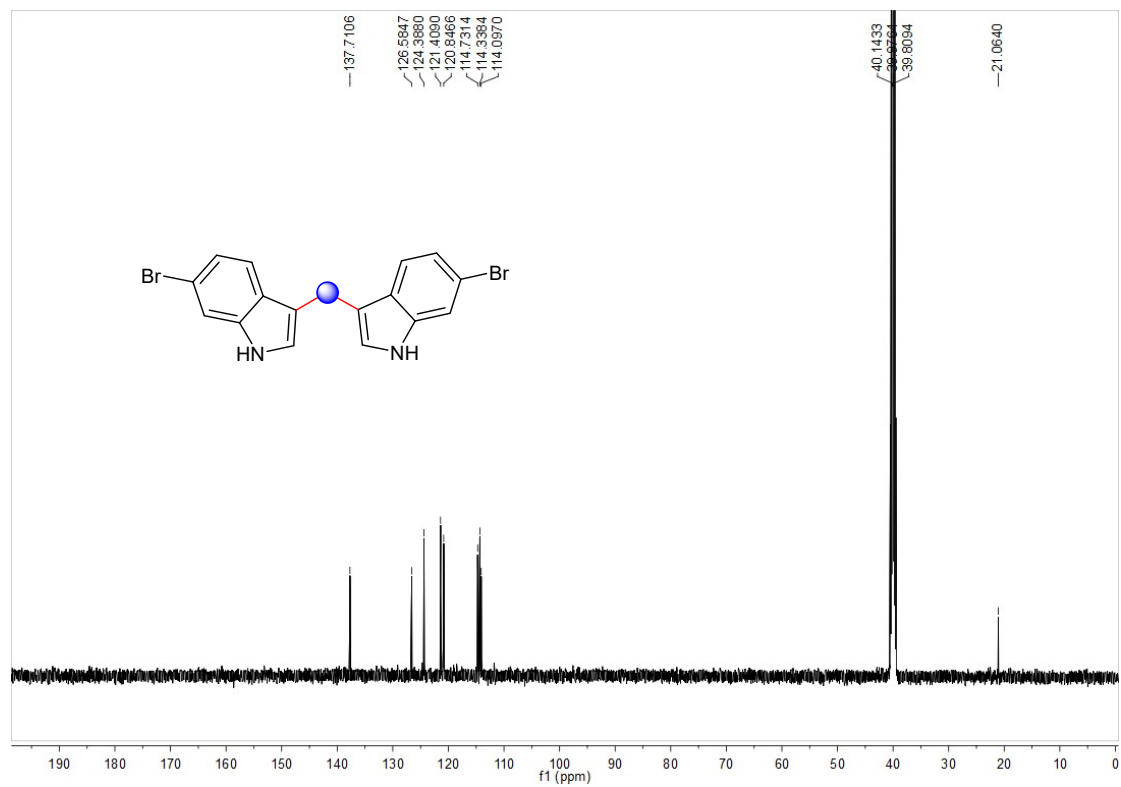

9c

<sup>1</sup>H NMR

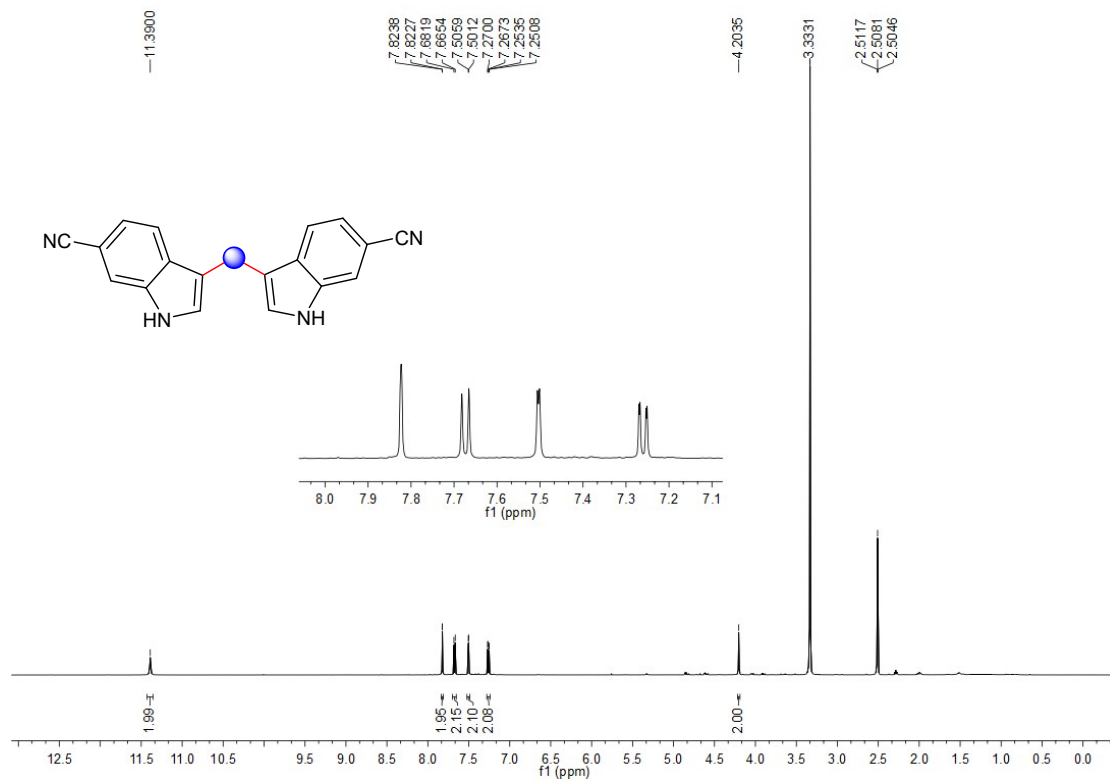

<sup>13</sup>C NMR

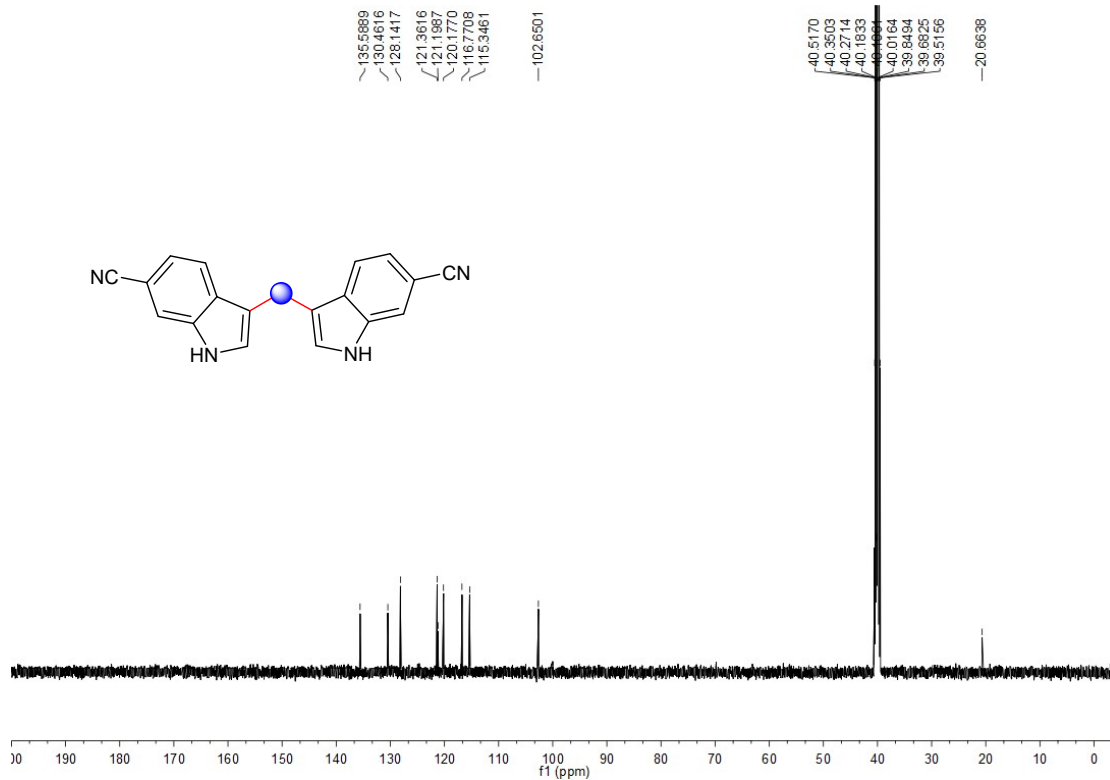



10c

<sup>1</sup>H NMR

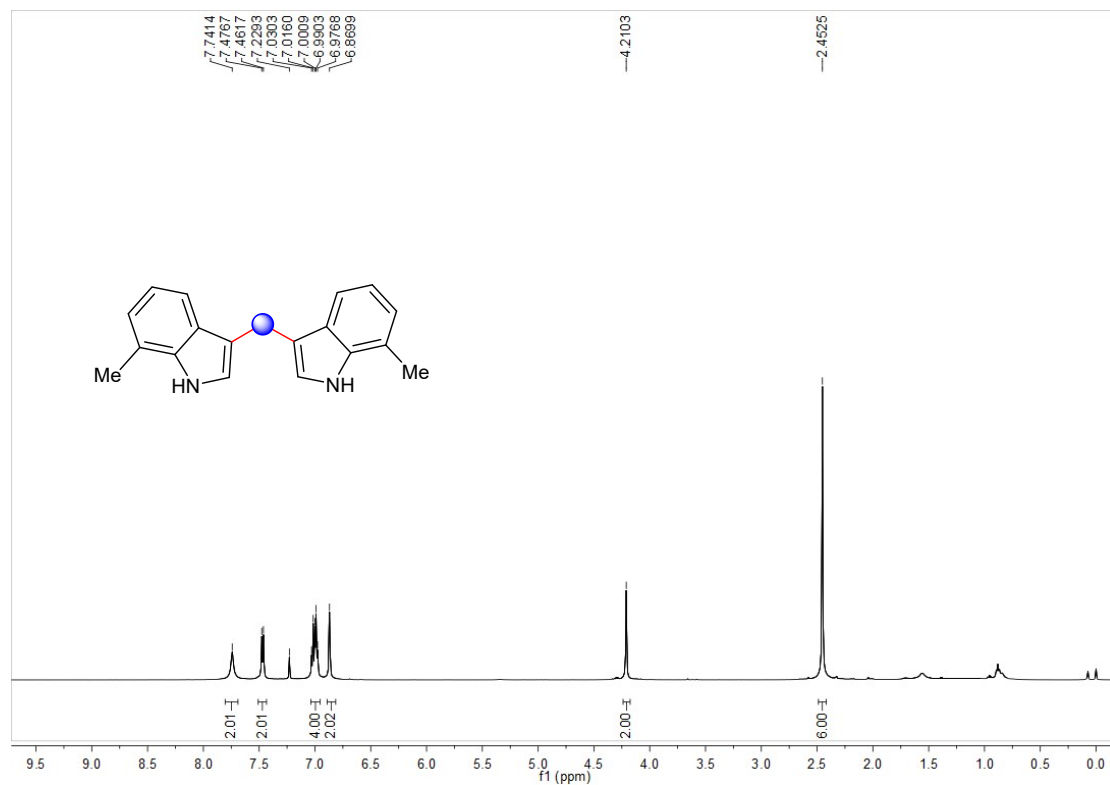

<sup>13</sup>C NMR

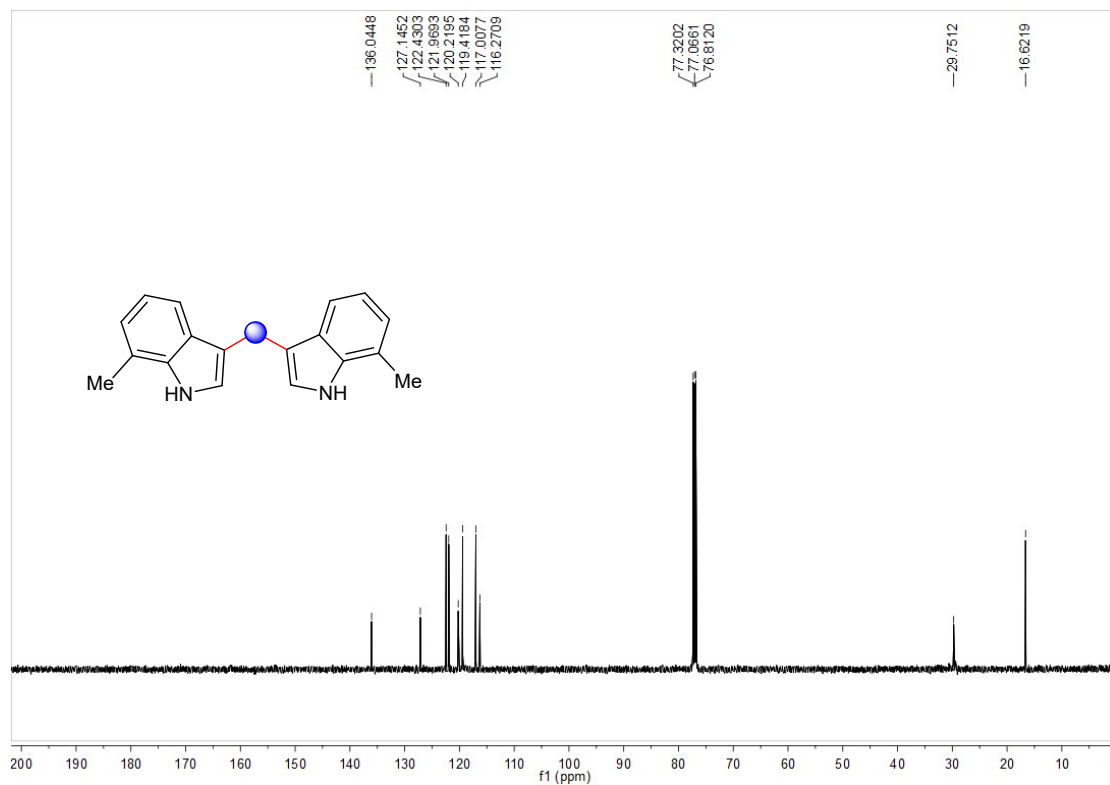





# 11c

## <sup>1</sup>H NMR

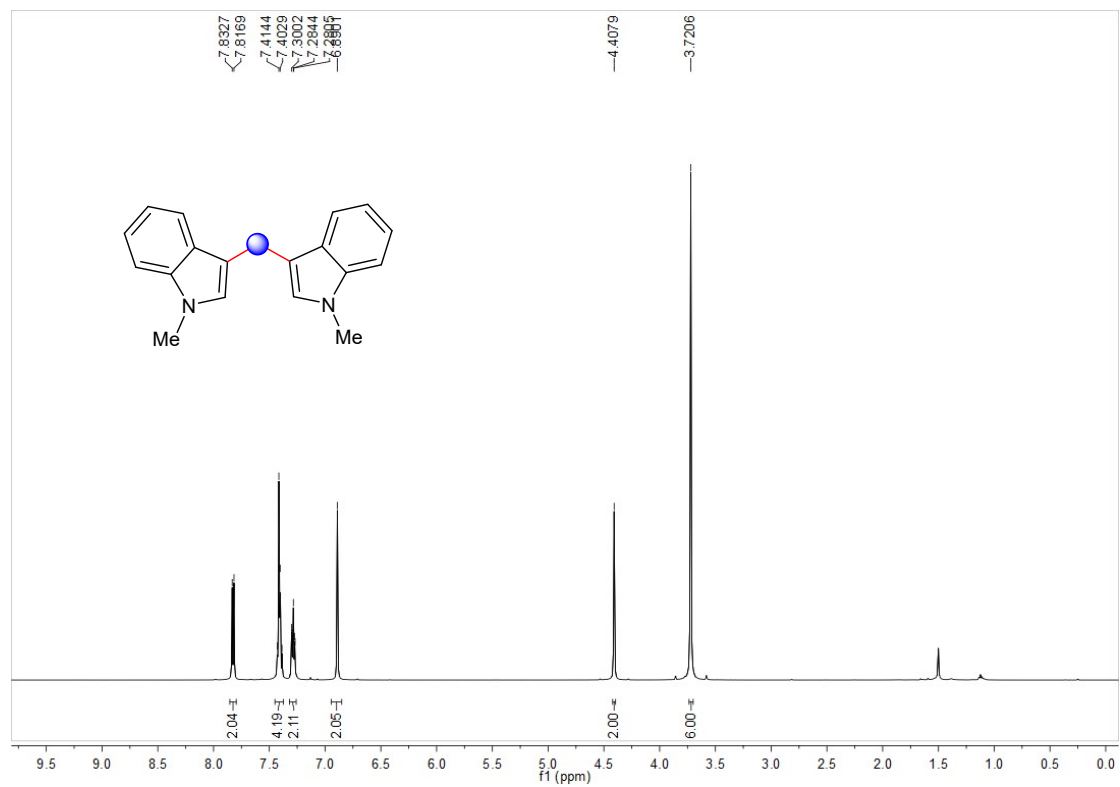

## <sup>13</sup>C NMR

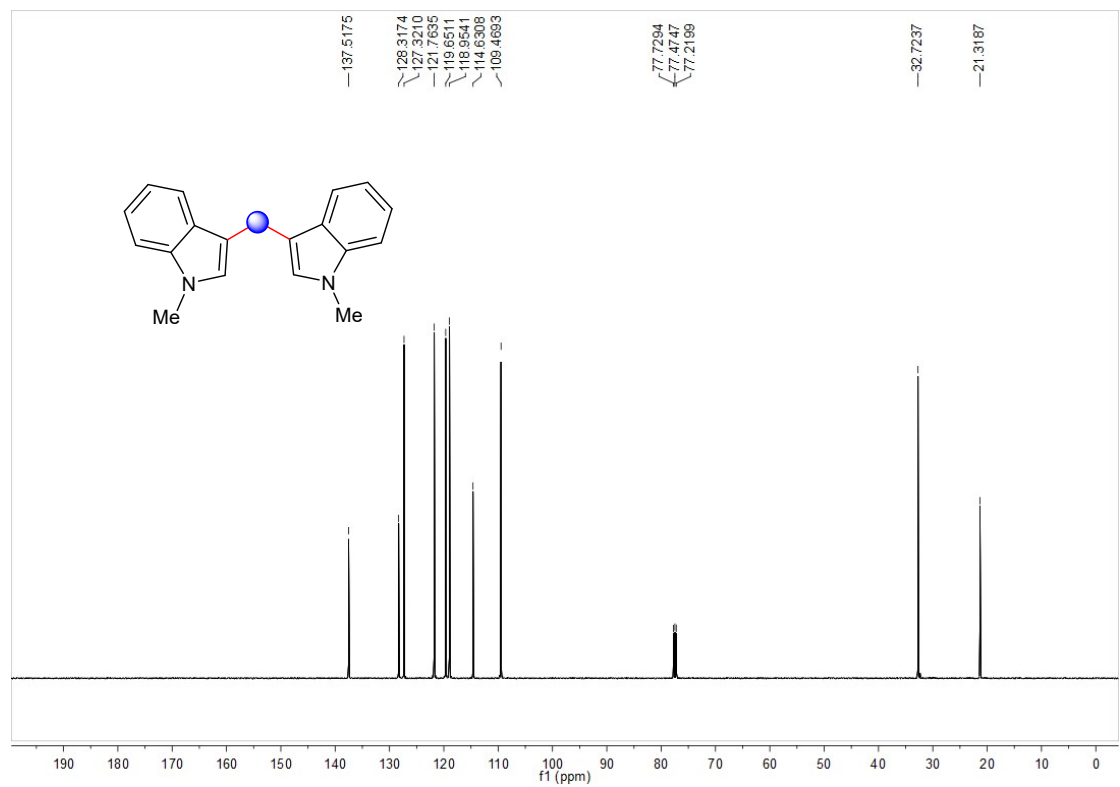

# 12c

## <sup>1</sup>H NMR

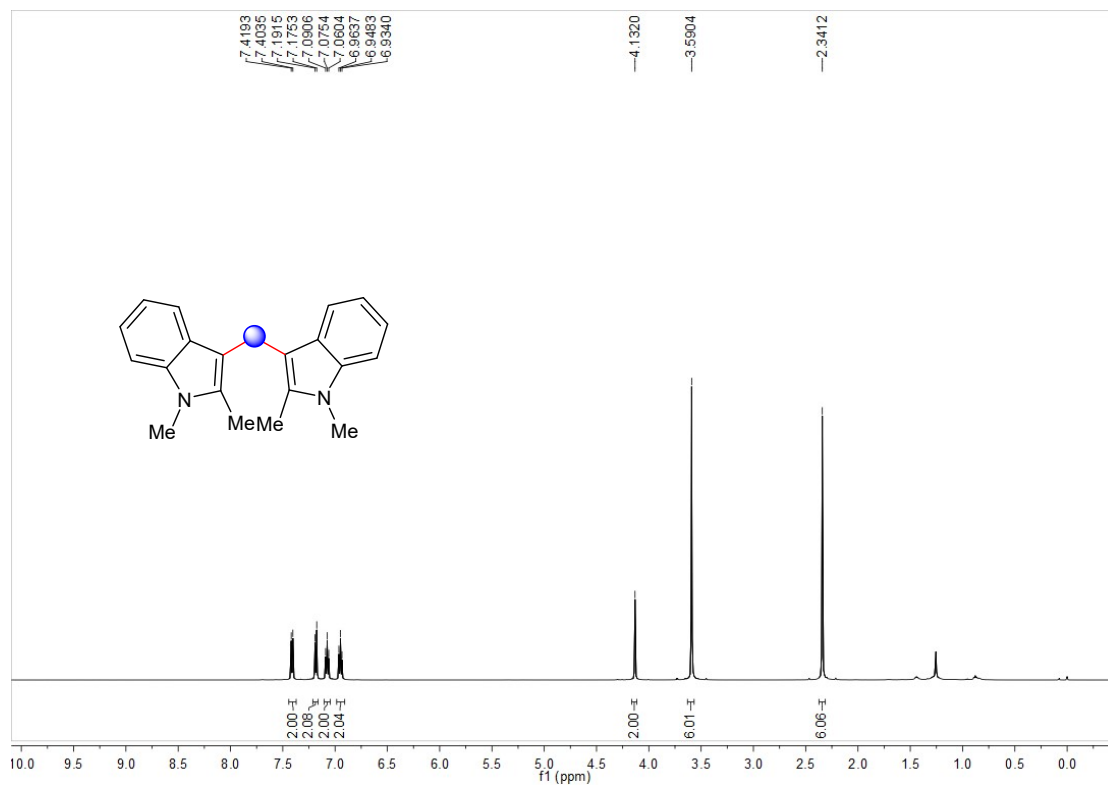

## <sup>13</sup>C NMR

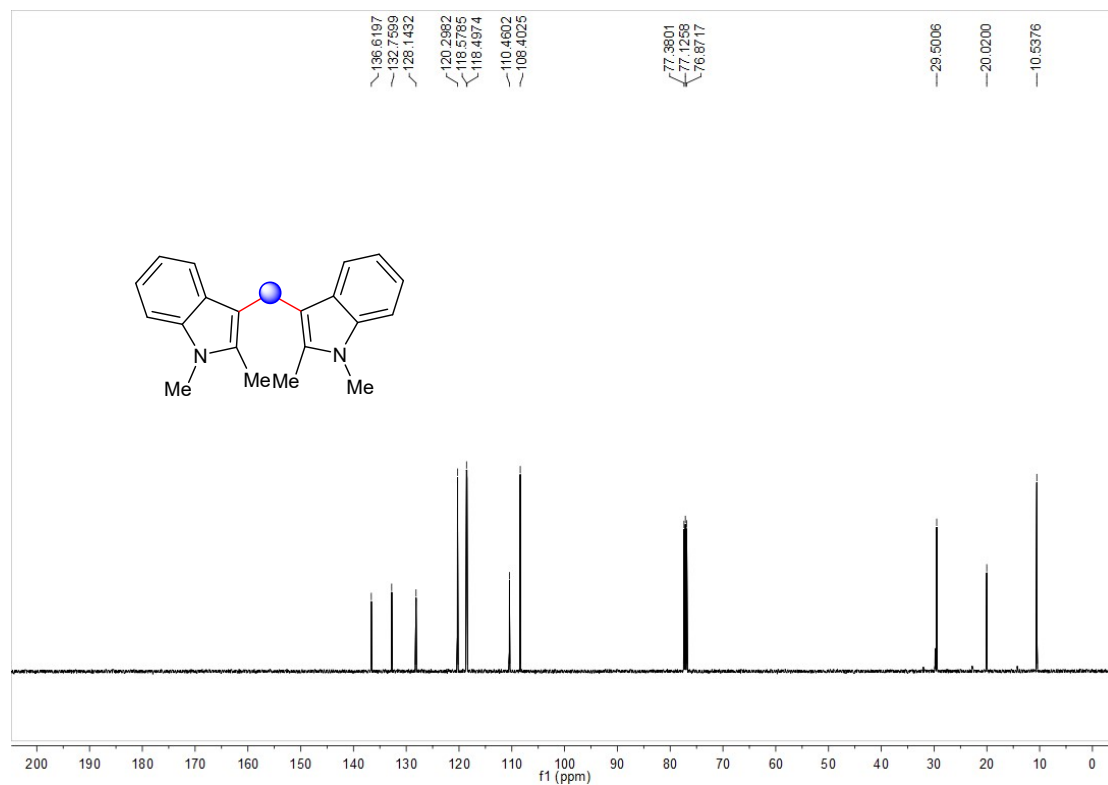



# 13c

## <sup>1</sup>H NMR

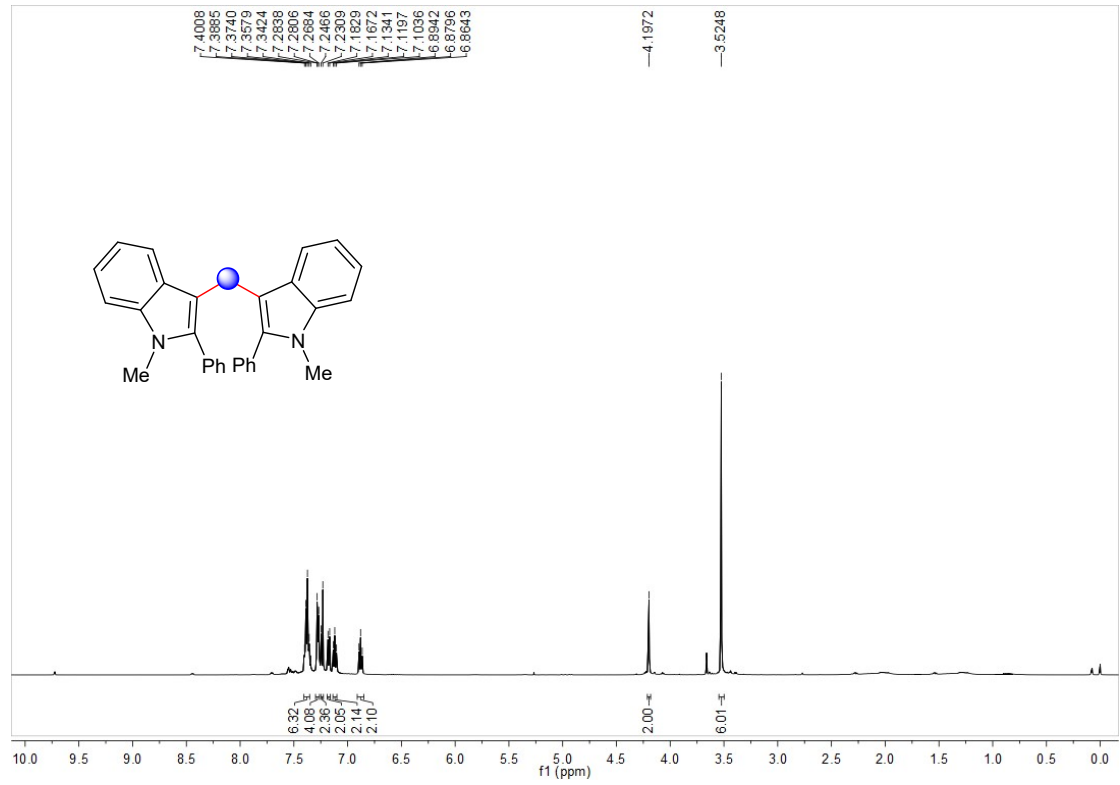

## <sup>13</sup>C NMR

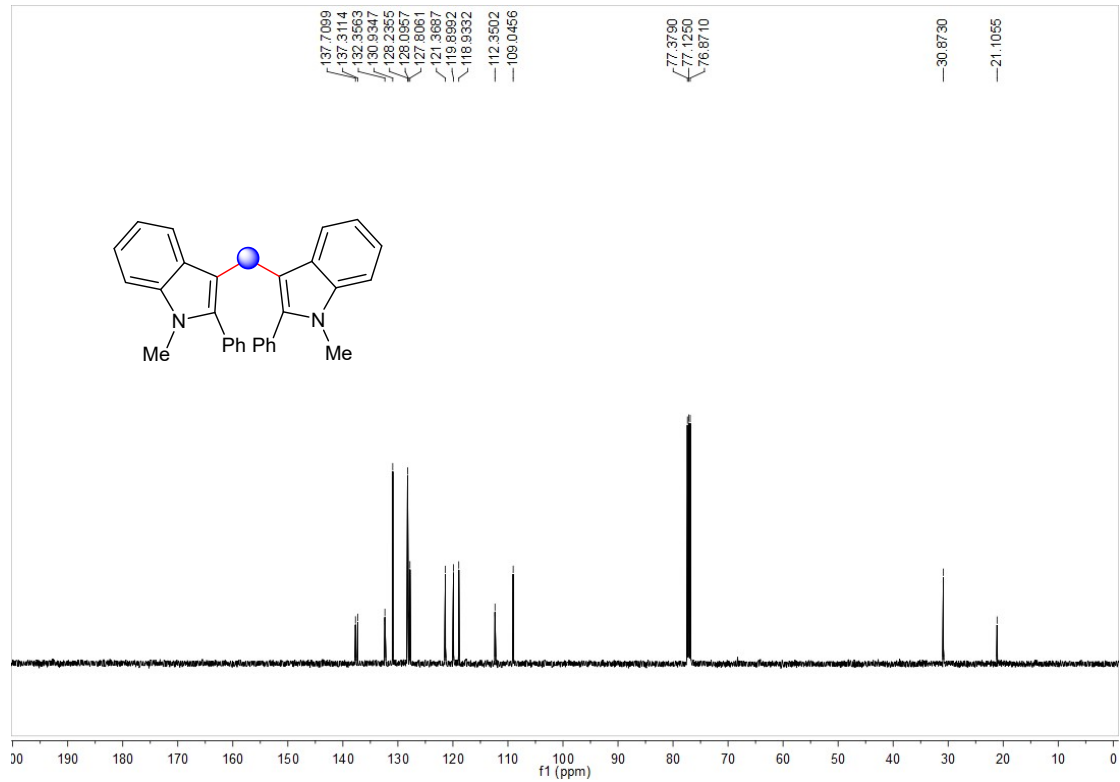



# 14c

## <sup>1</sup>H NMR

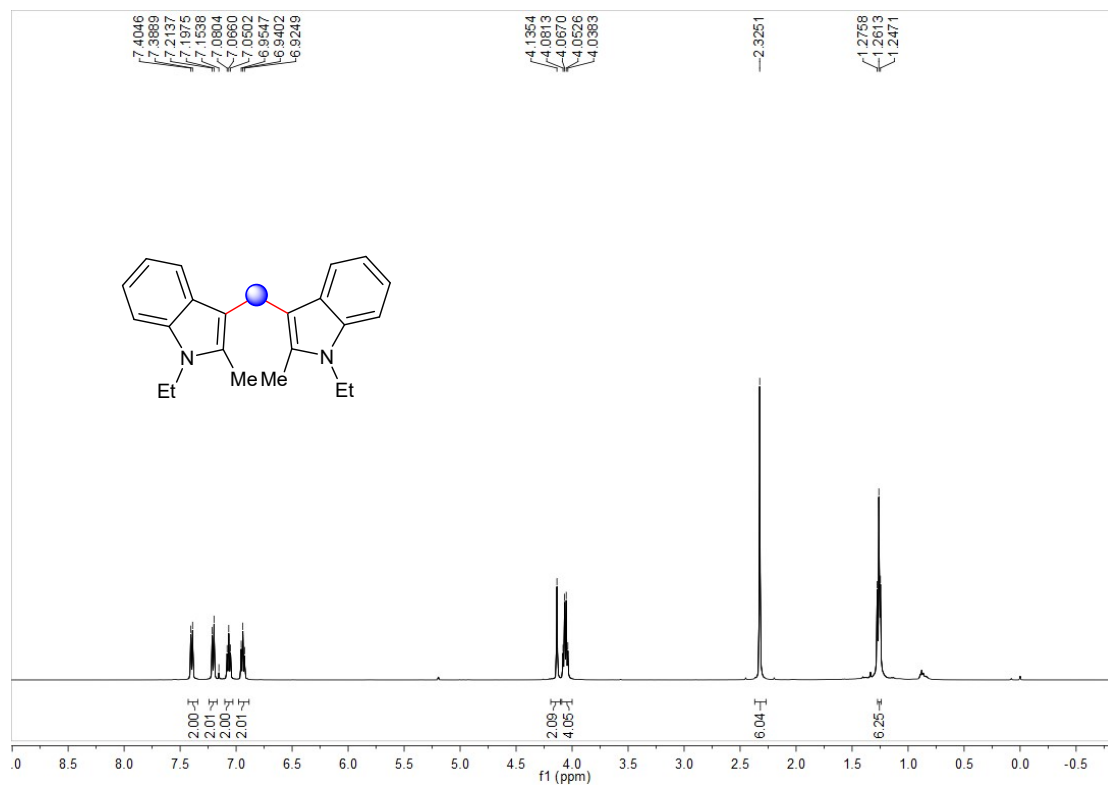

## <sup>13</sup>C NMR

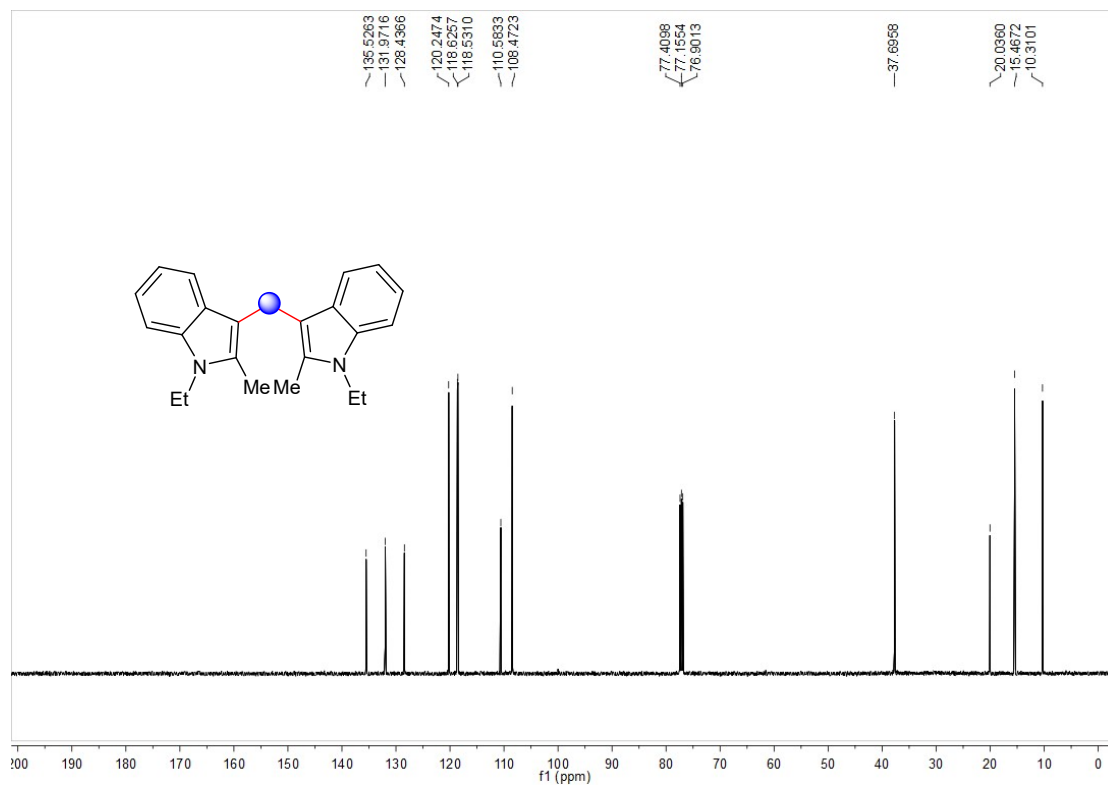





15c

<sup>1</sup>H NMR

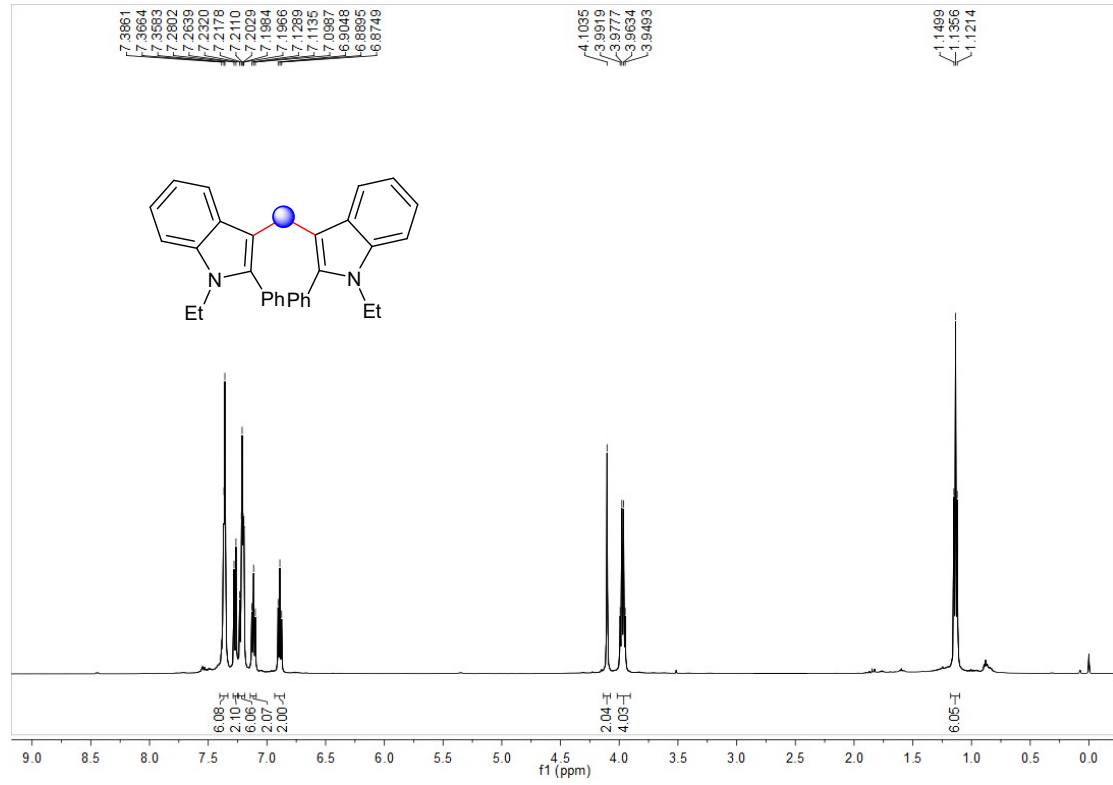

<sup>13</sup>C NMR

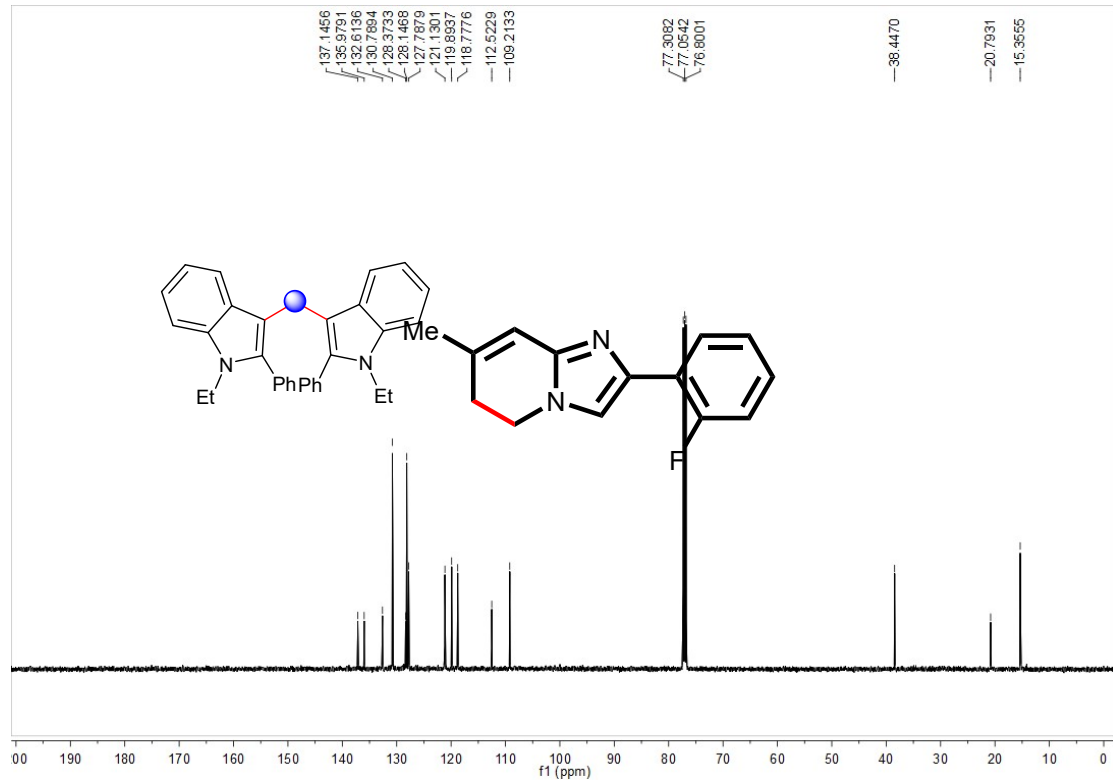

16c

<sup>1</sup>H NMR

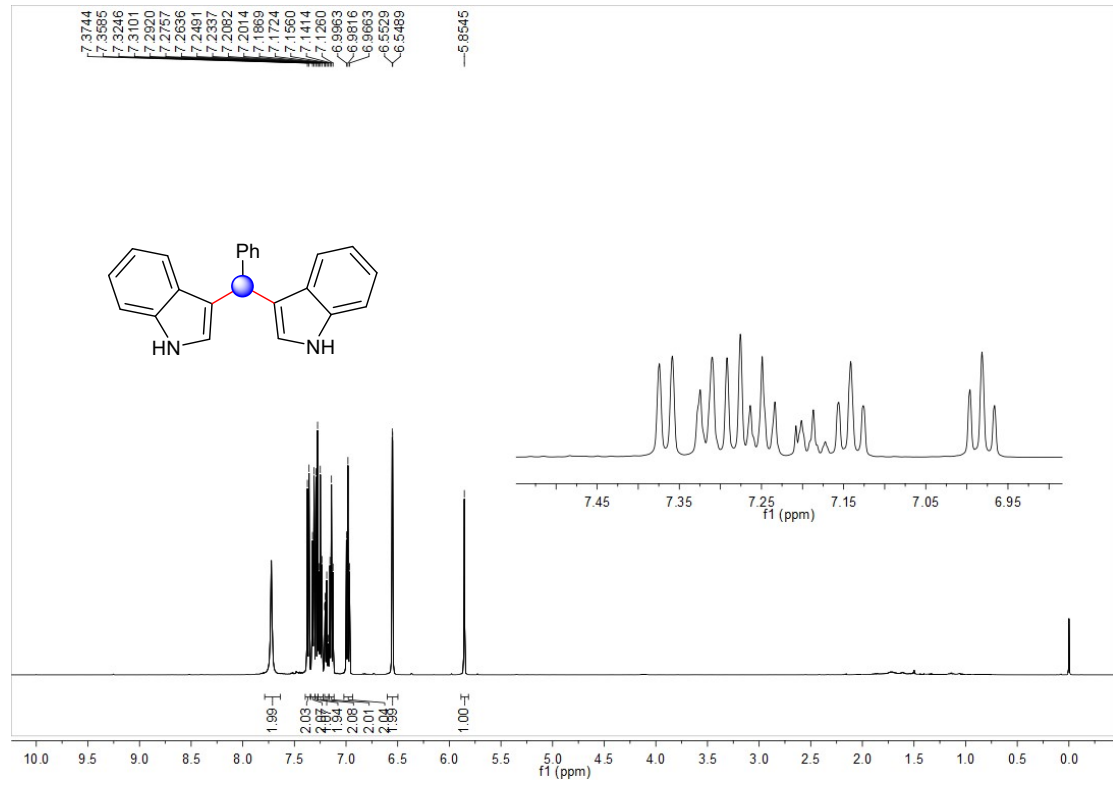

<sup>13</sup>C NMR

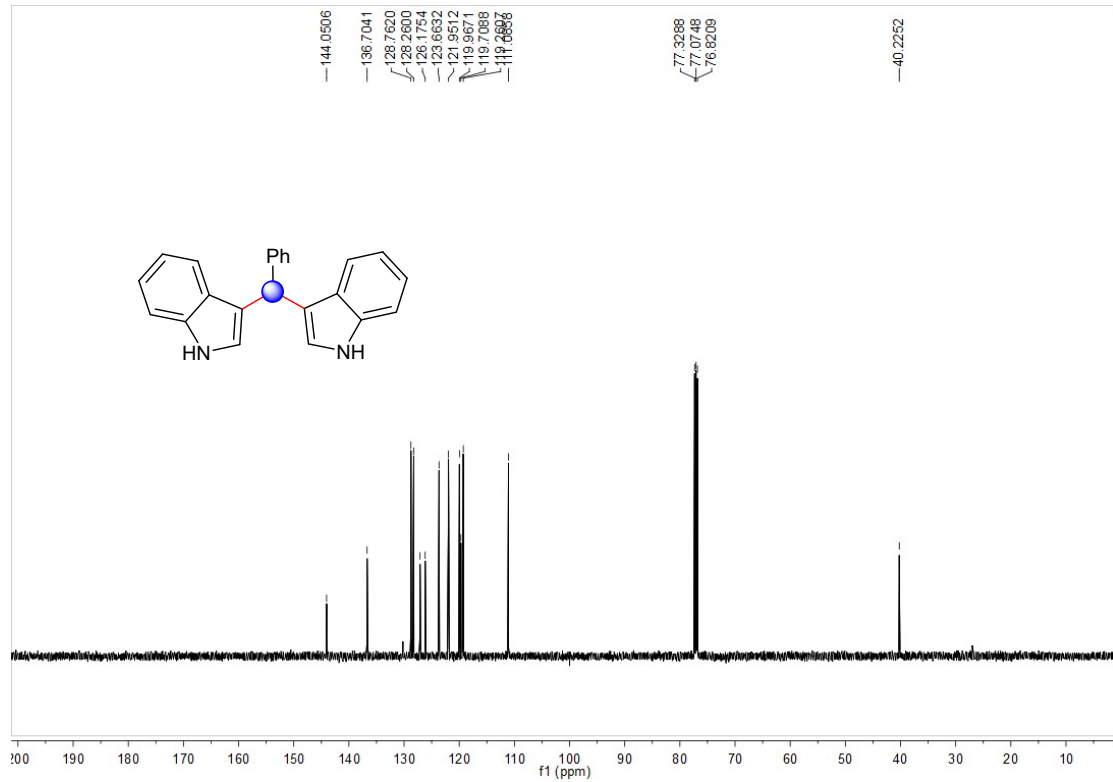



## 17c

<sup>1</sup>H NMR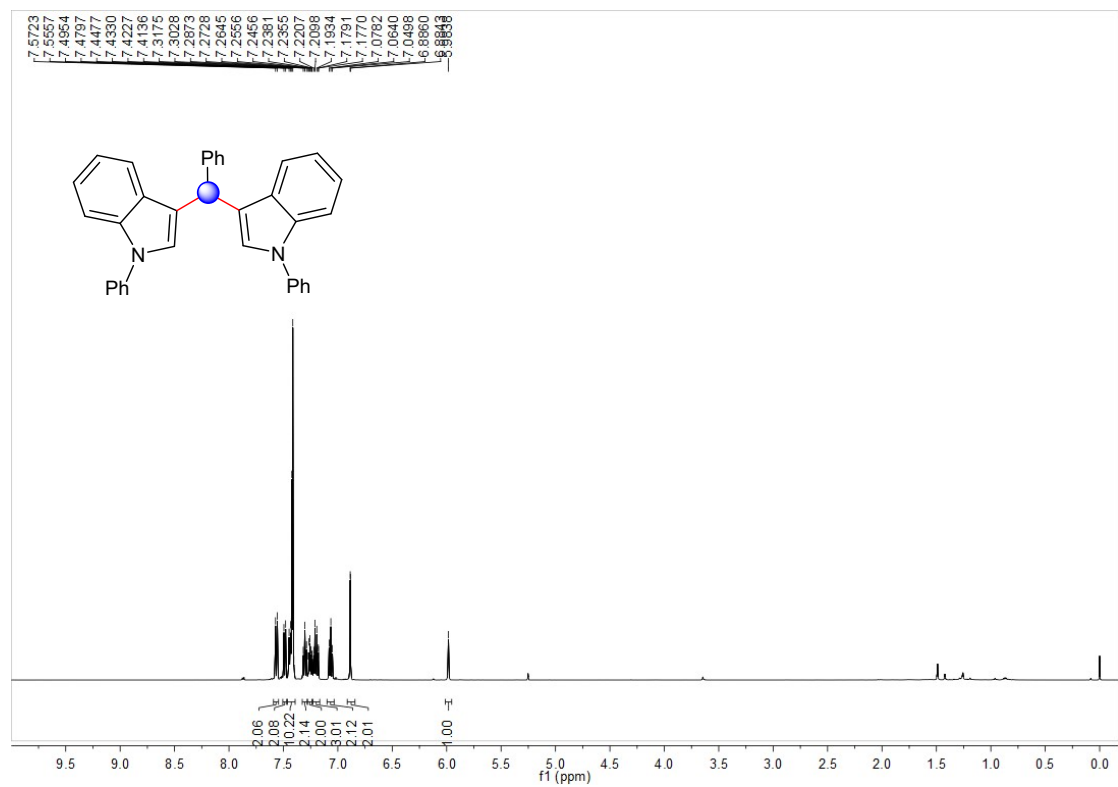<sup>13</sup>C NMR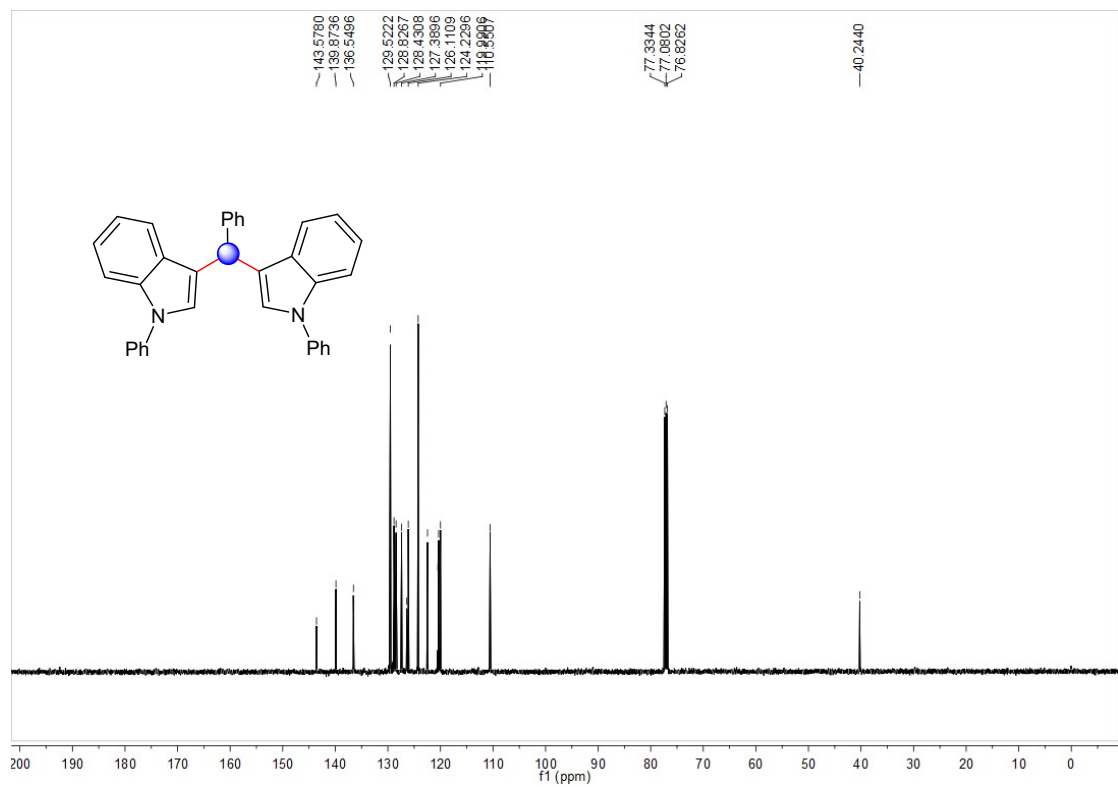



18c

<sup>1</sup>H NMR

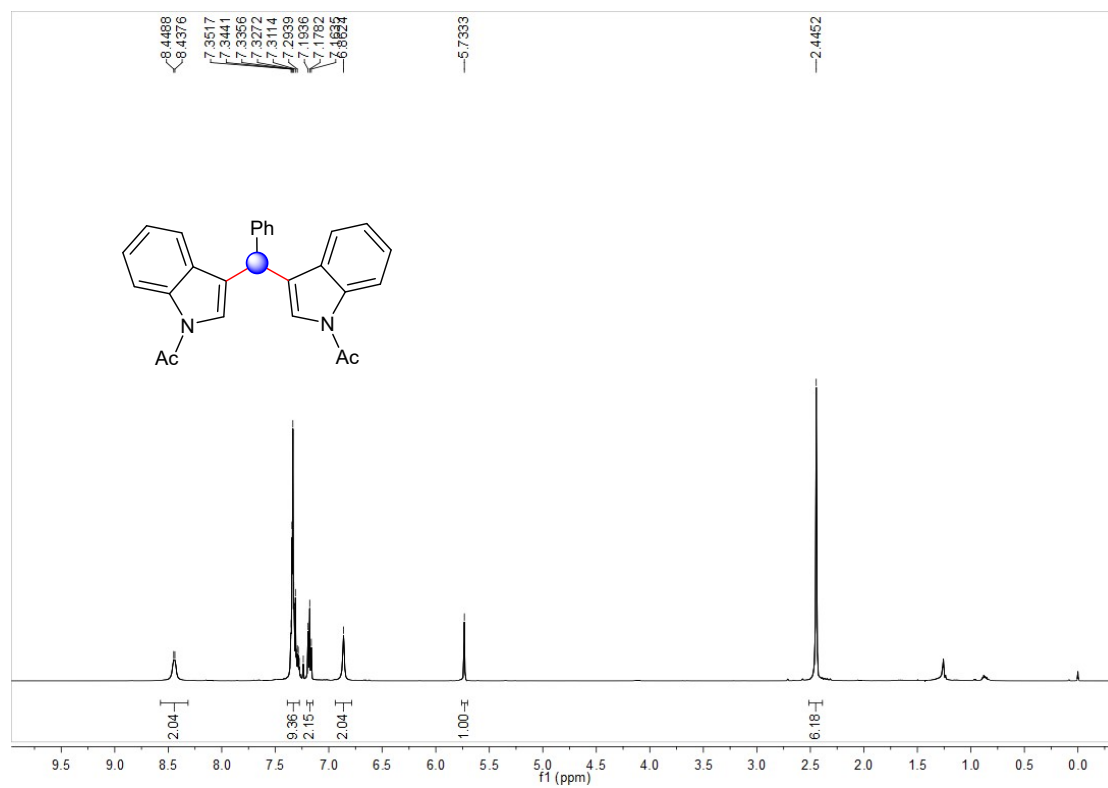

<sup>13</sup>C NMR

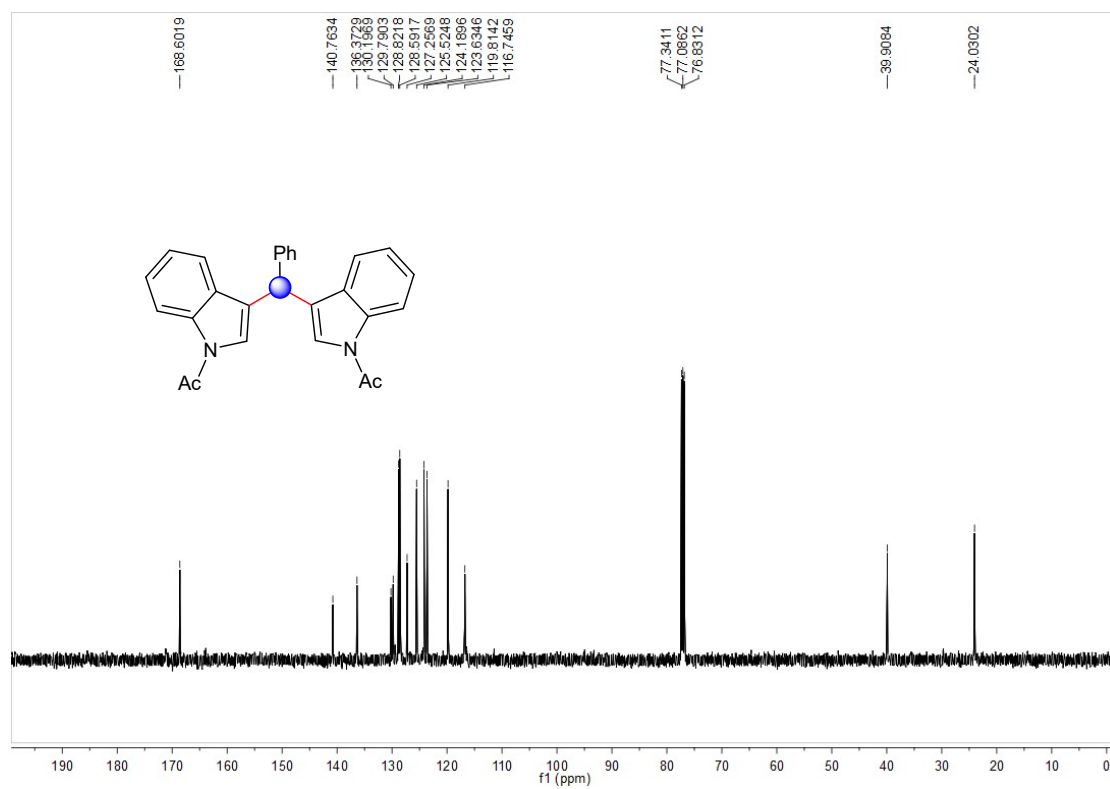

# 21c

## <sup>1</sup>H NMR

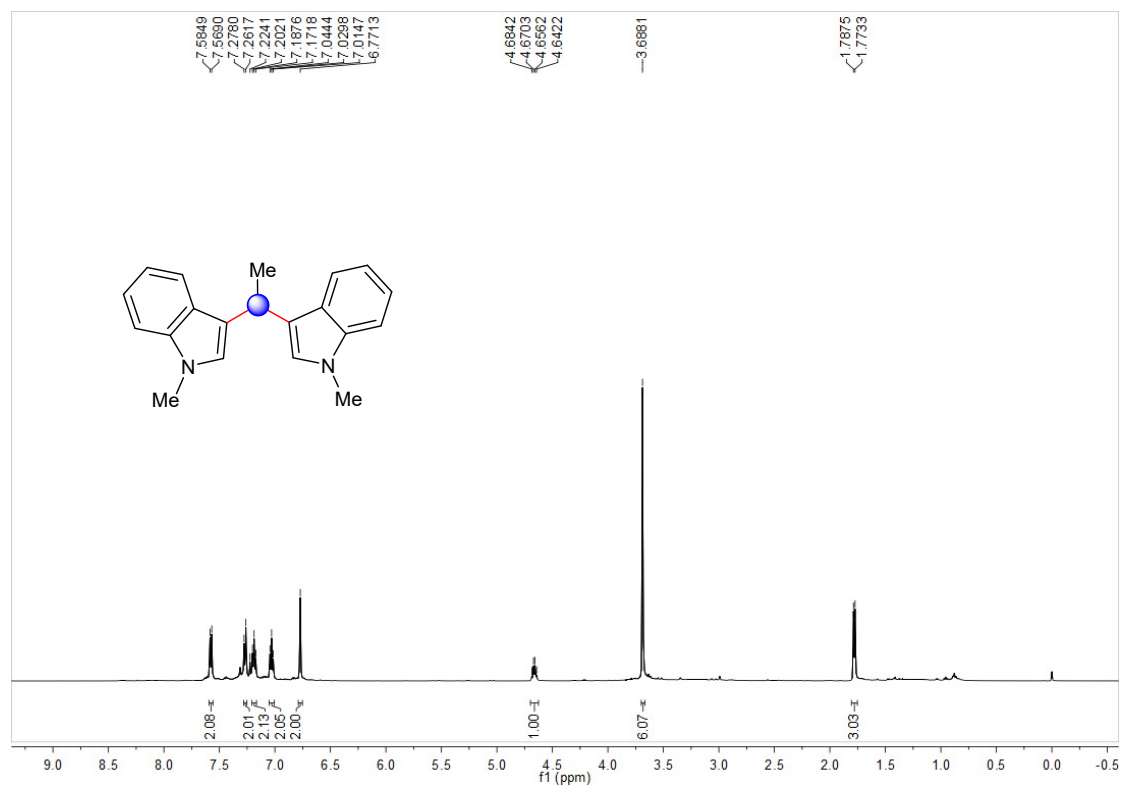

## <sup>13</sup>C NMR

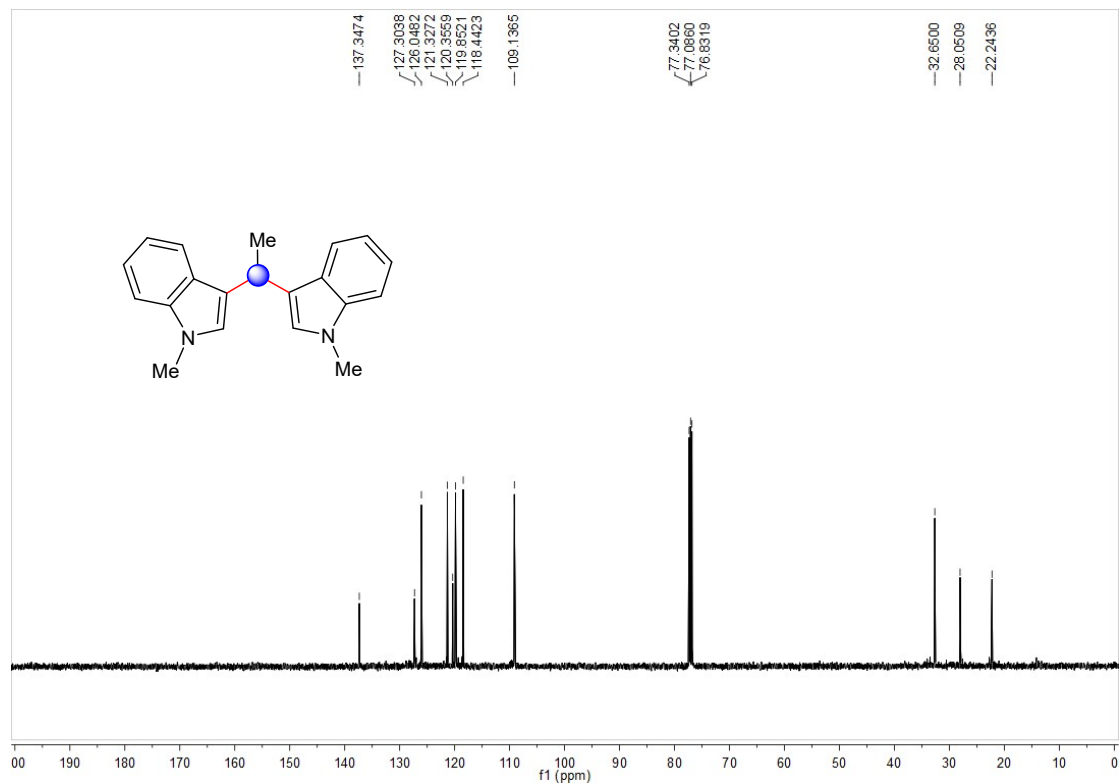



22c

<sup>1</sup>H NMR

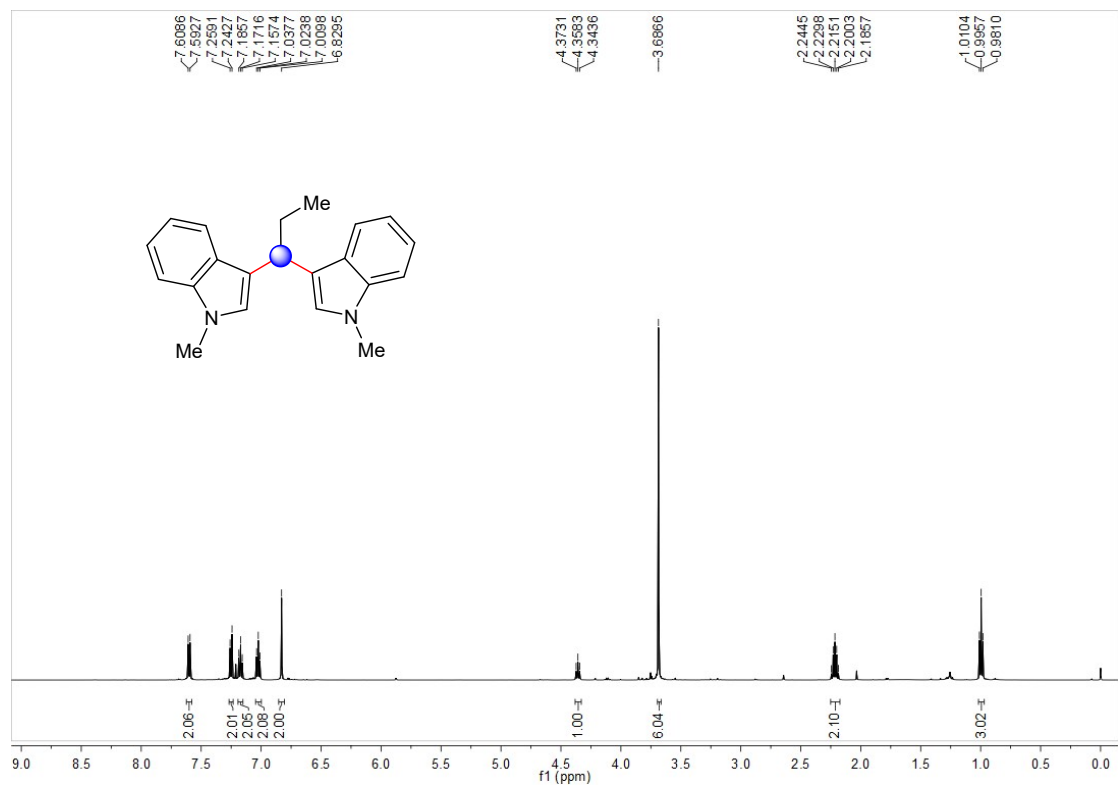

<sup>13</sup>C NMR

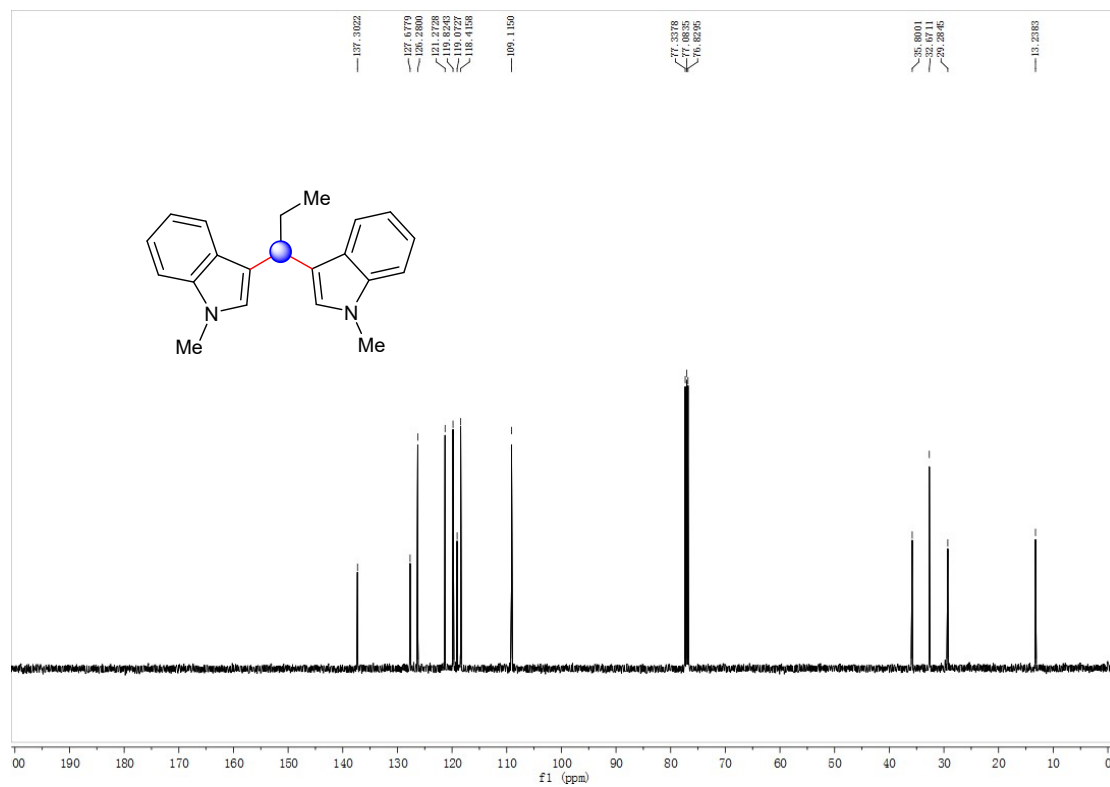

## 23c

<sup>1</sup>H NMR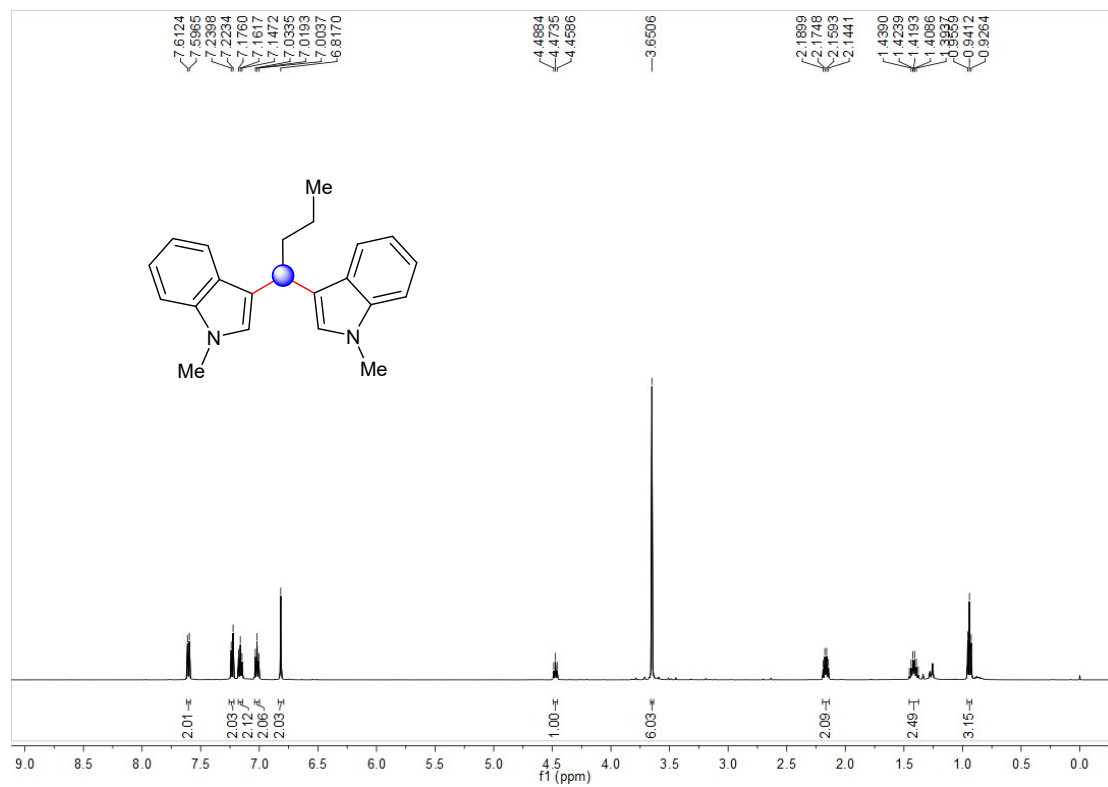<sup>13</sup>C NMR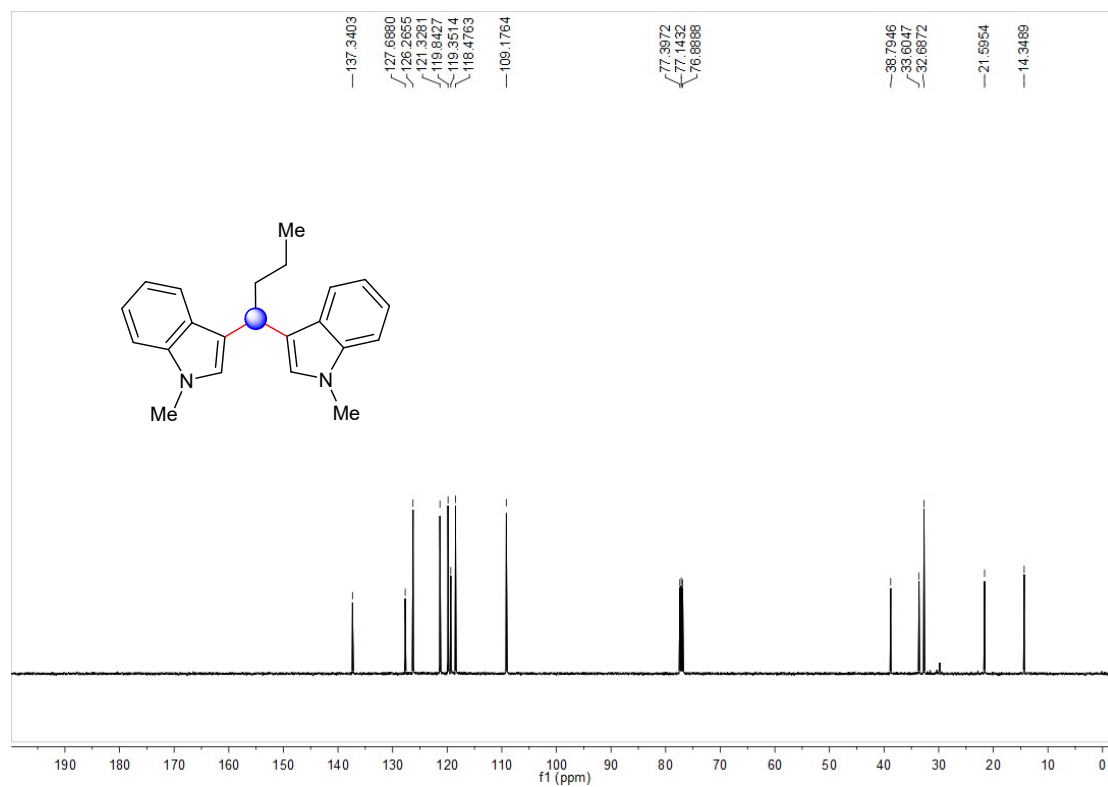

## 24c

<sup>1</sup>H NMR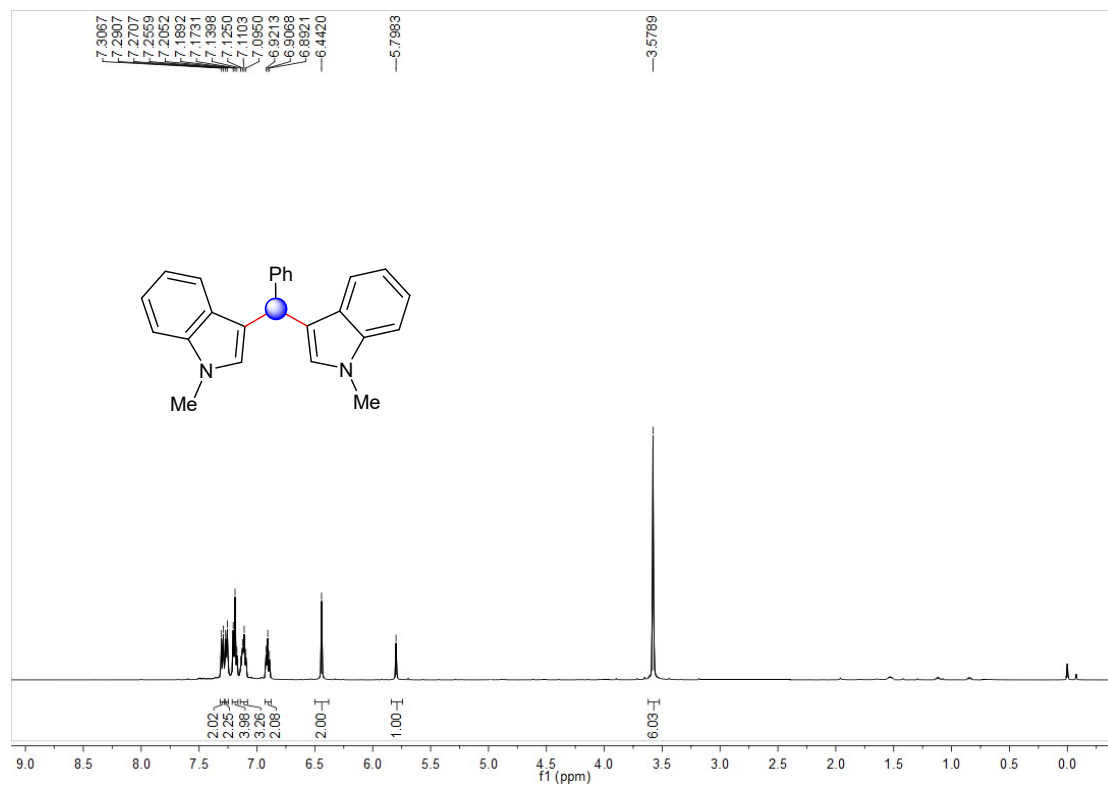<sup>13</sup>C NMR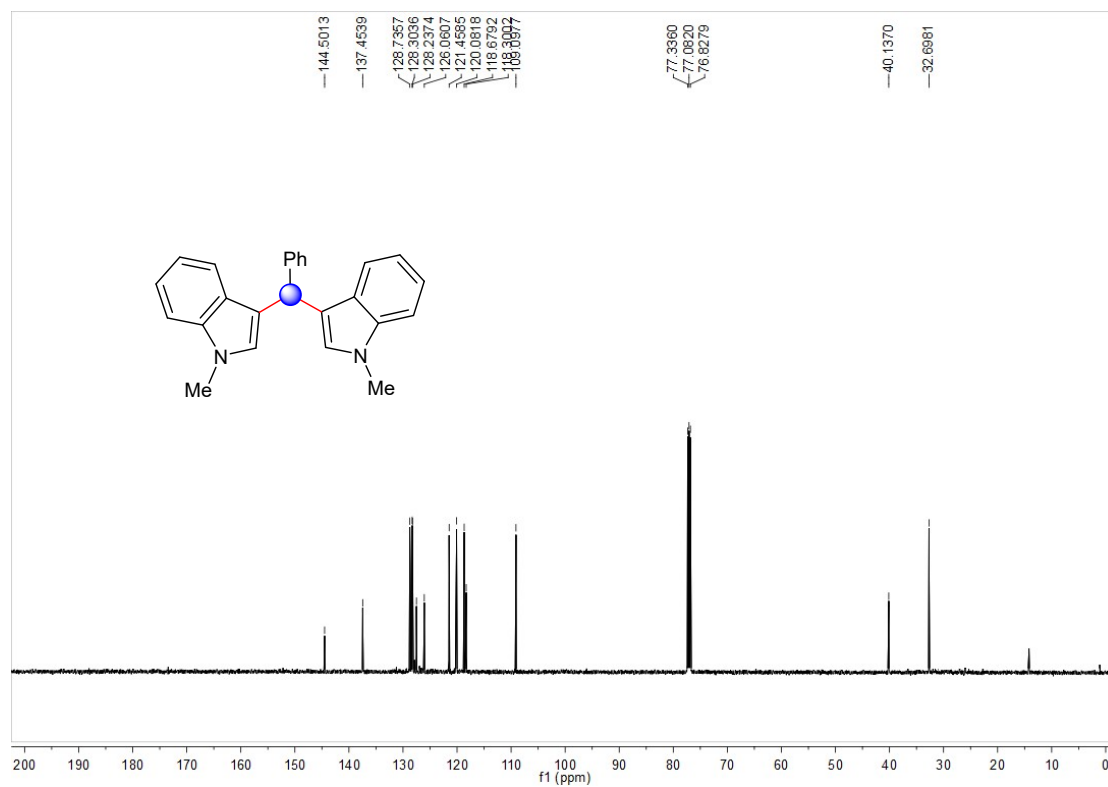

## 25c

<sup>1</sup>H NMR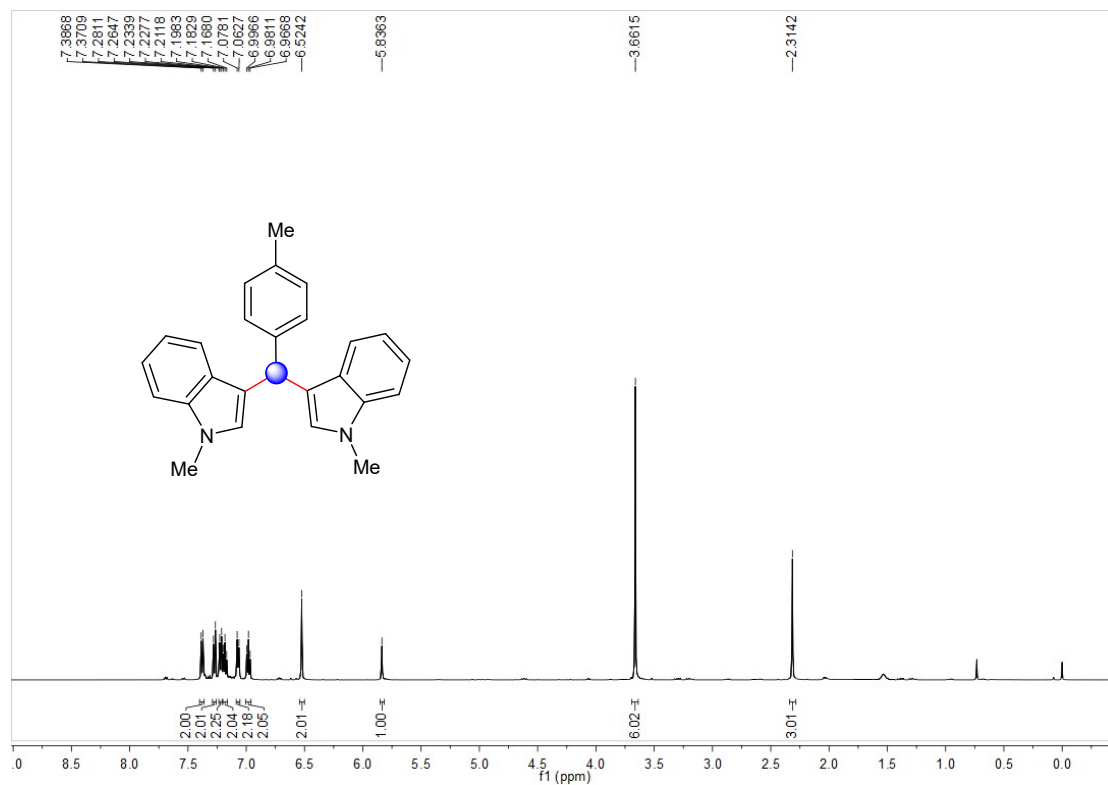<sup>13</sup>C NMR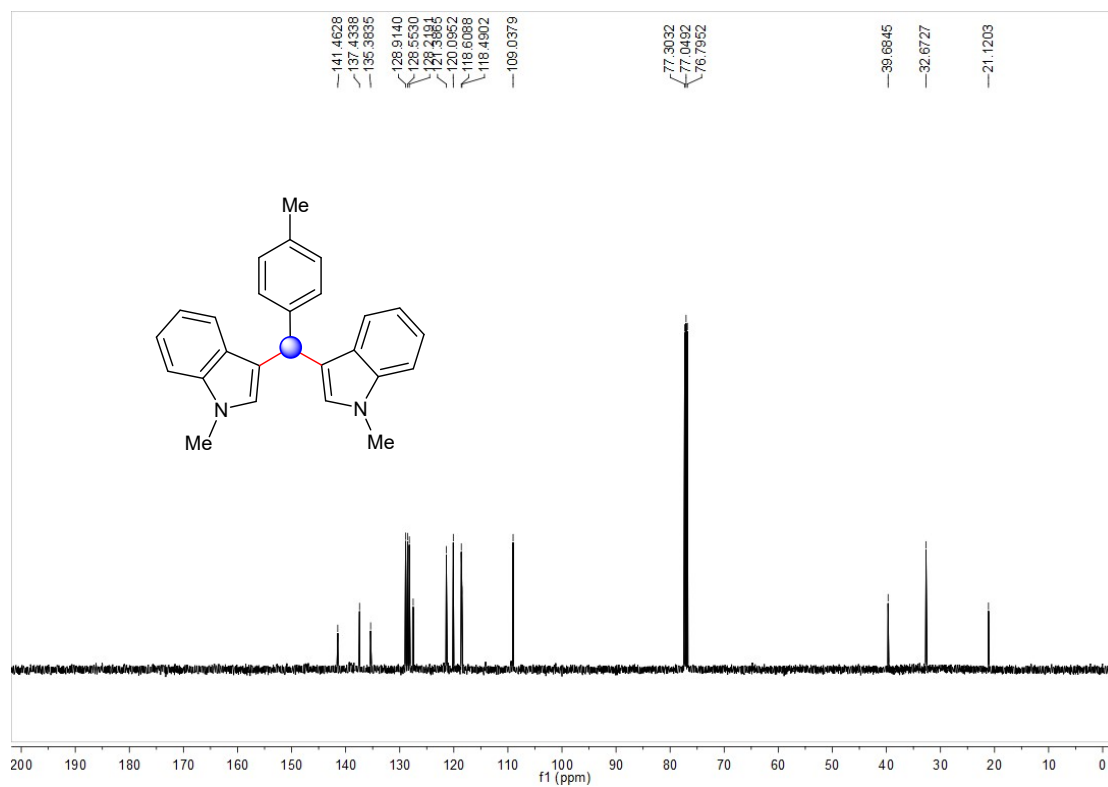

## 26c

<sup>1</sup>H NMR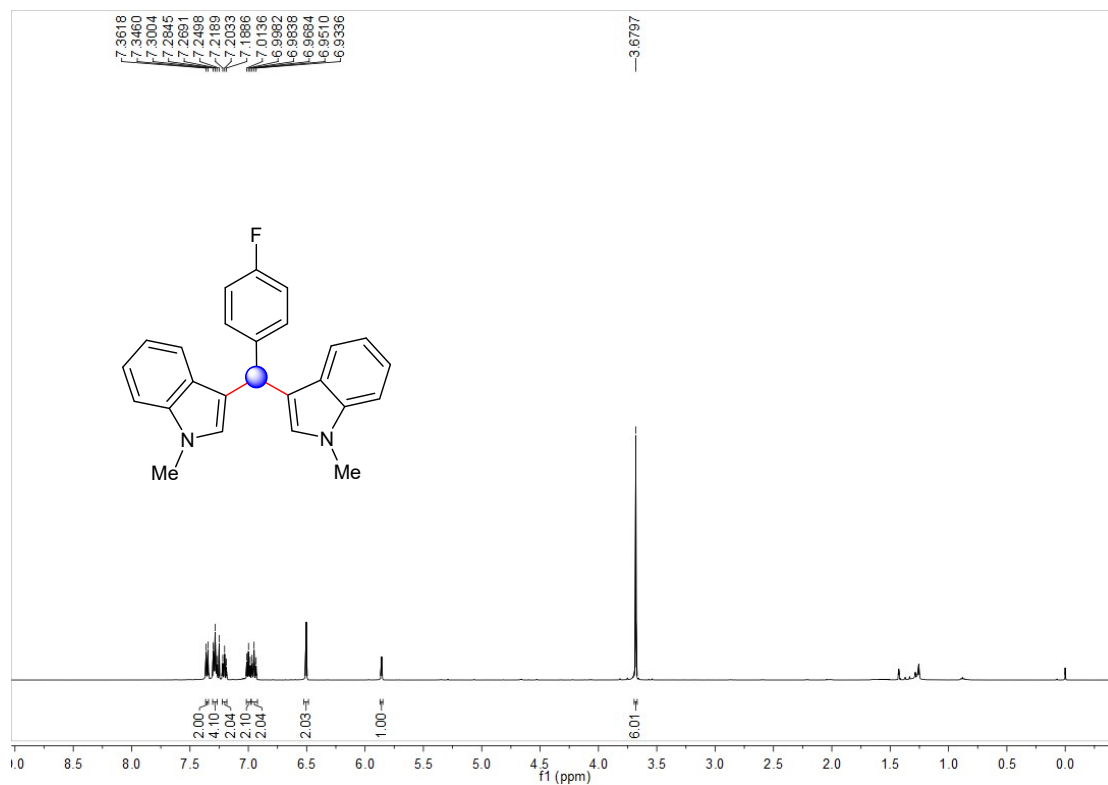<sup>13</sup>C NMR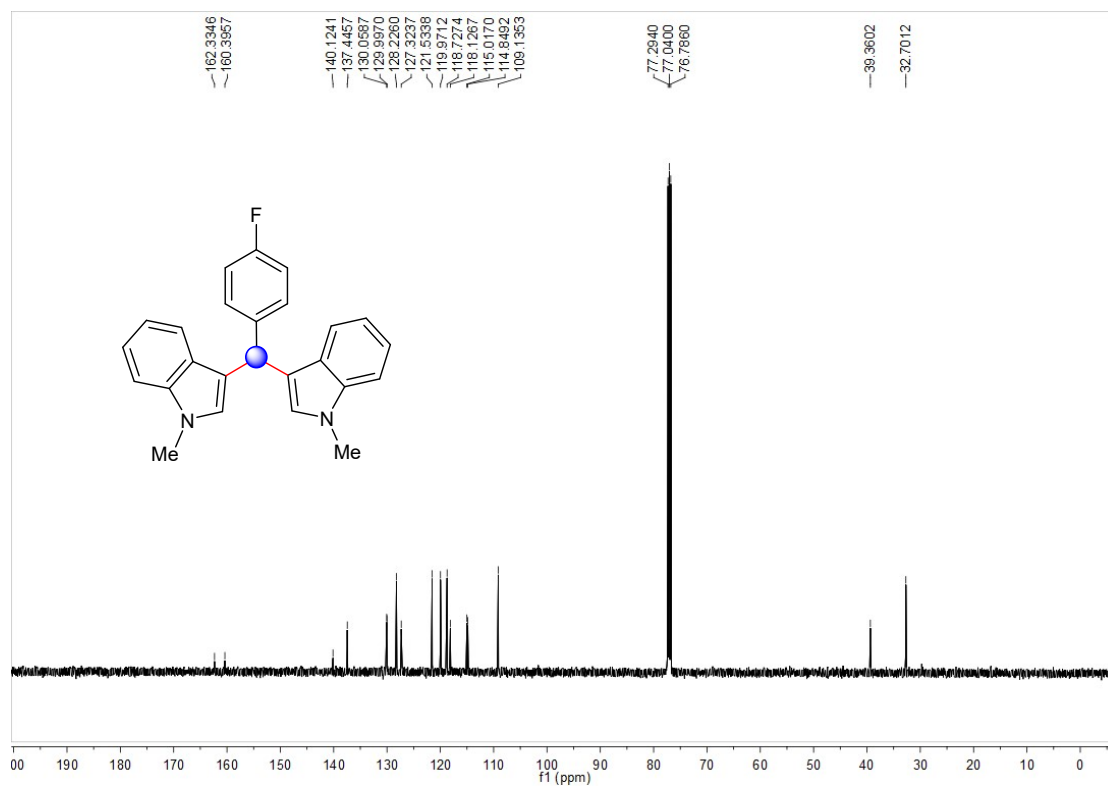

**<sup>19</sup>F NMR**

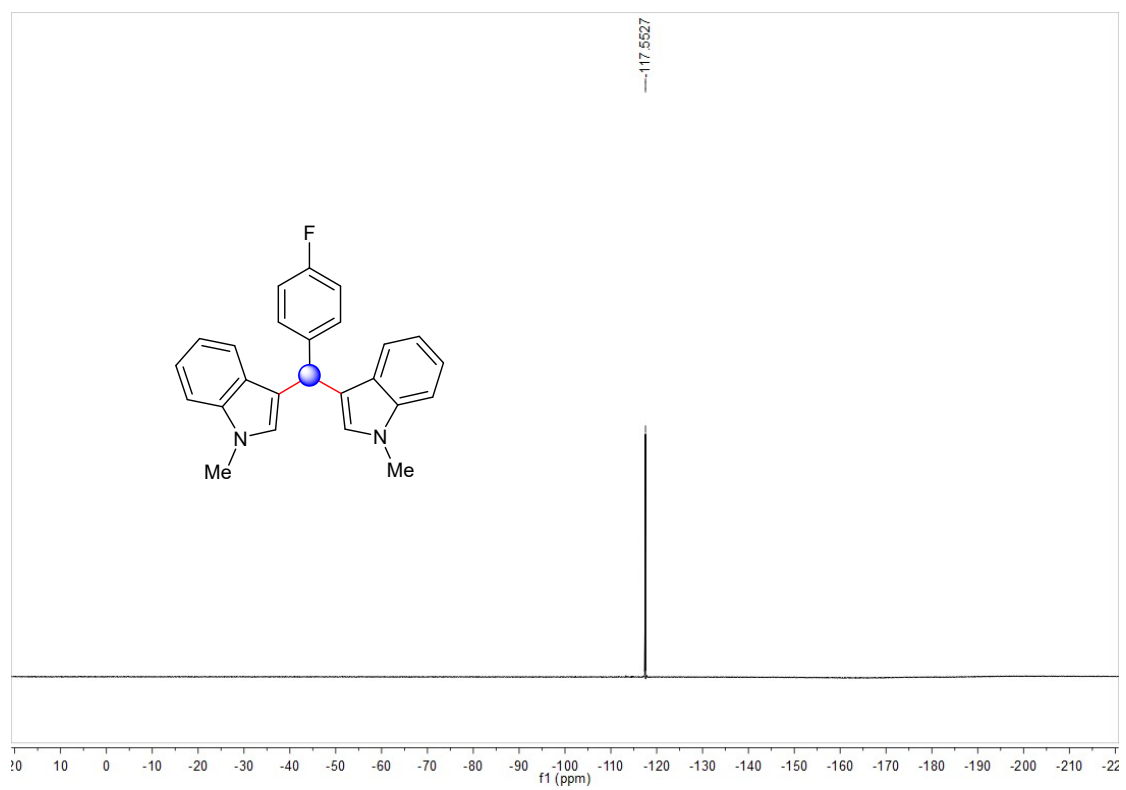

27c

<sup>1</sup>H NMR

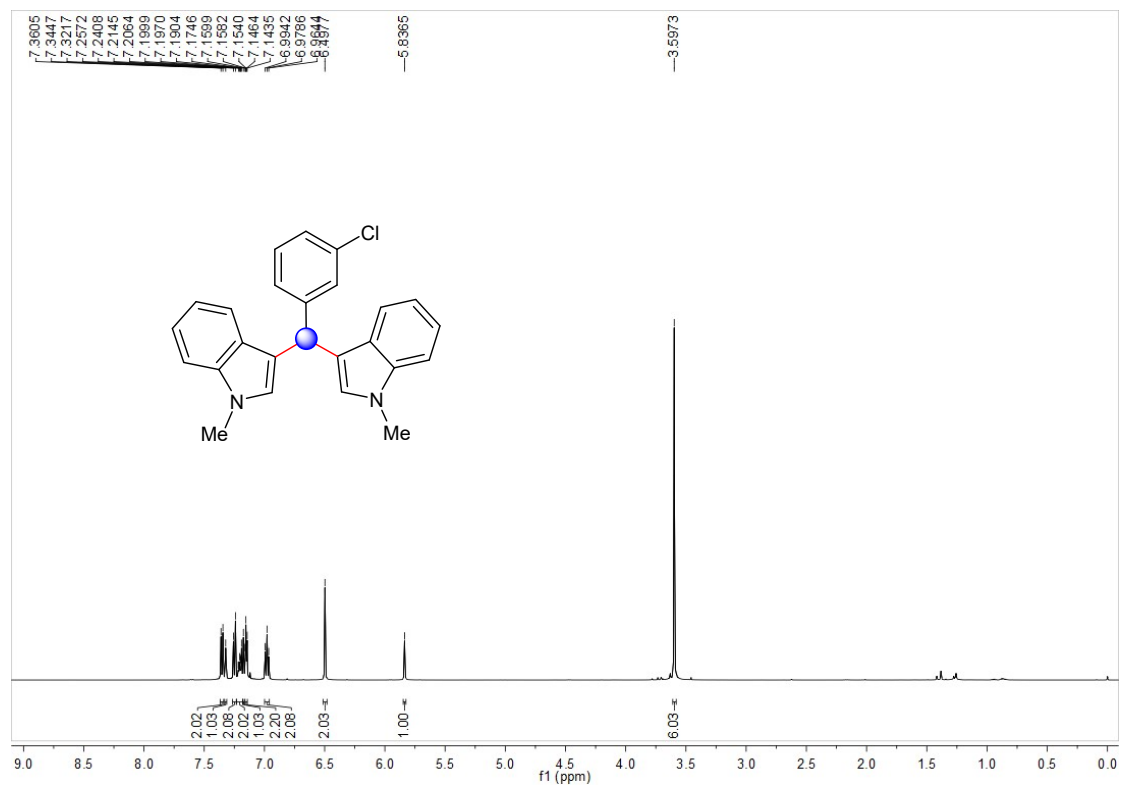

<sup>13</sup>C NMR

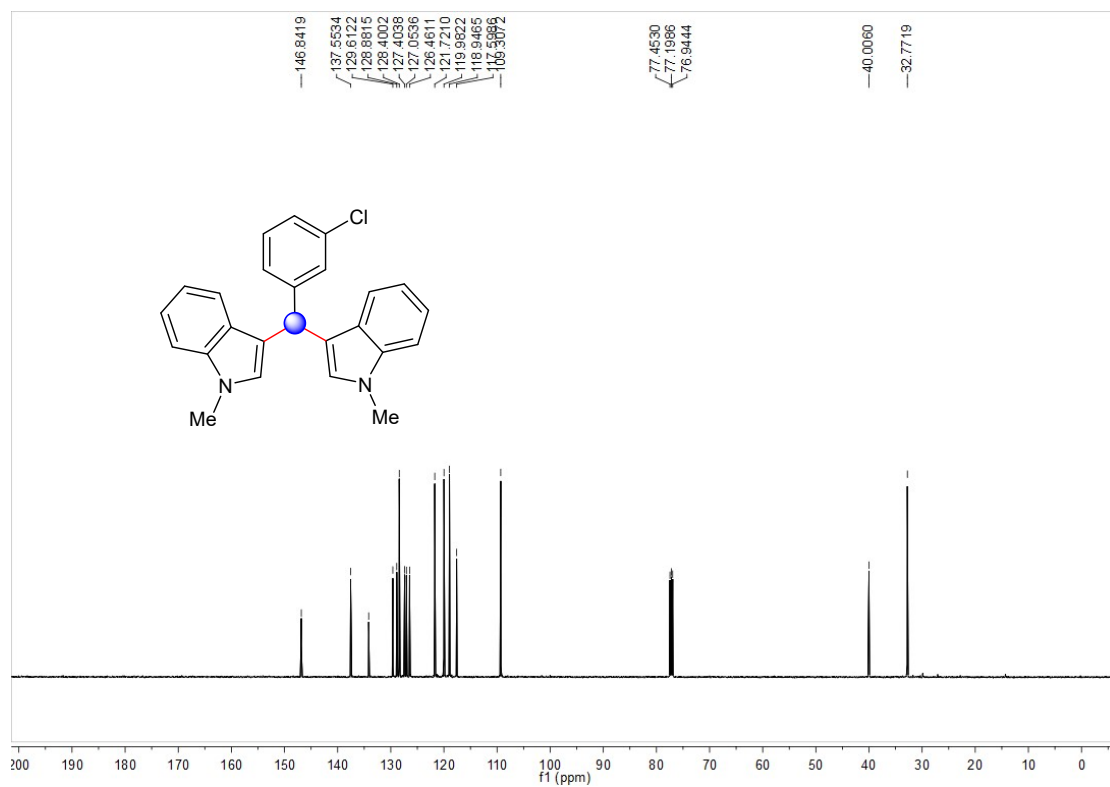



28c

<sup>1</sup>H NMR

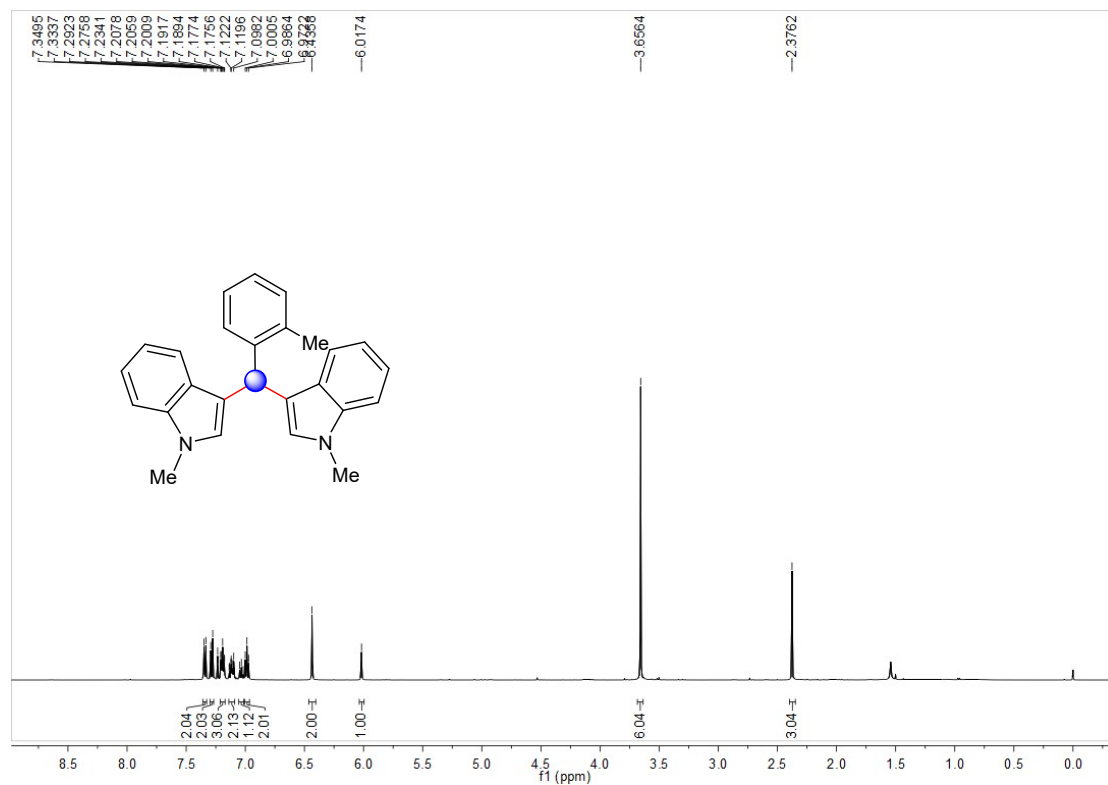

<sup>13</sup>C NMR

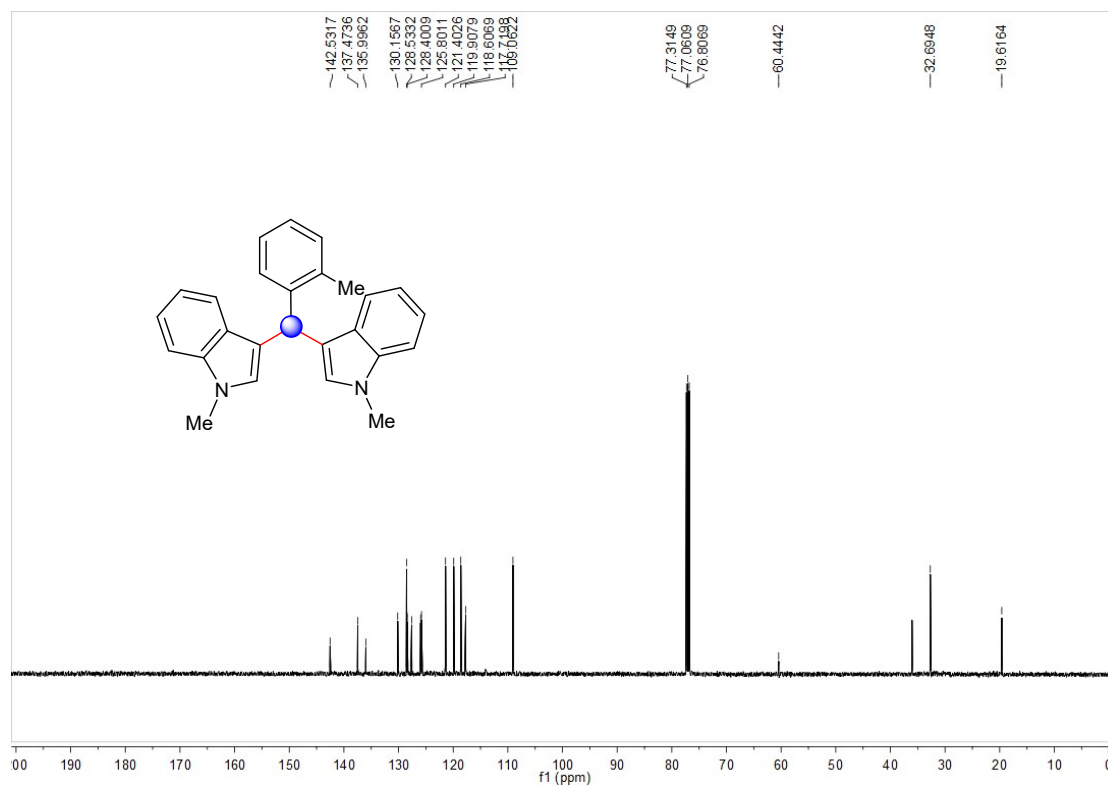

## 29c

<sup>1</sup>H NMR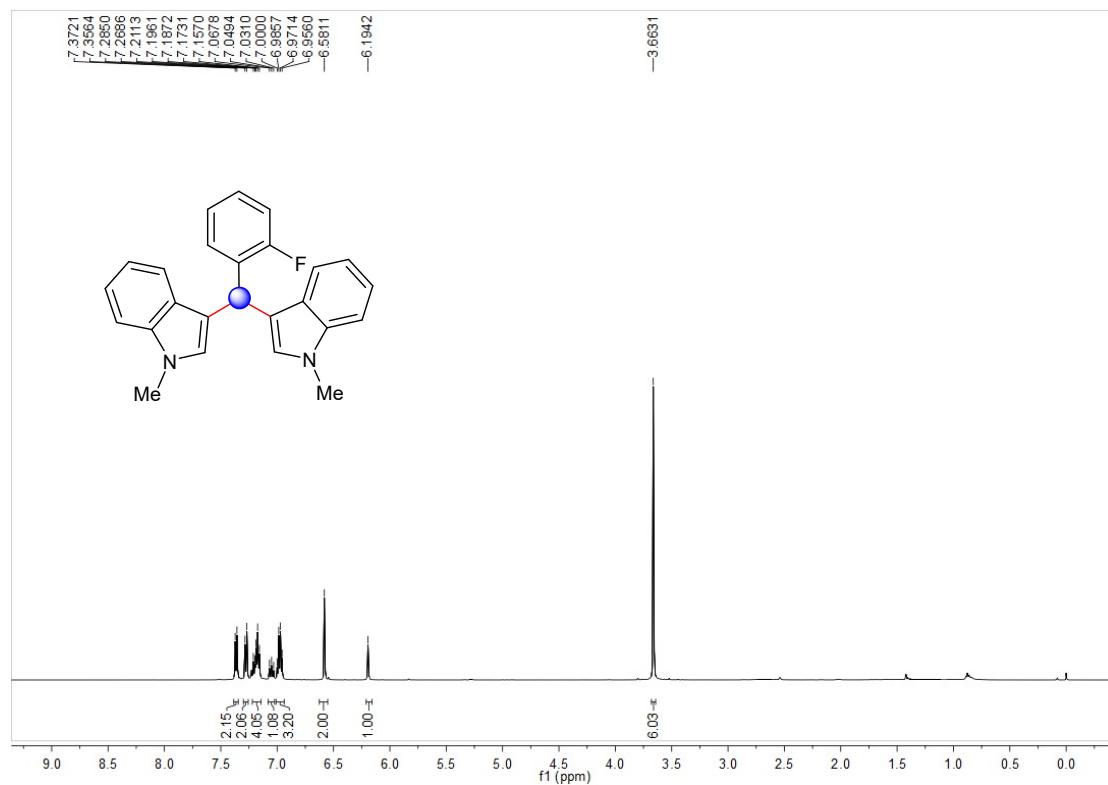<sup>13</sup>C NMR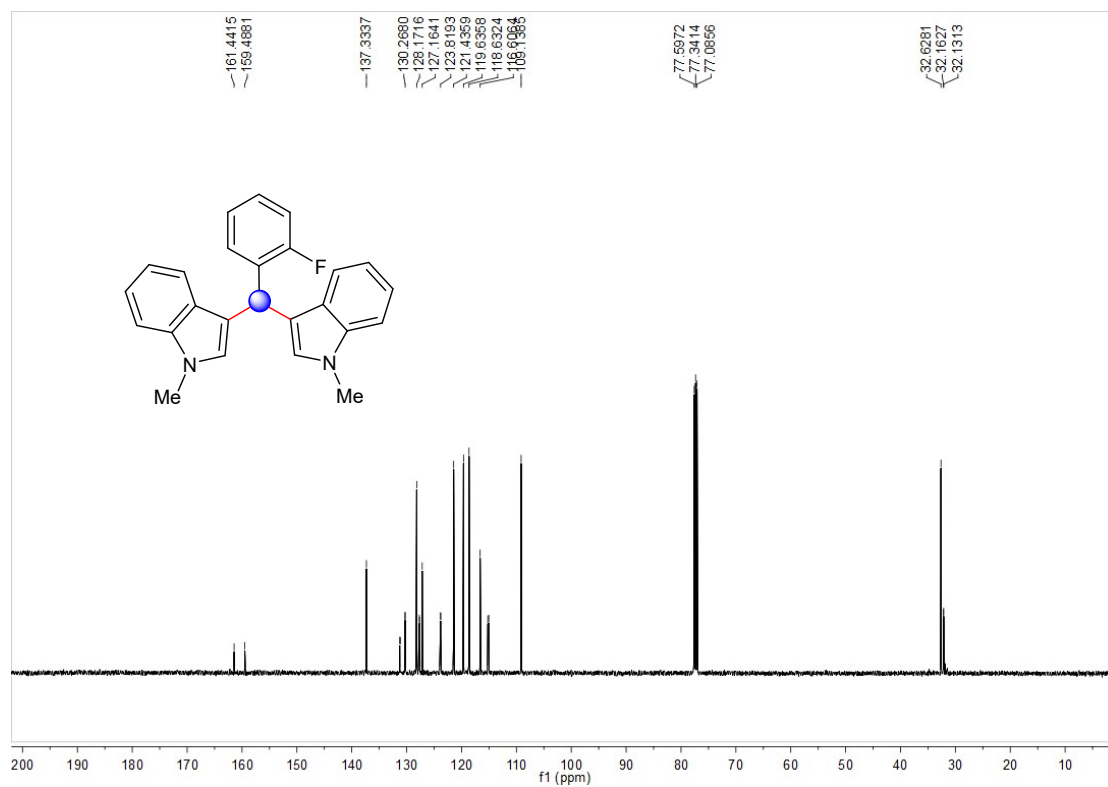

**<sup>19</sup>F NMR**

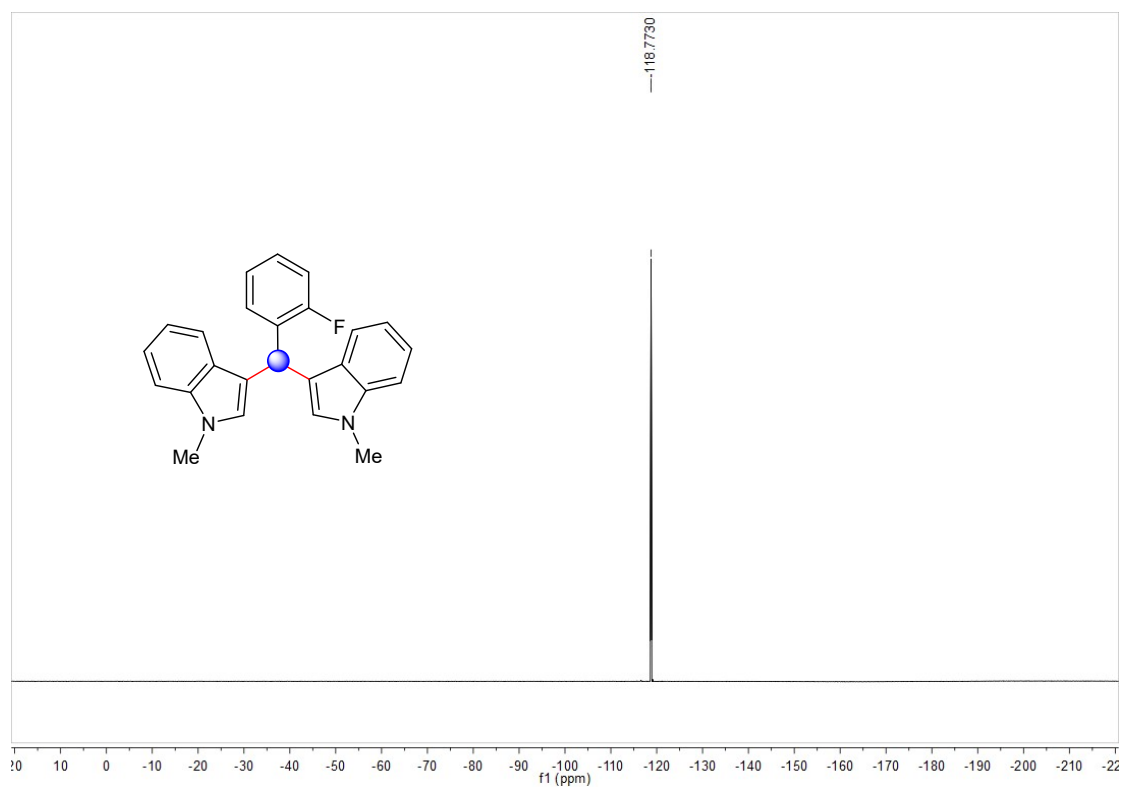

30c

<sup>1</sup>H NMR

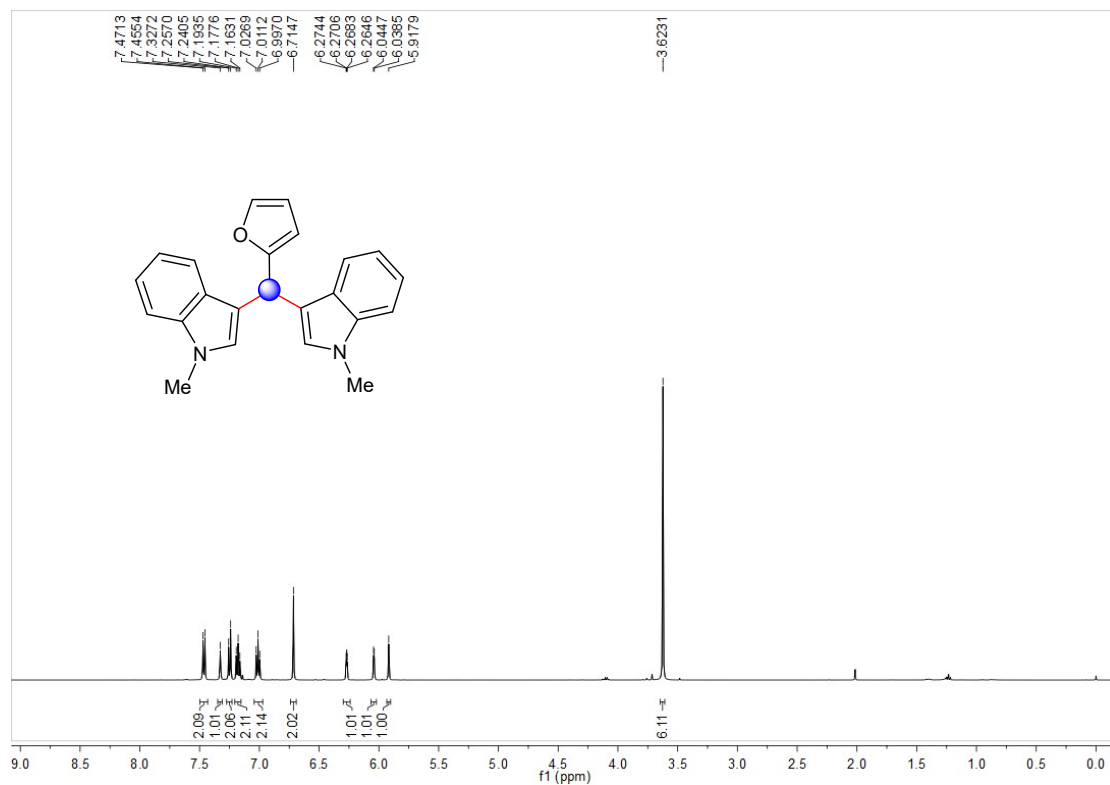

<sup>13</sup>C NMR

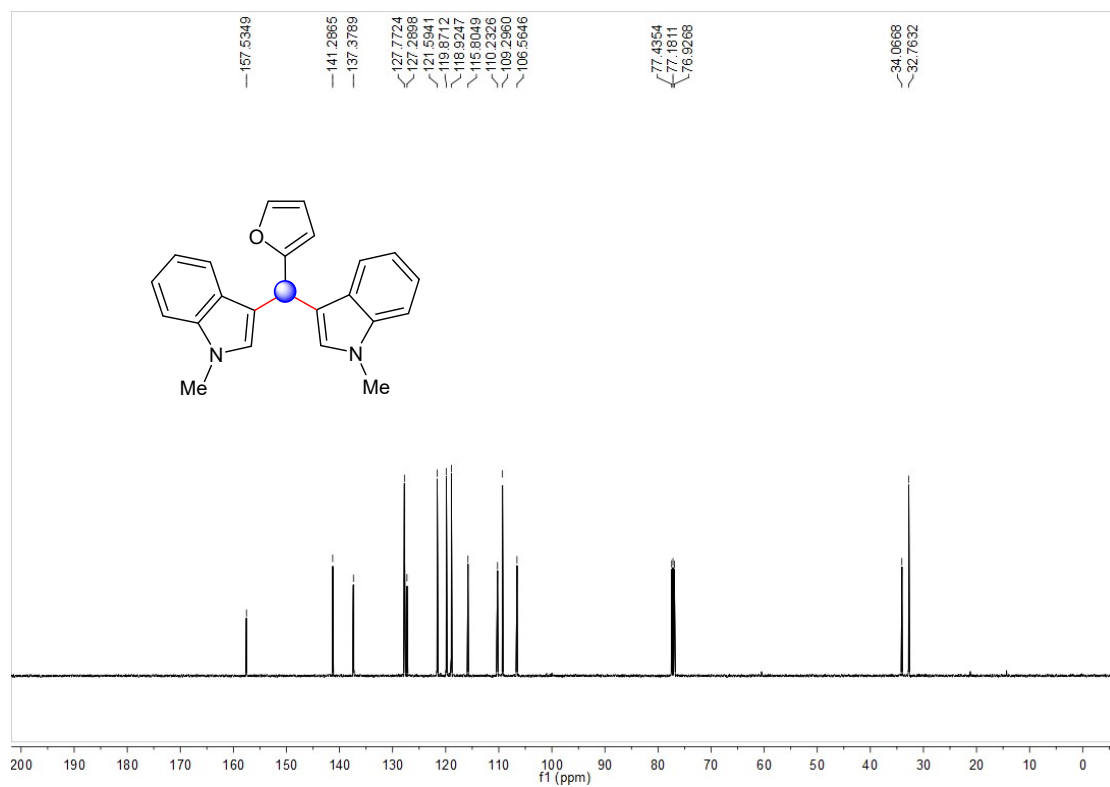

## 31c

<sup>1</sup>H NMR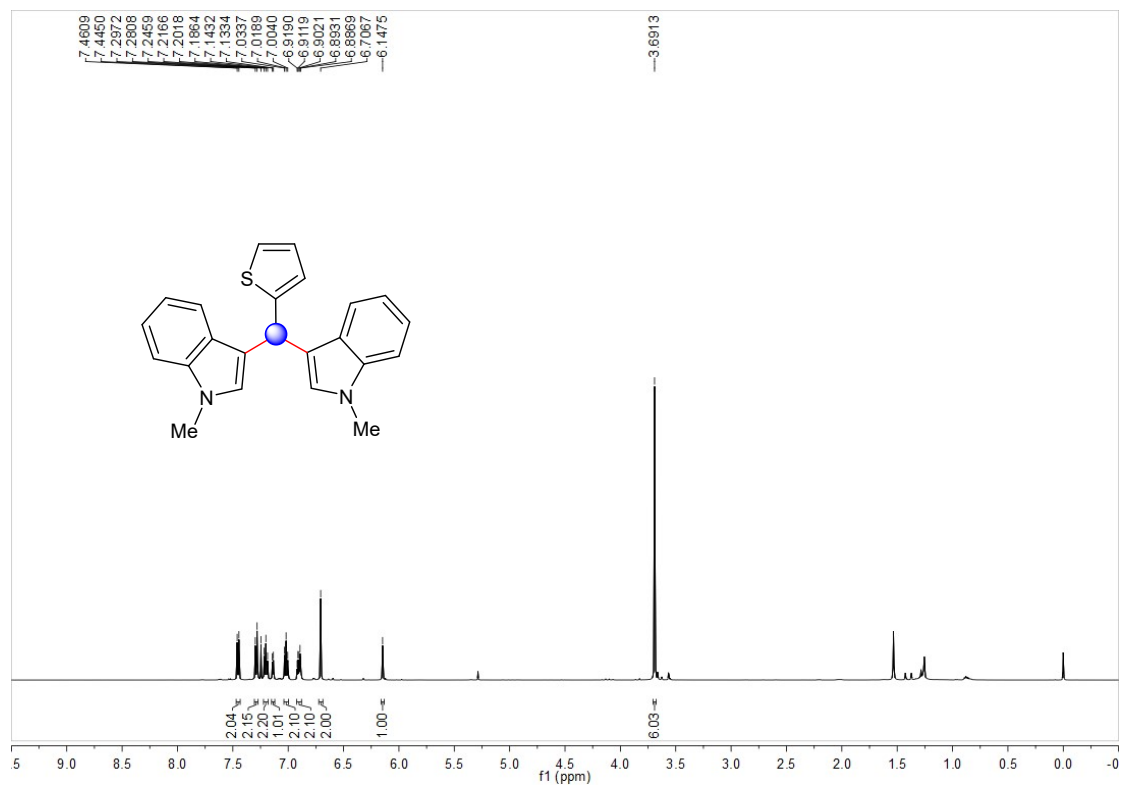<sup>13</sup>C NMR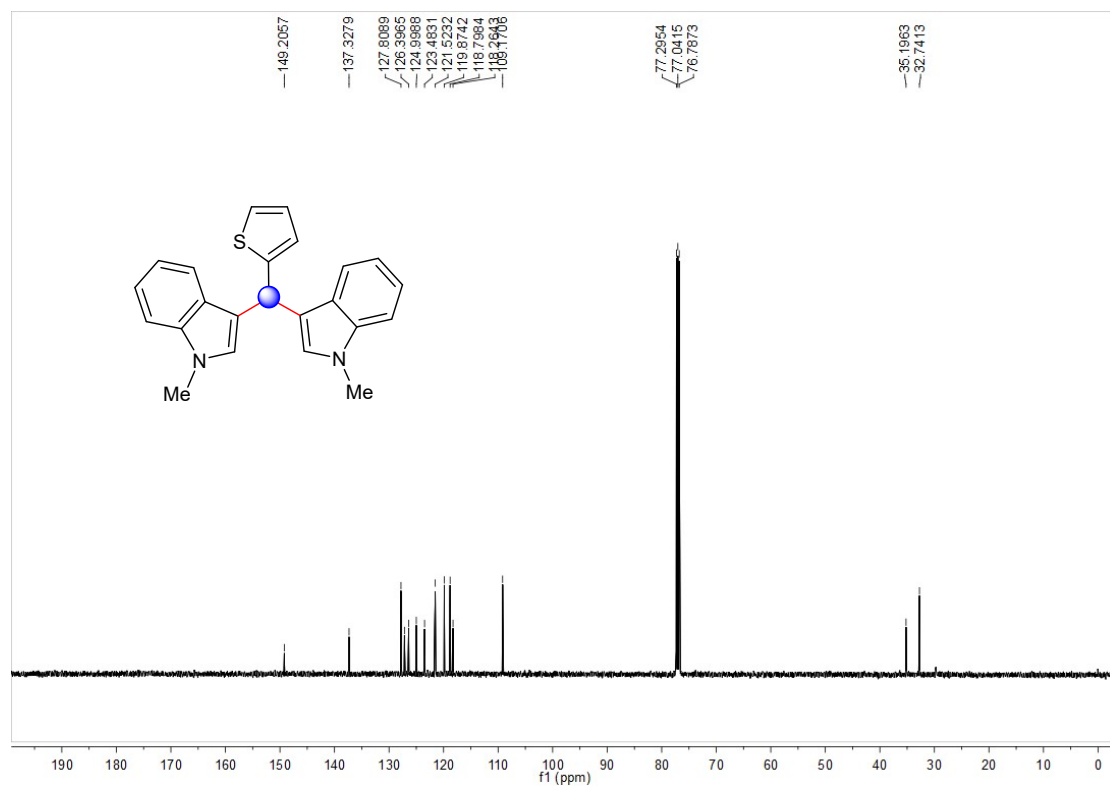

## 32c

<sup>1</sup>H NMR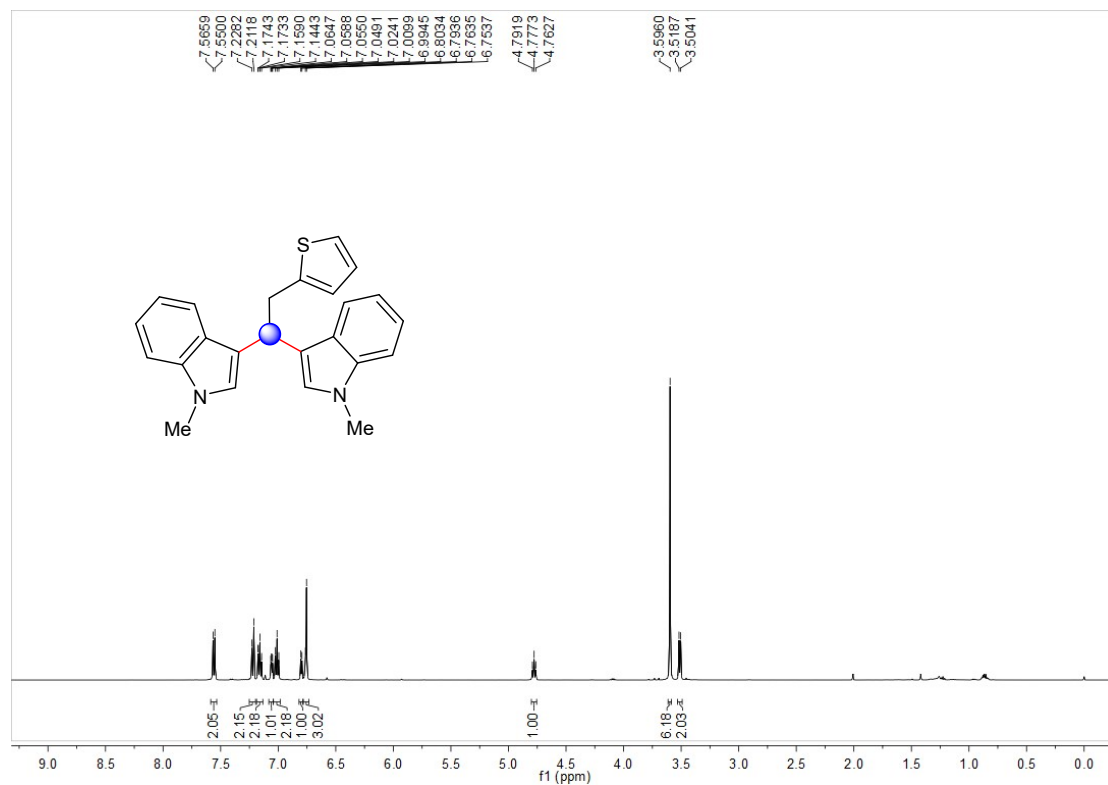<sup>13</sup>C NMR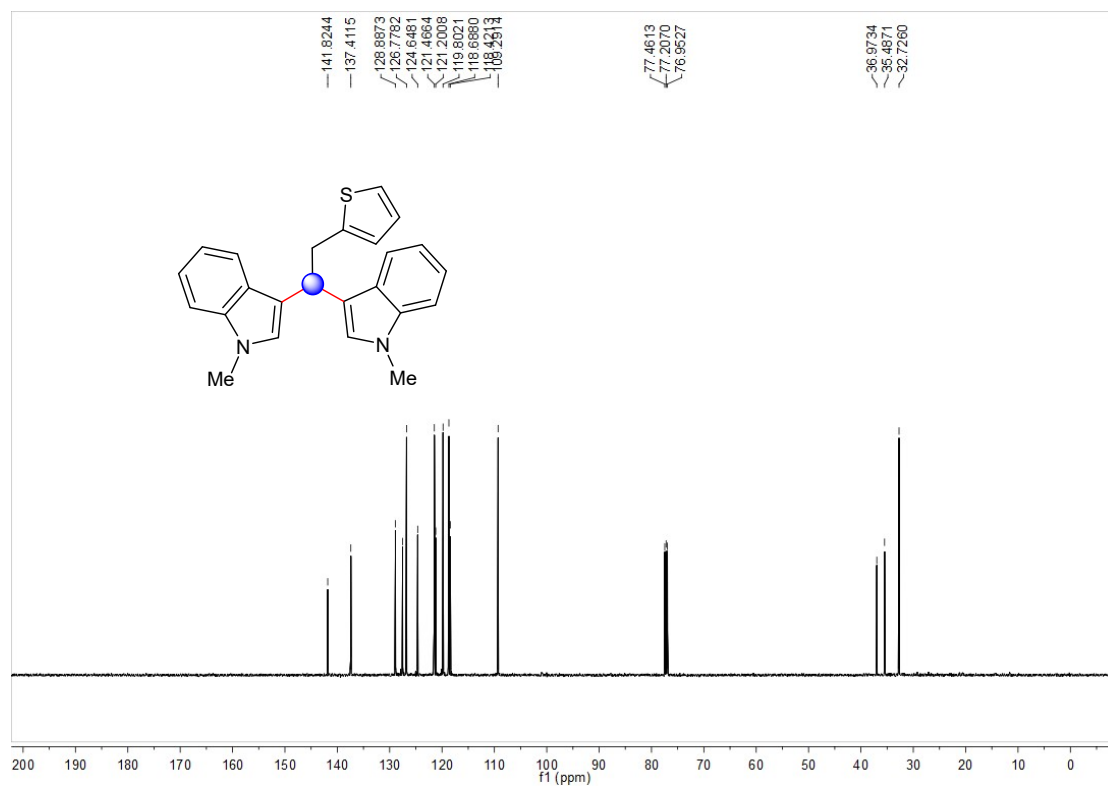

33c

<sup>1</sup>H NMR

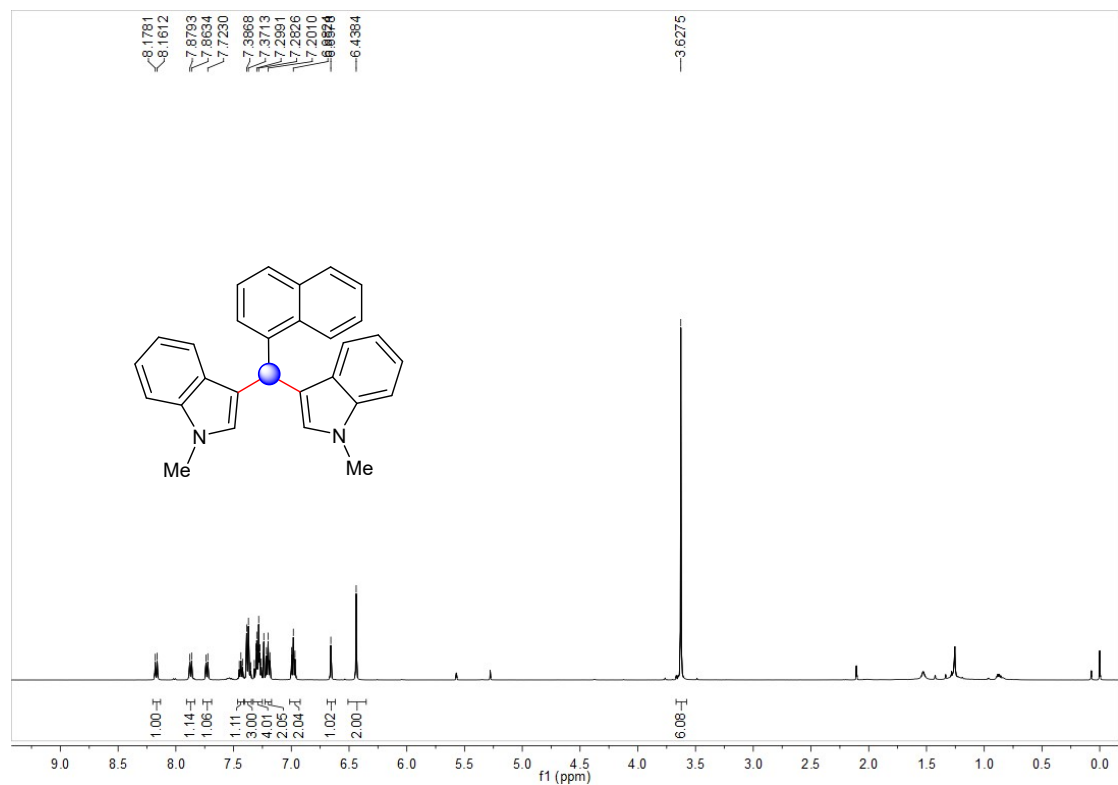

<sup>13</sup>C NMR

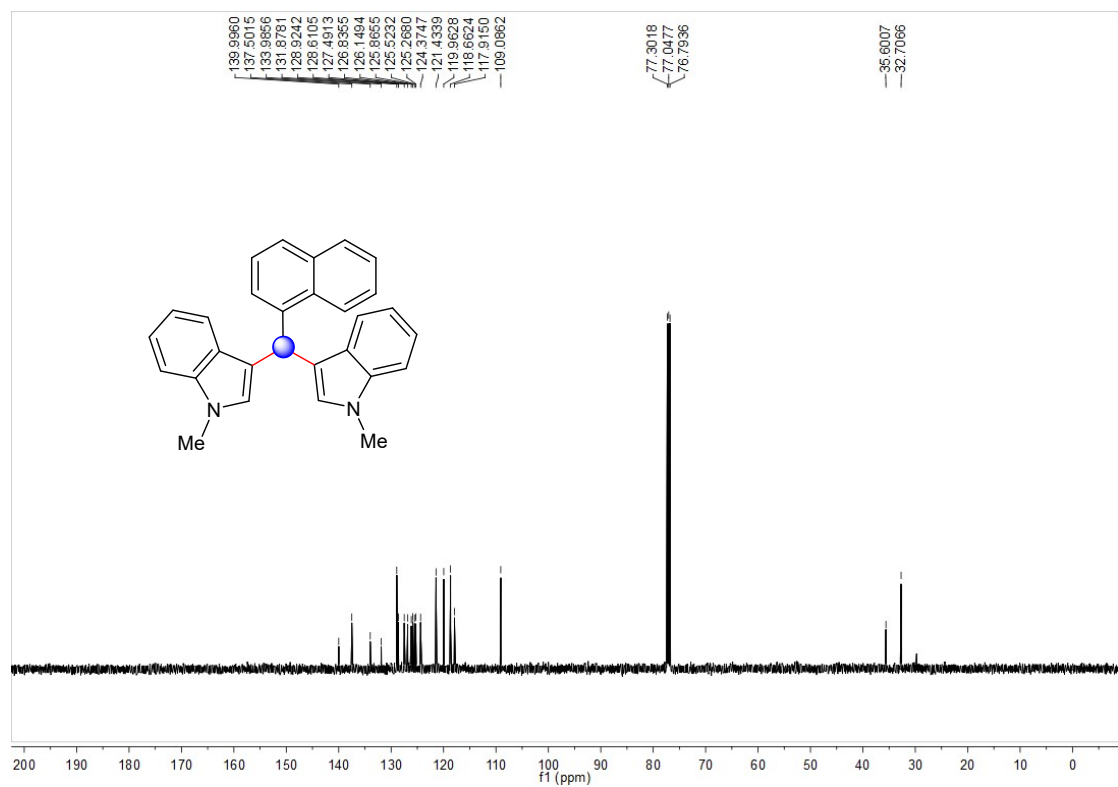

## 34c

<sup>1</sup>H NMR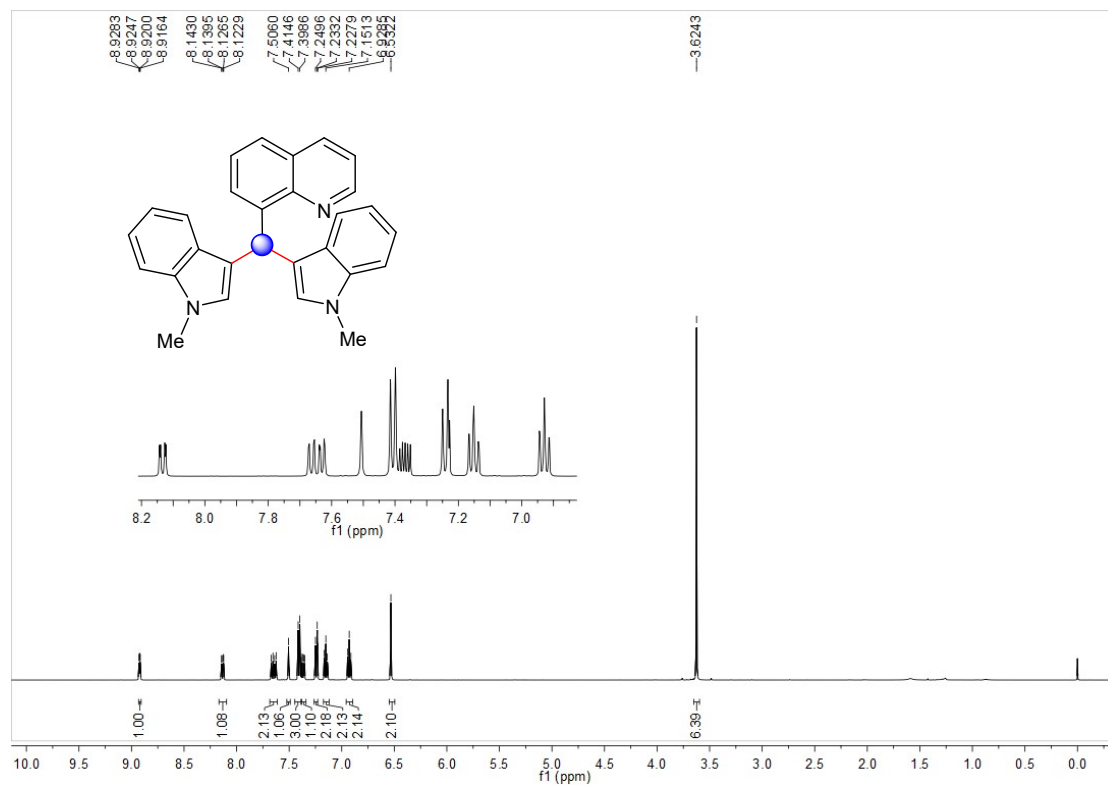<sup>13</sup>C NMR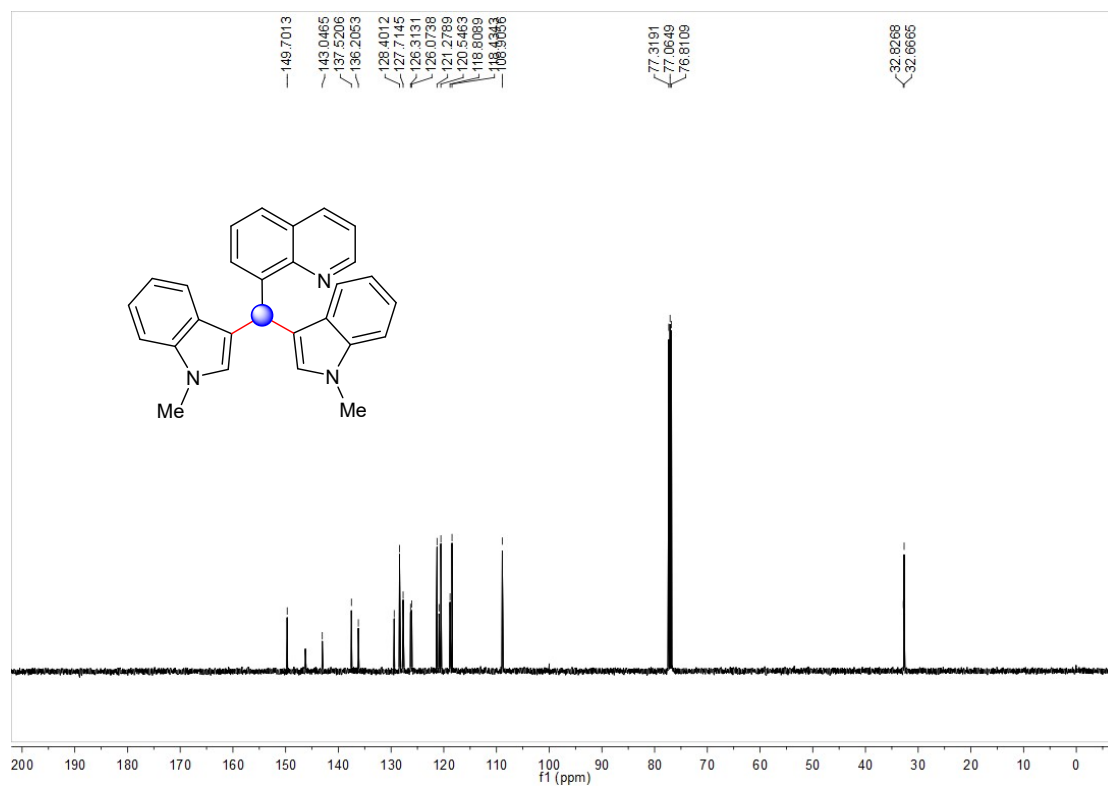



37c

<sup>1</sup>H NMR

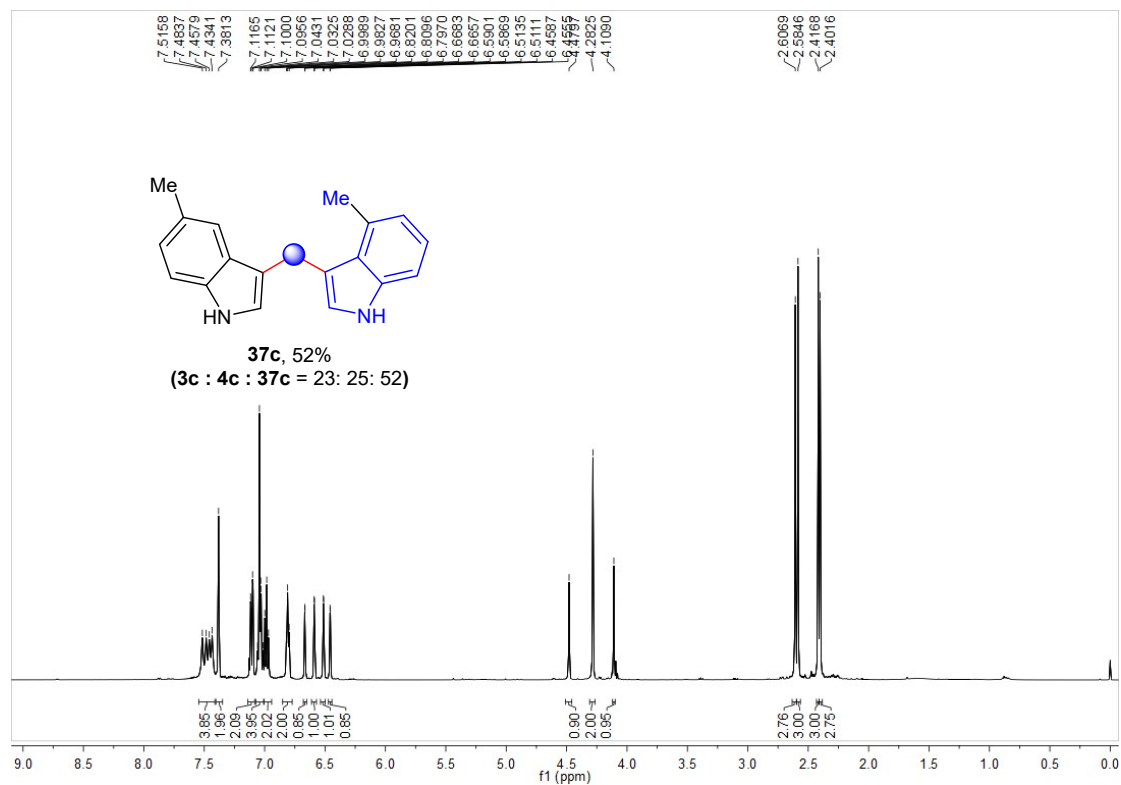

<sup>13</sup>C NMR

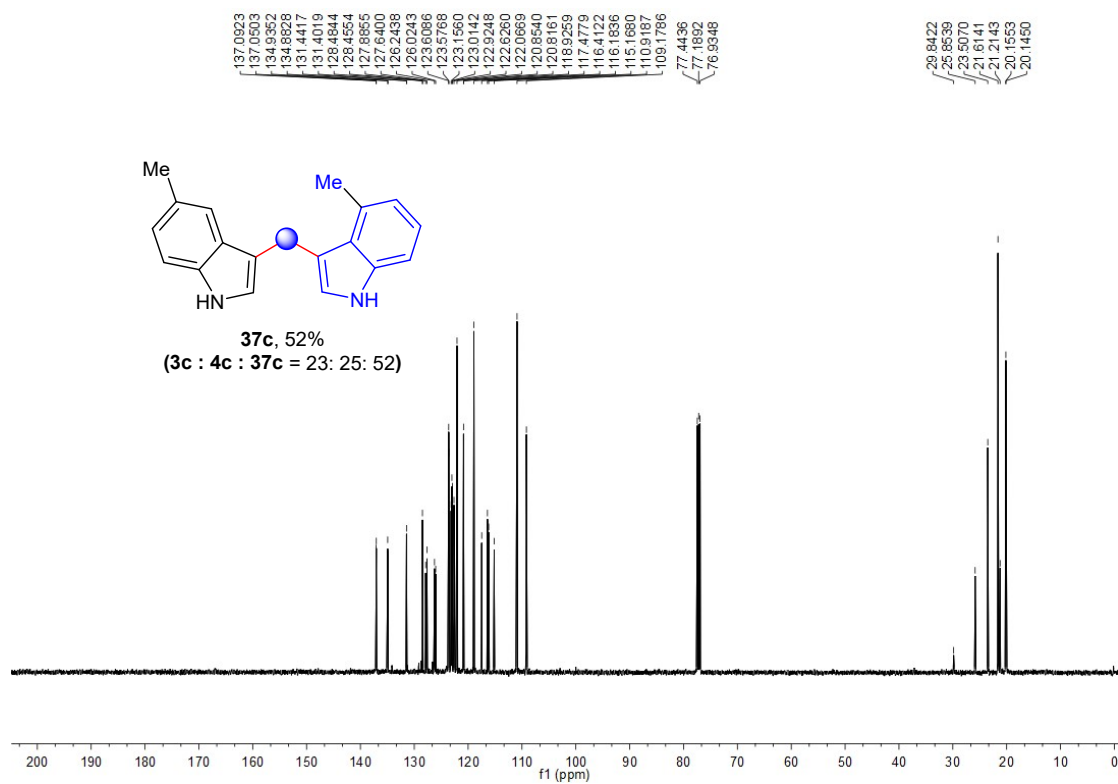

### 38c

#### <sup>1</sup>H NMR

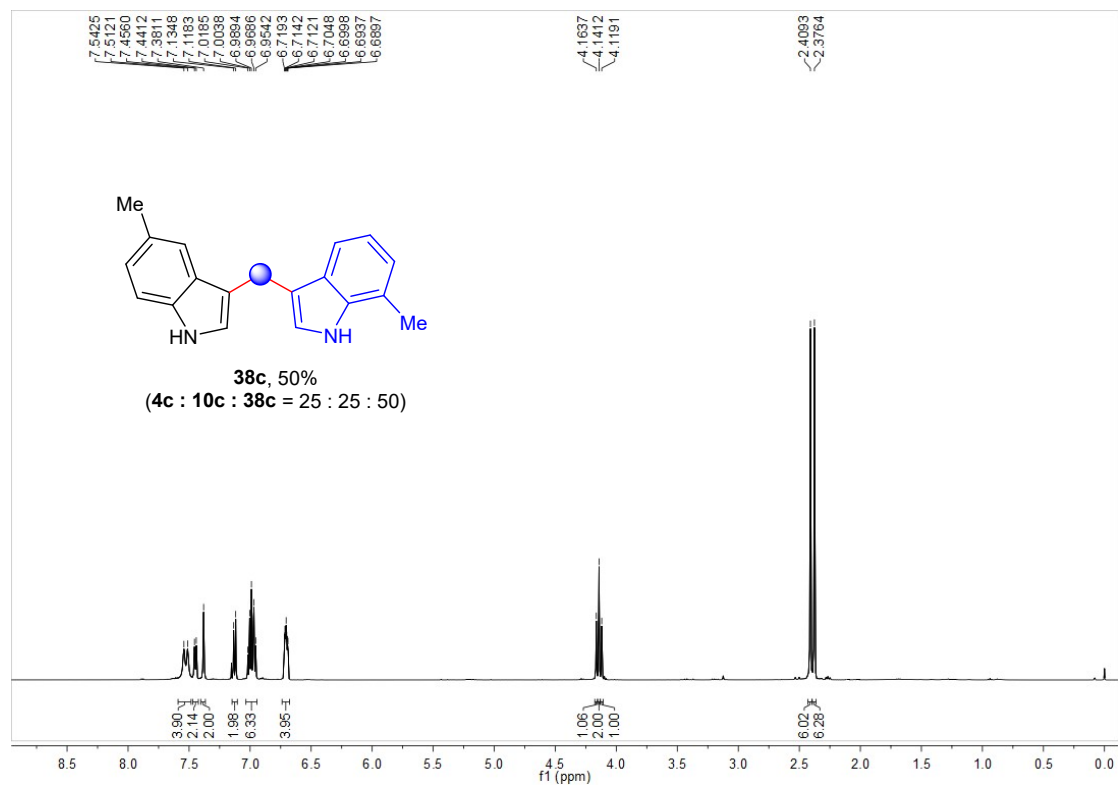

#### <sup>13</sup>C NMR

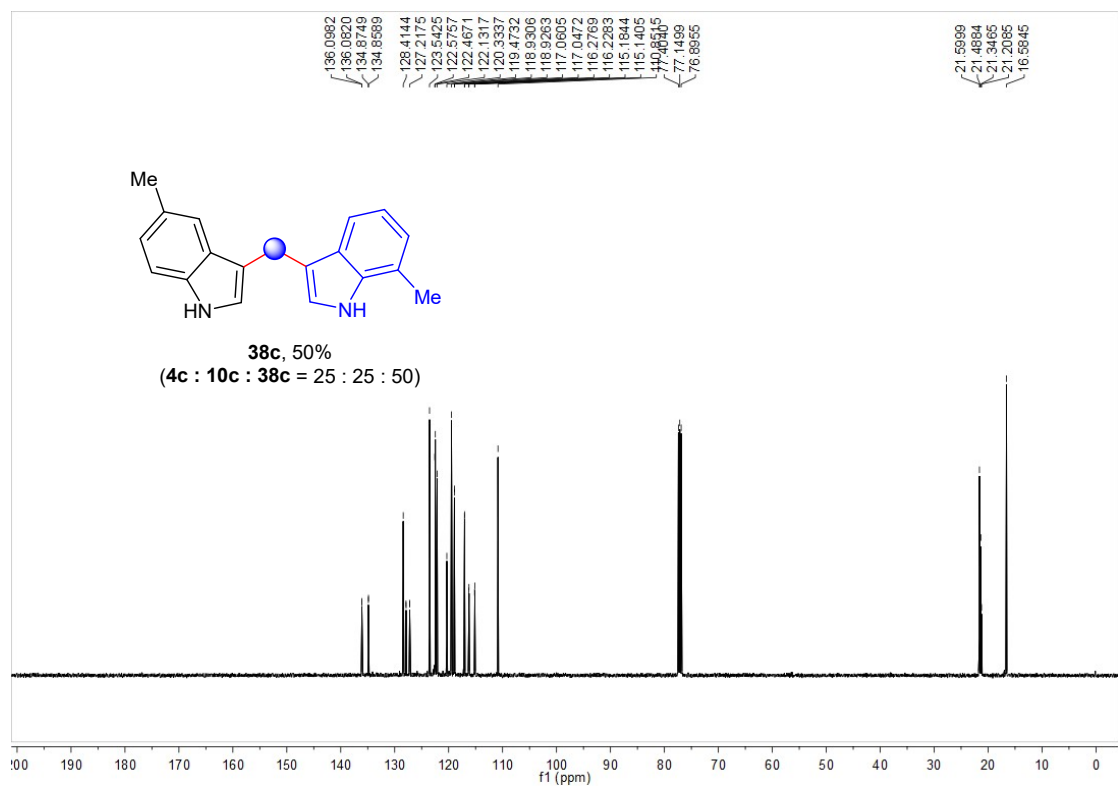

39c

<sup>1</sup>H NMR

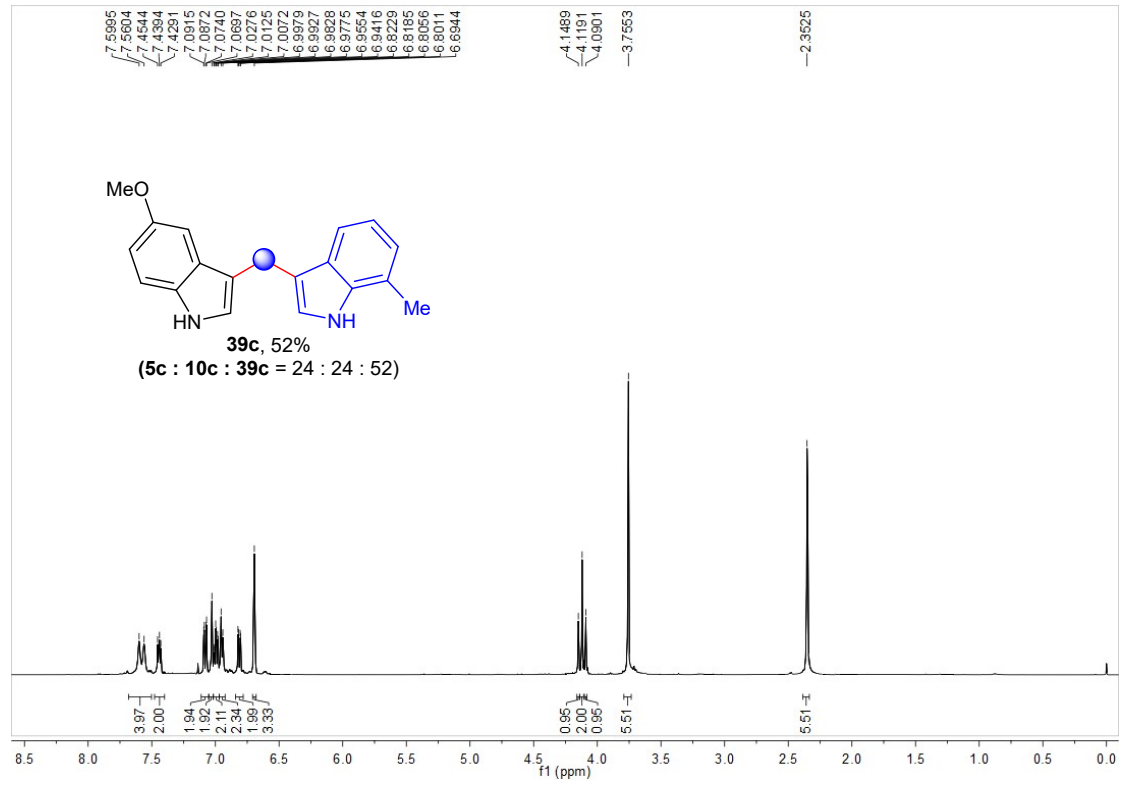

<sup>13</sup>C NMR

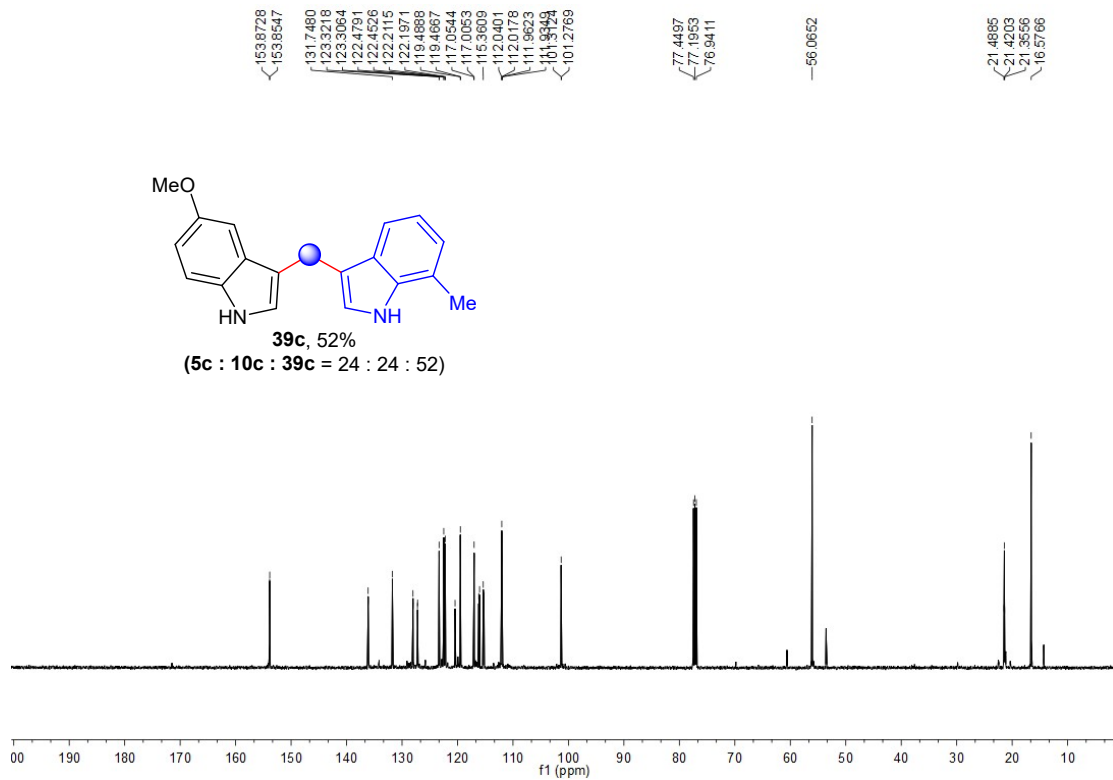

40c

<sup>1</sup>H NMR

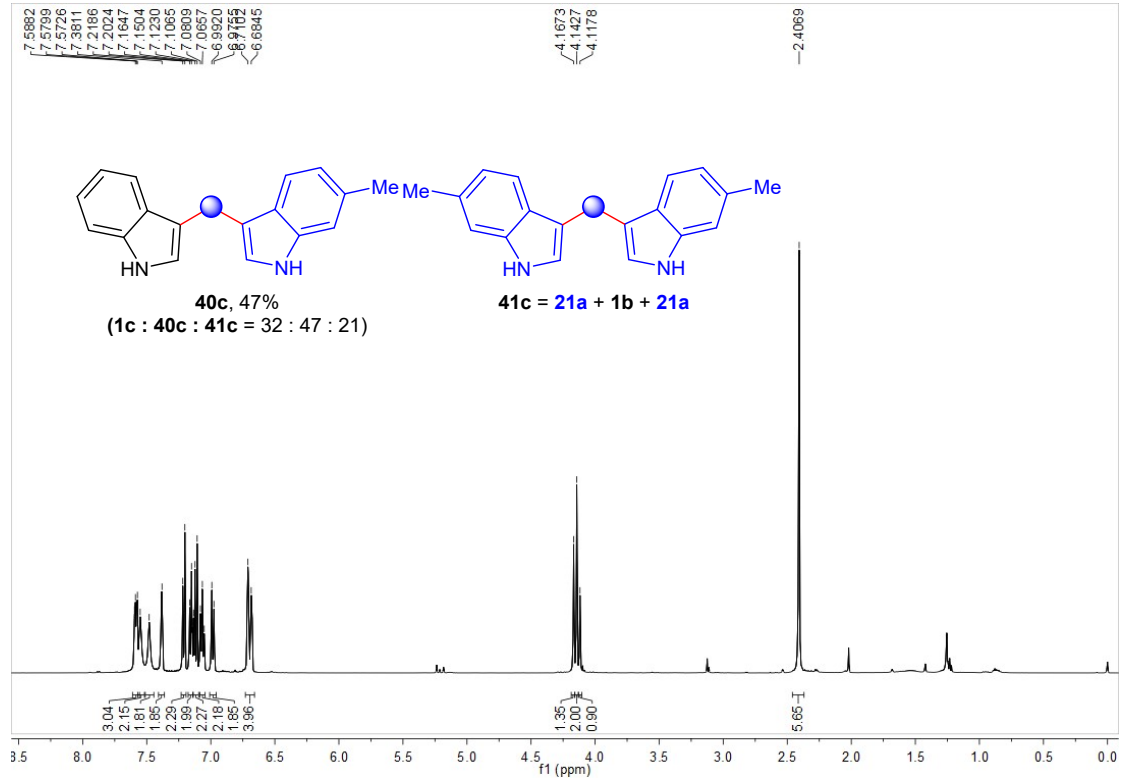

<sup>13</sup>C NMR

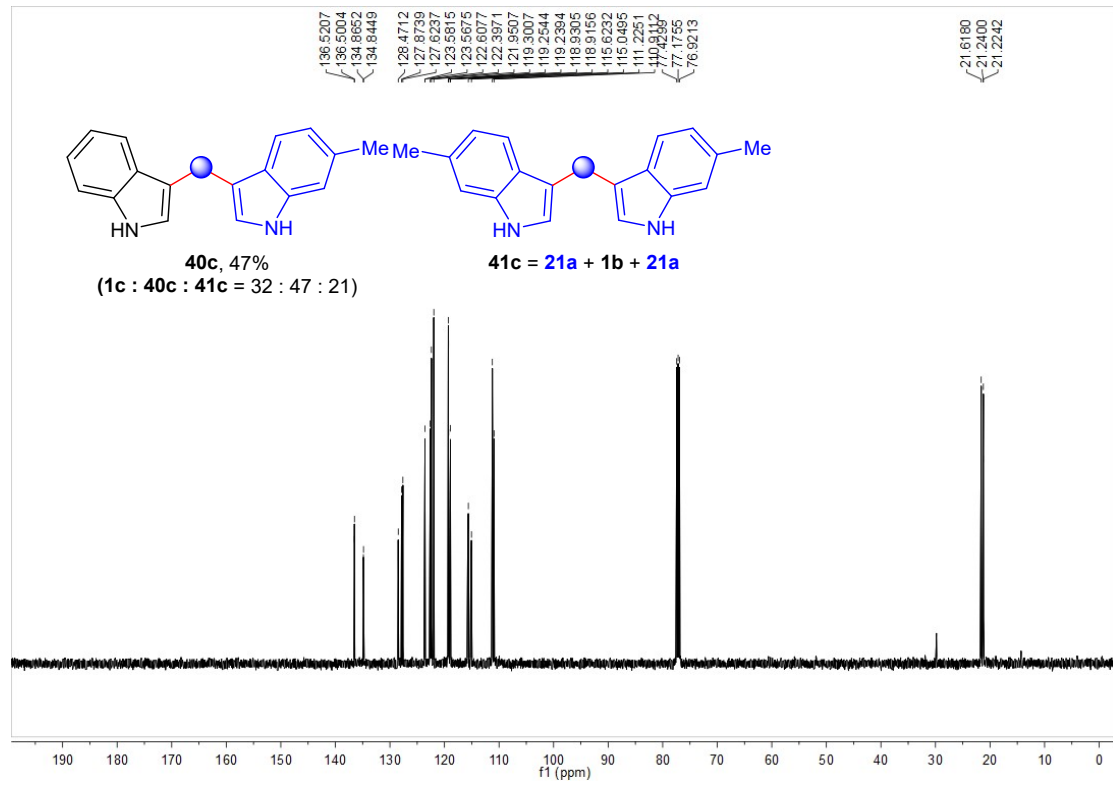

## 42c

<sup>1</sup>H NMR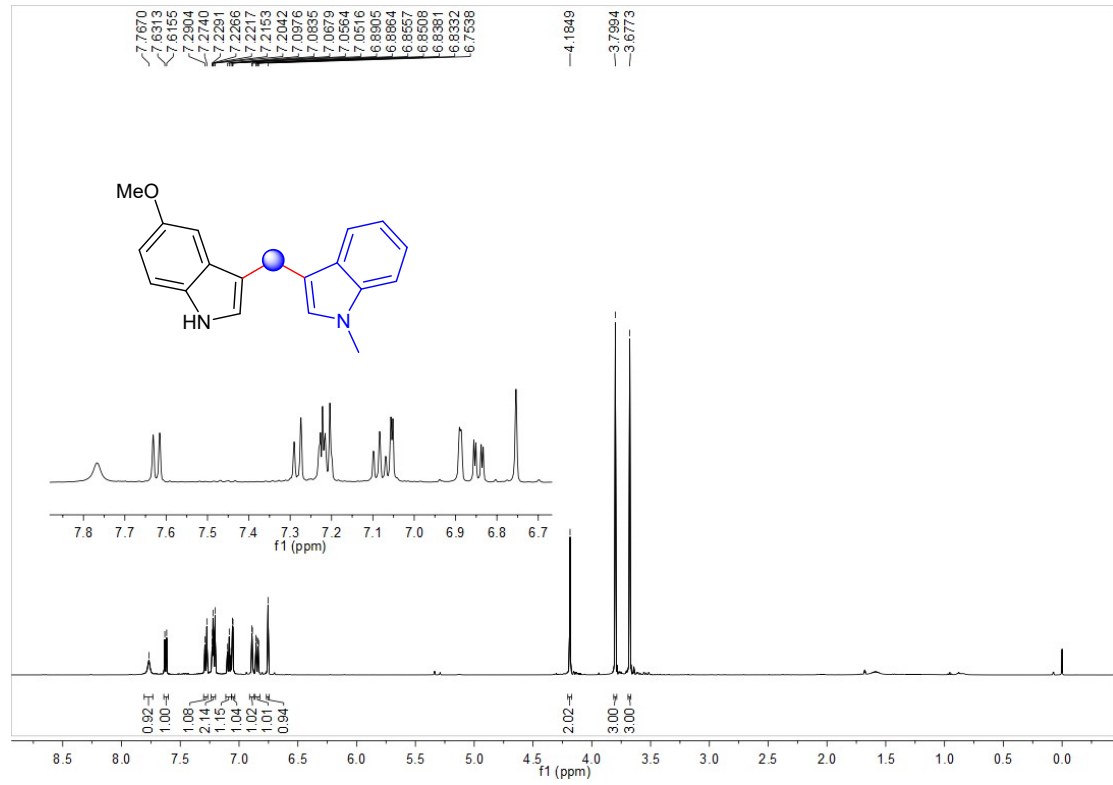<sup>13</sup>C NMR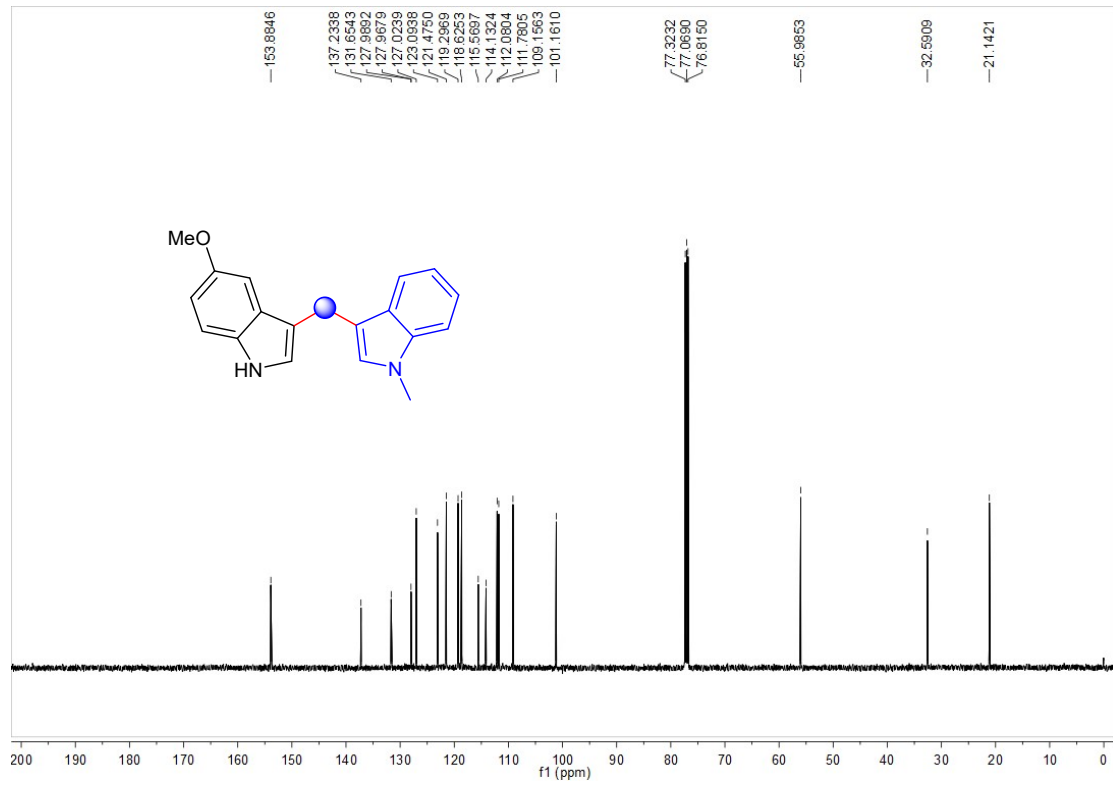

43c

<sup>1</sup>H NMR

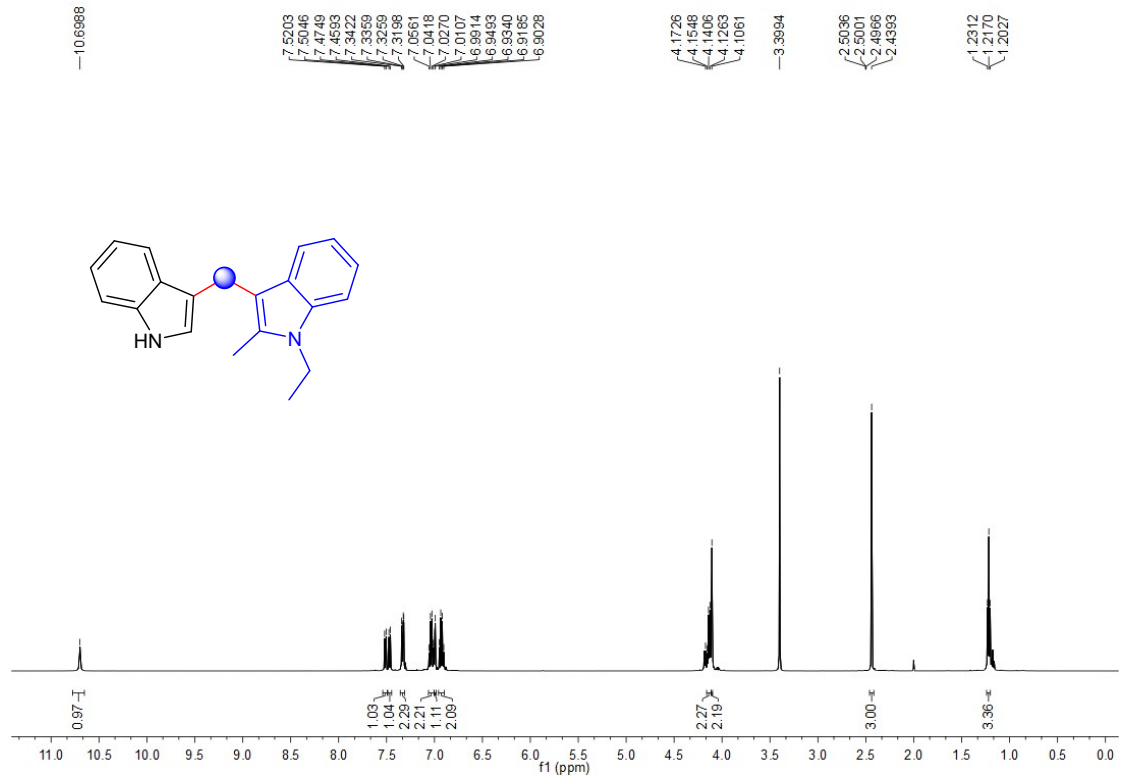

<sup>13</sup>C NMR

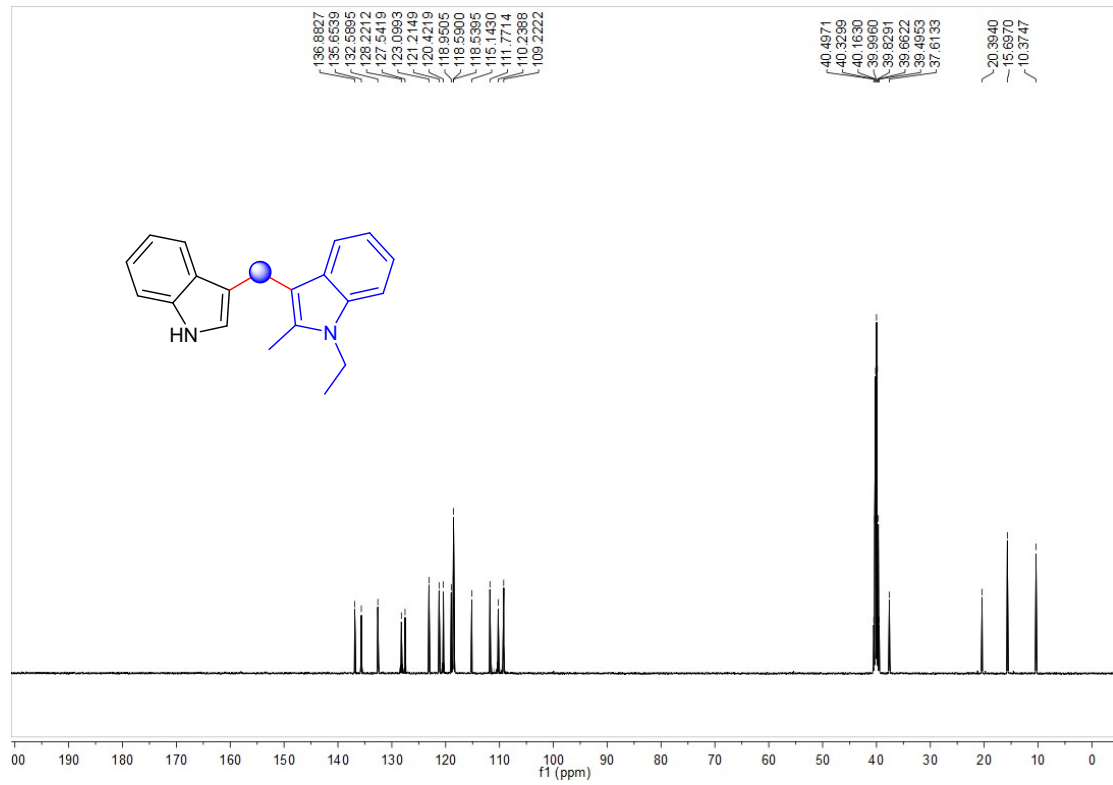

Supplement: d2qo01498j1.pdf [file d2qo01498j1.pdf]
